# Supplementary material for: Key features of the genetic architecture and evolution of host-microbe interactions revealed by high-resolution genetic mapping of the mucosa-associated gut microbiome in hybrid mice
Source: eLife. 2022 Jul 19;11:e75419. doi: 10.7554/eLife.75419 (PMC9307277; doi:10.7554/eLife.75419)
Supplement: Supplementary file 1. [file elife-75419-supp1.xlsx]

## Sheet: Heritability estimates
Taxa	This study								Cospeciation rates	Human													Mouse							Pig		Primates
	h^2 (centered matrix)		Chip heritability (standardized matrix)		PVE additive effect SNPs		PVE additive + dominance effects SNPS			Goodrich (2016)	Davenport			Turpin (2016)	Xu (2020)	Ishida (2020)	Kurilshikov (2021)		Hughes (2020)				Org (2015)						O'Connor (2014)	Chen (2018)		Grieneisen (2021)
	DNA	RNA	DNA	RNA	DNA	RNA	DNA	RNA			Winter	Summer	Combinded				LD regression	TwinUK	HB	RNT	Log	Box-Cox	All	Males	Females	Inv. Transformed	Avg	One		Feces	Cecum
Phylum Actinobacteria										0.26				0.28	0		0.04	0.24														0.09
Phylum Bacteroidetes	0.25	0.54	0.09	0.21						0.08				0.33	0		0.01	0					0.53	0.82	0.73	0.52	0	0.2				0.03
Phylum Deferribacteres	0	0.25	0	0.06	0.02	0.06	0.13	0.1
Phylum Euryarchaeto										0.28				0.66	0.18		0.09	0.32														0.12
Phylum Firmicutes	0	0.44	0	0.15						0	0	0	0	0.18	0		0	0	NA	0	0	0	0.56	0.71	0.77	0.56	0.15	0.16				0.05
Phylum Fusobacteria														0.19	0.23
Phylum Lentisphaerae														0.4					0.17	0.13	0.18	0.03
Phylum Proteobacteria	0	0.17	0	0.05						0.02	0	0.04	0	0.16	0.05		0.04	0.22	NA	0	0.04	0.06										0.06
Phylum Tenericutes										0.34				0.06			0.02	0.18														0.12
Phylum Verrucomicrobiota										0.15				0.3	0.06		0.07	NA					0.54	0.85	0.92	0.4	0.13	0.33
Class Actinobacteria										0.31	0	0.06	0	0.22	0		0.09	0.25	NA	0.11	0.1	0.13										0.09
Class Alphaproteobacteria										0.1	0	0	0	0	0		0.06	0.24	0.11	0.04	0.03	0										0.008
Class Bacilli	0	0.21	0	0.05	0.02	0.01	0.12	0.09		0.03				0.1	0		0.02	0.28														0.003
Class Bacteroidia	0.24	0.48	0.08	0.17						0.08				0.33	0		0.01	0					0.53	0.82	0.73	0.52	0	0.2				0.03
Class Betaproteobacteria										0				0.41	0.05		0.006	0
Class Clostridia	0	0.38	0	0.12						0.03				0.22	0.14		0.03	0.02					0.58	0.8	0.77	0.56	0	0.3				0.07
Class Campylobacteria																																0.08
Class Coriobacteriia										0.1				0.24	0		0	0														0.1
Class Deferribacteres	0	0.25	0	0.06	0.02	0.06	0.13	0.1
Class Deltaproteobacteria										0.19				0.32	0.46		0.04	0.21	0.04	0	0	0										0.09
Class Epsilonproteobacteria	0	0.17	0	0.05										0
Class Erysipelotrichi										0				0.49	0.1		0	0.17					0.51	0.69	0.83	0.51	0.26	0.09				0.02
Class Fusobacteriia														0.19	0.23
Class Gammaproteobacteria										0.17	0.11	0.45	0.37	0.07	0.03		0.09	0.24	0	0.33	0.27	0										0.06
Class Lentisphaeria														0.4
Class Methanobacteria										0.24				0.66	0.18		0.06	0.32
Class Mollicutes										0.32				0.18			0.01	0.18														0.12
Class Verrucomicrobiae										0.14				0.3	0.06		0.08	0.07					0.54	0.85	0.92	0.4	0.13	0.33
Order Aeromonadales														0.2
Order Actinomycetales														0.08	0.07
Order Bacillales	0	0	0	0	0.06		0.28							0			-0.2	0.07
Order Bacteroidales	0.24	0.48	0.08	0.17					0.645404	0.08		0	0	0.33	0		0.01	0	NA	0	0	0	0.53	0.82	0.73	0.52	0	0.02				0.04
Order Bifidobacteriales										0.32				0.23	0		0.1	0.27														0.09
Order Burkholderiales									0.416667	0	0.3	0.06	0.26	0.41	0.05		0.004	0	NA	0.17	0.22	0.01
Order Campylobacterales	0	0.17	0	0.05										0
Order Clostridiales	0	0.38	0	0.12					0.598965	0.03	0	0	0	0.22	0.14	0.407	0.03	0.02	NA	0.03	0.09	0.05	0.58	0.8	0.77	0.56	0	0.03				0.07
Order Coriobacteriales									0.642735	0.1				0.24	0		0	0														0.1
Order Deferibacterales	0	0.25	0	0.06	0.02	0.06	0.13	0.1
Order Desulfovibrionales									0.111111	0.19	0	0.35	0.02	0.32	0.46		0.04	0.21														0.9
Order Enterobacteriales														0	0.05
Order Erysipelotrichales									0.409596	0				0.49	0.1		0	0.17					0.51	0.69	0.83	0.51	0.26	0.09				0.2
Order Fusobacteriales														0.19	0.23
Order Lactobacillales	0.64	0.21	0.29	0.05	0.04	0.01	0.09	0.09	0.172222	0				0.1	0.08		0.02	0.28	0.09	0.007	0	0	0.77	0.79	0.55	0.51	0	0				0.1
Order Methanobacteriales										0.24				0.66	0.18		0.06	0.32
Order Oceanospirillales											0.24
Order Pasteurellales										0.2				0.23	0.32		0	0.4														0.06
Order Pseudomonadales														0
Order Rhizobiales											0	0	0
Order Rhodospirillales																			0.1	0	0	0
Order Selenomonadales									0.814534		0	0.21	0.22						NA	0	0	0
Order Sphingobacteriales									0.619048		0.01	0	0
Order Sterophyta										0.07					0.1
Order Turicibacterales										0.39				0.26	0.19								0.54	0.75	0.82	0.42	0.12	0.12
Order Verrucomicrobiales										0.14				0.3	0.06		0.08	0.07
Order Vivtivallales														0.4
Order Xanthomonadales											0
Family Acidaminococcaceae									0.914783										0.12	0.04	0	0
Family Actinomycetaceae										0.22				0.12			-0.04	0.2
Family Alcaligenaceae										0				0.4	0.04		0.008	0												0.1	0.48
Family Anaeroplasmataceae																	NA	0												0.19	0.08
Family Bacillaceae											0	0	0
Family Bacteroidacea	0.14	0	0.04	0		0		0.07	0.306818	0.03				0.58	0		0.02	0												0.2	0.19
Famly Barnsiellaceae										0.09				0.32	0
Family Bifidobacteriaceae										0.32				0.23	0		0.1	0.27														0.09
Family Bradyrhizobiaceae											0
Family Campylobacteraceae											0		0.35	0																0.08	0.27	0.07
Family Carnobacteriaceae											0	0.02	0		0.04
Family Caulobacteriaceae											0.11
Family Cerasicoccaceae																														0.15	0.34
Family Christensenellaceae										0.42				0.64	0.05		0.05	0.15												0.33	0.3	0.11
Family Clostridiacea									0.412452	0.3	0.35		0	0.35	0.01		0.08	0.29					0.61	0.83	0.8	0.57	0.09	0.05				0.02
Family Comamonadaceae														0.35	0.08
Family Coriobacteriaceae									0.642735	0.1	0	0	0	0.24	0		0	0	NA	0.12	0.1	0								0.09		0.1
Family Corynebacteriaceae														0.09																0.11	0.04
Family Deferribacteraceae	0	0.25	0	0.06	0.02	0.06	0.13	0.1
Family Dehalobacteriaceae										0.31				0.54
Family Desulfovibrionceae									0.111111	0.19	0			0.32	0.46		0.04	0.21	0.13	0	0	0								0.07	0.1	0.09
Family Elusimicrobiaceae																														0.12	0.08	0.04
Family Enterobacteriaceae										0.18	0	0	0.09	0	0.05		0.03	0.24	0	0.04	0.04	0								0.16	0.26	0.03
Family Enterococcacea												0	0.07		0.28				0	0.45	0.21	0.99
Family Erysipelotrichaceae									0.409596	0	0.32	0	0.34	0.49	0.1		0	0.17	NA	0.05	0.06	0.14	0.51	0.69	0.83	0.51	0.26	0.09		0.19	0.31	0.02
Family Eubacteriaceae										0.09				0.29	0.23
Family Fibrobcteriaceae																														0.26	0.16
Family Flavobacteriaceae												0.48	0
Family Fusobacteriaceae											0.11	0	0.03	0.19	0.23		NA	0.13													0.13
Family Helicobacteriaceae	0	0.17	0	0.05																										0.16	0.06	0.11
Family Lachnospiraceae	0	0.55	0	0.22					0.490882	0.16	0.13	0	0.29	0.17	0		0.03	0.15	NA	0.02	0	0.04	0.52	0.6	0.69	0.52	0.36	0.07		0.27	0.51	0.03
Family Lactobacillaceae	0.65	0.21	0.3	0.05	0.04	0.01	0.09	0.09	0.416667	0.04		0.13		0.26	0.16		-0.03	0.08												0.07	0.49	0.09
Family Leptotrichiaceae
Family Methonobacteriaceae										0.24				0.66	0.18		0.06	0.32
Family Mogibacteriaceae										0.16				0.33	0								0.26	0.61	0.45	0.32	0.03	0		0.16	0.29
Family Muribaculaceae																																0.11
Family Neisseriaceae											0.25	0.03	0.24
Family Odoribacteriaceae										0.1				0.34	0
Family Oxalobacteraceae										0.22	0.4			0.13	0		-0.15	0.03
Family Paraprevotellaceae										0				0.35	0.42															0.07	0.15
Family Pasteurellaceae										0.2	0.42	0.18	0.19	0.23	0.32		0	0.4														0.06
Family Peptococcaceae									0.383333	0.22				0.22			-0.02	0.06											0.78	0.08	0.15	0.05
Family Peptostreptococcaceae									0.287014	0.33		0.48		0.52			0.1	0.39	0.11	0	0	0	0.49	0.75	0.68	0.51	0.1	0.1		0.06	0.4
Family Pirellulaceae																														0.09	0.09
Family Porphyromonadaceae	0	0.36	0	0.09		0.03		0.12	0.425926	0.08		0	0	0.54	0		0.05	0	NA	0	0	0								0.13	0.39
Family Pseudomonadaceae												0.12		0
Family Prevotellaceae	0.75	0.76	0.44	0.46	0.38	0.35	0.49	0.48	0.611136	0.06			0	0.37	0		0.02	0												0.22	0.37	0.12
Family Rikenellaceae	0	0.21	0	0.05	0.08		0.21		0.840967	0				0.29	0		0.002	0					0.54	0.57	0.93	0.38	0.17	0.1		0.24	0.15	0.15
Family Rhodospirillaceae																			0.03	0.1	0.08	0
Family Ruminococcaceae	0	0.53	0	0.18	0.08		0.12		0.685077	0.19	0	0	0.12	0.34	0		0.02	0	NA	0.12	0.21	0.13	0.46	0.58	0.75	0.49	0.12	0		0.16	0.56	0.09
Family Sphaerochaetaceae																														0.08	0.39
Family Sphingomonadaceae											0.04
Family Spirochaetaceae									0.578947																					0.08	0.31
Family Staphylococcaceae	0	0	0	0	0.06		0.28							0
Family Streptococcaceae									0.0666667	0				0.1	0.05				0	0.06	0.05	0	0.31	0.51	0.48	0.38	0	0		0.31	0.13	0.09
Family Succinivibrionceae											0			0.2																0.18
Family Sutterellaceae									0.416667			0	0						0.003	0.02	0.03	0
Family Turicibacteraceae										0.39				0.26	0.19								0.54	0.75	0.82	0.42	0.12	0.12		0.27	0.23
Family Veillonellaceae									0.714286	0.01	0	0.04	0.15	0.67	0.44		0.03	0.06	0	0.04	0.08	0.03								0.18		0.04
Family Verrucomicrobiaceae										0.14				0.3	0.06		0.08	0.07					0.54	0.85	0.92	0.4	0.13	0.33		0.06
Family Victivallaceae														0.4			-0.1	0												0.19	0.37
Family Xanthomonadaceae											0
Genus Abiotrophia											0	0.18	0																0.26
Genus Acetatifactor	0	0	0	0	0.03	0.05	0.12	0.14
Genus Acetivibrio											0	0.34	0.08
Genus Acidaminococcus											0				0.05				0.04	0	0	0
Genus Acinetobacter											0.07	0	0																0.41
Genus Actinobacillus														0.04	0
Genus Actinobaculum											0
Genus Actinomyces										0.2	0	0	0	0.09			0.007	0.06
Genus Adlercreautzia										0.05	0	0		0.43			0.01	0											0.5
Genus Aestuariispira																			0	0.02	0.02	0
Genus Aggregatibacter														0.25
Genus Akkermansia										0.14	0	0.01	0	0.3	0.06		0.08	0.07	0.14	0	0	0	0.54	0.85	0.92	0.4	0.13	0.33	0.62	0.06
Genus Alicyclobacillus																													0.22
Genus Allobaculum									0.782381																				0.53
Genus Alistipes	0	0.2	0	0.05	0.09		0.22				0	0	0.05						NA	0.09	0.1	0
Genus Allisonella											0.24
Genus Alloprevotella									0.9										0.13	0	0	0
Genus Anaerococcus											0	0	0	0.28
Genus Anaerofilum									0.766775		0.05	0.22	0.23
Genus Anaerofustis										0	0	0	0	0.31
Genus Anaeroplasma																	NA	0											0.48	0.19	0.09
Genus Anaerostipes	0	0.52	0	0.18	0.07	0.12	0.3	0.41		0.05	0	0	0	0.08	0		0.05	0	NA	0.23	0.22	0.05							0.3	0.14	0.07
Genus Anaerotruncus									0.600029	0.12	0	0.49	0.02	0.41			0	0											0.82
Genus Anaerovibrio									0.714286																					0.16	0.19
Genus Atopobium											0	0	0		0.11
Genus Arcobacter															0														0.35
Genus Bacteroides	0.14	0	0.04	0		0		0.07	0.306818	0.03	0	0.01	0	0.58		0	0.02	0	NA	0	0.05	0							0.47	0.2
Genus Bacillus																													0.3
Genus Barnesiella											0.18	0.38	0.21				0.03	0	0	0.04	0.04	0
Genus Bifidobacterium										0.31	0.26	0.14	0.07	0.23	0	0	0.09	0.27	0	0.03	0.03	0.17							0.78			0.09
Genus Bilophila										0.18				0.18	0.28		0.03	0											0.32
Genus Blautia									0.490795	0.3	0	0	0	0.3	0	0	0.06	0.04	NA	0.16	0.2	0.07							0.61	0.33	0.25
Genus Butyriccoccus	0	0.05	0	0.02	0.08		0.29		0.812857		0.27	0	0				0.002	0.05	NA	0.06	0.07	0
Genus Butyricimonas										0.11	0	0	0	0.2	0.13		0.03	0.05
Genus Butyrivibrio									0.638731						0.01				0	0	0	0							0.59
Genus Campylobacter												0.32		0																0.07	0.25	0.07
Genus Catenibacterium											0			0.4	0
Genus Christensenella														0.54
Genus Chryseobacterium											0
Genus Clostridium_XIVa	0	0.41	0	0.11	0.04	0.16	0.18	0.16	0.284392	0.24	0.1	0.46	0.04	0.2	0				0	5	0.03	0								0.08
Genus Collinsella											0	0	0		0				0.08	0.1	0.1	0.1
Genus Comamonas														0.63
Genus Coprobacillus										0.06	0	0.32	0.09	0															0.43
Genus Coprobacter																			0.12	0	0	0
Genus Coprococcus									0.50711	0.09	0.46	0.06	0.26	0.04	0	0.098			0.03	0.13	0.11	0.18	0.28	0.61	0.55	0.34	0	0.02	0.19	0.22	0.3	0.03
Genus Corynebacterium									0.642735		0	0	0	0.09																0.1
Genus Dehalobacterium										0.29				0.54															0.73
Genus Desulfovibrio										0.11	0	0.28	0	0.46	0.03		-0.05	0.12	0.02	0	0	0							0.57	0.1	0.19
Genus Dialister										0.14	0	0.03	0.11	0.25	0.06				0.23	0.16	0.21	0.4										0.03
Genus Dolosigranulum											0.12		0.28
Genus Dorea	0	0	0	0	0.12	0.2	0.66	0.66	0.413853	0.05	0	0	0.16	0.44	0	0	-0.006	0.04	NA	0.25	0.15	0.36							0.28	0.26	0.36
Genus Eggerthella										0.08	0	0.05	0.02	0	0		0.1	0.13
Genus Eisenbergiella	0.66	0.55	0.36	0.23	0.3	0.24	0.45	0.39									0.01	0.26	0.34	0.38	0.39	0.11
Genus Enhydrobacter											0.15
Genus Enterobacter																													0.3
Genus Enterococcus											0.69			0	0.28														0.64
Genus Epulopiscium																														0.06
Genus Escherichia															0		0.02	NA	0	0	0	0								0.15	0.27
Genus Eubacterium										0	0	0.1	0	0	0.07	0													0.58
Genus Faecalibacterium									0.658829	0.16	0.09	0	0.03	0.26	0.15	0.543	0.03	0.06	NA	0.32	0.23	0.3							0.4	0.14		0.06
Genus Faecalitalea																			0.06	0.2	0.31	0
Genus Fibrobacter																														0.26	0.17
Genus Finegoldia									0.776273		0	0	0
Genus Fusicatenibacter	0.28	0.07	0.07	0.01		0.03		0.21									0.005	0	NA	0.04	0.16	0.13
Genus Fusobacterium											0.14	0.02	0.14	0.19	0.23
Genus Gemella											0.02	0	0
Genus Gemmiger									0.333333										0	0.08	0.07	0
Genus Gordonibacter											0	0	0
Genus Haemophilus										0.19				0.2	0.31		0.01	0.34											0.26
Genus Helicobacter	0	0.17	0	0.05																												0.11
Genus Hespellia																			0.09	0.47	0.49	0.12
Genus Holdemania										0.05	0.44	0	0.2				0	0	0	0	0	0.09
Genus Howardella											0	0	0
Genus Hungatella	0.18	0.27	0.04	0.07		0		0.08									-0.19	0.19
Genus Intestinibacter																	0	0.37	0.18	0	0	0
Genus Intestinomonas	0	0	0	0													0	0.02
Genus Lachobacterium									0.584444	0.03	0.45	0.22	0.24	0	0.12
Genus Lachnospira									0.461164	0.05				0.05	0.08		0.0055	0.2												0.15	0.56	0.04
Genus Lactobacillus	0.65	0.21	0.3	0.05	0.04	0.01	0.09	0.09	0.416667	0.04	0.36	0	0.19	0.26	0.16		-0.02	0.08	0	0.03	0.04	0							0.74	0.08	0.48	0.09
Genus Lactococcus											0.02	0.4	0.04	0.47	0.08		-0.01	0	0	0	0	0.023	0.31	0.51	0.48	0.38	0	0	0.69
Genus Leuconostoc											0.06	0	0.1
Genus Marvinbryanthia	0	0	0	0	0.16	0.14	0.45	0.32	0.523611								0.009	0.08														0.02
Genus Megamonas											0.24	0	0	0.39	0
Genus Megasphaera											0	0	0	0.12	0															0.08		0.03
Genus Methanobrevibacter										0.21				0.66	0.18		0.11	0.31	0	0.08	0.1	0.05
Genus Methylobacterium																													0.35
Genus Mitsuokella									0.837143		0	0	0.03		0
Genus Mogibacterium									0.666667		0	0	0		0
Genus Mucispirillum	0	0.25	0	0.06	0.02	0.06	0.13	0.1
Genus Ochrobactrum																													0.44
Genus Odoribacter	0	0.32	0	0.07	0.09	0.2	0.3	0.62		0	0	0	0	0.42	0.48		-0.025	0	0.07	0	0	0
Genus Olsenella											0	0.23	0
Genus Oribacterium									0.794534		0	0.12	0
Genus Oscillibacter	0.2	0.65	0.06	0.28	0.003	0.17	0.09	0.29	0.689015		0	0	0				0	0.09	NA	0	0	0.008
Genus Oscillospira										0.19	0	0	0	0	0.06	0	0	0.19					0.53	0.59	0.78		0.3	0.02	0.76	0.07	0.12
Genus Parabacteroides									0.45	0.09	0	0	0	0.57	0	0.07	0.03	0	NA	0	0	0							0.3	0.08	0.12
Genus Paraprevotella	0.79	0.75	0.5	0.45	0.38	0.38	0.52	0.5	0.830769	0	0	0	0	0.35	0.38		-0.008	0.09	0	0	0	0								0.29	0.12
Genus Parasutterella											0	0	0				0.01	0.05	0.02	0	0	0
Genus Parvimonas									0.728889		0	0.1	0
Genus Peptoniphilus											0	0	0
Genus Peptostreptococcus											0	0	0
Genus Phascolarctobcterium										0.03	0.06	0	0.06	0.64	0.08		-0.02	0	0.06	0	0	0								0.15	0.16
Genus Porphyromonas											0			0.11
Genus Prevotella									0.497555	0.06	0	0.21	0.1	0.37	0	0	0.04	0.05	0.12	0	0	0.05								0.23	0.34
Genus Pseudomonas											0.12	0.09	0.12	0															0.3
Genus Ralstonia										0.07
Genus Roseburia	0	0	0	0	0.04	0	0.27	0.15	0.133333	0.17	0	0.06	0	0.15	0		0.03	0.06	NA	0.13	0.01	0.16	0.33	0.54	0.82	0.41	0.4	0.12	0.84	0.31	0.19
Genus Rothia											0.2	0	0.03		0.07
Genus Ruminobacter																															0.43
Genus Ruminococcus (Lachnospirceae)										0.13				0.37		0.24	0	0					0.48	0.59	0.75	0.48	0.25	0.29	0.61
Genus Ruminococcus (Ruminococcaceae)									0.685317	0.03	0	0	0.13	0.48	0.04	0.406	0	0	0.15	0	0.01	0.16	0.35	0.57	0.6	0.37	0.23	0.07	0.69	0.14	0.52	0.09
Genus S24-7														0.33	0.2								0.6	0.86	0.82	0.58	0	0		0.11	0.2
Genus Slackia											0	0	0.07
Genus Salinicoccus																													0.3
Genus Senegalimassilia																			0.23	0	0	0
Genus Serratia														0
Genus Spaerochaeta																														0.08	0.39
Genus Sporobacter									0.866667										0.15	0.12	0.1	0.08
Genus Solobacterium									0.671591		0	0.21	0
Genus Sphingomonas											0																		0.26
Genus Sporacetigenium											0	0.05	0.11
Genus Staphylococcus	0	0	0	0	0.06		0.28				0	0	0	0															0.43
Genus Streptococcus										0	0.23	0	0.14	0.09	0.05	0	0.03	0.026	0	0.12	0.1	0.08							0.37	0.3	0.13
Genus Subdoligranulum									0.774603		0.09	0	0						0.28	0.29	0.3	0
Genus Succiniclasticum														0.47
Genus Succinivibrio											0.08			0.2																0.33
Genus Sutterella										0				0.4	0.04	0	0.03	0	0	0.32	0.35	0.09								0.11	0.47
Genus Tepidomonas																													0.27
Genus Treponema									0.578947																					0.08	0.31	0.07
Genus Turicibacter										0.39	0	0.19	0.13	0.26	0.19		0.03	0.4					0.54	0.75	0.82	0.58	0.12	0.12	0.29	0.26	0.36
Genus Veillonella										0.1	0.28	0	0.19	0.03	0.29		-0.003	0.26	0.13	0	0	0								0.11	0.23
Genus Victivallis																			0.24	0	0	0.02
Chao1														0.18	0.1	0
Shannon														0.44	0.04	0																0.09
ASV richness															0.07																	0.08
PC1 BC																																0.21
PC2 BC																																0.07
PC3 BC																																0.03
PC4 BC																																0.08
PC5 BC																																0.02
Microbial dysbioss index														0.27
PD_whole_tree														0.5	0.03
G_unclassified_C_Deltaproteobacteria	0.4	0.17	0.15		0.14	0.13	0.32	0.33
G_unclassified_F_Lachnospiraceae	0	0	0
G_unclassified_F_Porphyromonadaceae	0.35	0.41	0.13		0.14	0.01	0.23	0.11
G_unclassified_F_Prevotellaceae	0.25	0.63	0.07		0.02	0.25	0.3	0.48
G_unclassified_O_Bacteroidales	0	0.21	0			0.08		0.13
G_unclassified_O_Clostridiales	0.14	0.51	0.01			0.06		0.22
G_unclassified_F_Ruminococcaceae	0.28	0	0.08		0.12	0.13	0.17	0.36
G_unclassified_P_Bacteroidetes	0.76	0.69	0.41		0.3	0.29	0.53	0.38
ASV1	0	0.5	0	0.18		0		0.07
ASV10	0	0.3	0	0.07	0.08	0.07	0.25	0.11
ASV100	0	0	0	0		0.08		0.34
ASV101	0.2	0.39	0.06	0.15		0.22		0.45
ASV102	0.47	0.46	0.19	0.16	0.22	0.09	0.53	0.32
ASV108	0.15	0.45	0.03	0.16		0.01		0.05
ASV109	0	0	0	0	0.17	0.07	0.39	0.23
ASV111	0.3	0	0.09	0	0.07	0.03	0.2	0.08
ASV113	0	0	0	0	0.25		0.66
ASV115	0	0	0	0		0.29		0.39
ASV119	0	0	0	0	0.07		0.25
ASV12	0.4	0.27	0.11	0.08	0.06	0.17	0.19	0.41
ASV122	0.17	0	0.02	0		0.04		0.13
ASV124	0.65	0.24	0.28	0.07	0.18		0.45
ASV126	0.72	0.34	0.37	0.09		0.09		0.3
ASV13	0	0.18	0	0.03	0.24	0.21	0.42	0.36
ASV130	0.27	0.14	0.06	0.02		0.12		0.46
ASV133	0.06	0	0.01	0		0.04		0.31
ASV135	0.4	0.79	0.1	0.45		0.31		0.49
ASV139	0.41	0.23	0.12	0.06		0.09		0.37
ASV14	0	0.25	0	0.07	0.03		0.22
ASV142	0	0	0	0	0.16	0.13	0.28	0.3
ASV145	0	0	0	0	0.25	0.08	0.45	0.12
ASV151	0.04	0	0.01	0		0.17		0.41
ASV155	0.35	0.16	0.09	0.04		0.18		0.43
ASV156	0				0.01		0.36
ASV158	0	0.01	0	0.01		0.18		0.42
ASV166	0	0.29	0	0.08
ASV169	0	0	0	0		0.02		0.16
ASV17	0.64	0.13	0.3	0.05	0.3	0.11	0.56	0.2
ASV170	0.11	0.17	0.02	0.04		0.2		0.39
ASV173	0.29	0.28	0.07	0.08		0.12		0.22
ASV180	0.12	0.16	0.02	0.03		0.2		0.49
ASV181	0.16	0	0.05	0		0.07		0.16
ASV184	0	0	0	0		0.21		0.32
ASV19	0	0	0	0	0.12	0.23	0.51	0.59
ASV197	0	0	0	0		0.05		0.25
ASV2	0.1	0.39	0.04	0.14	0.05	0.01	0.07	0.08
ASV20	0.25	0.28	0.07	0.08	0.05	0.12	0.18	0.24
ASV21	0.33	0	0.11	0	0.15	0.11	0.35	0.12
ASV212	0.53	0.46	0.2	0.17		0.13		0.26
ASV216	0	0.28	0	0.06		0.08		0.08
ASV22	0.74	0.74	0.39	0.37	0.24	0.24	0.51	0.56
ASV229	0.23	0.46	0.05	0.15		0.19		0.36
ASV23	0.34	0.39	0.07	0.12	0.09	0.16	0.27	0.31
ASV234	0	0.36	0.03	0.12		0.18		0.66
ASV238	0.32	0.4	0.1	0.17		0.09		0.27
ASV24	0	0.01	0	0		0.06		0.36
ASV243	0.12	0.65	0.03	0.29	0.02		0.27
ASV246	0	0	0	0		0.02		0.13
ASV248	0.45	0.27	0.15	0.05		0.04		0.21
ASV25	0	0	0	0		0.11		0.39
ASV26	0.48	0.6	0.18	0.26		0.29		0.67
ASV264	0.57	0	0.22	0		0.36		0.54
ASV281	0.25	0.3	0.05	0.07		0.1		0.36
ASV29	0.41	0.11	0.16	0.03	0.18	0.01	0.46	0.09
ASV293	0	0	0	0		0.19		0.61
ASV3	0	0	0	0	0.29	0.39	0.34	0.47
ASV31	0.37	0.12	0.12	0.02	0.08	0.07	0.16	0.22
ASV32	0.38	0.43	0.15	0.15	0.11	0.04	0.4	0.08
ASV33	0	0	0	0		0.2		0.22
ASV35	0	0	0	0	0.24	0.3	0.45	0.51
ASV36	0.75	0.8	0.4	0.46		0.32		0.58
ASV370	0	0	0	0		0.19		0.45
ASV376	0	0.35	0	0.1		0		0.14
ASV38	0.29	0.23	0.14	0.07	0.12	0.07	0.5	0.14
ASV39	0	0	0	0	0.13	0.04	0.28	0.22
ASV396	0.52	0	0.22	0		0.1
ASV4	0.69	0.51	0.34	0.19	0.01	0.1	0.09	0.1
ASV40	0	0.23	0	0.04		0.019		0.38
ASV45	0.43	0.73	0.15	0.39	0.03	0.19	0.11	0.26
ASV47	0.48	0.37	0.21	0.12	0.28	0.21	0.53	0.21
ASV49	0.38	0.22	0.12	0.07		0.09		0.83
ASV5	0	0	0	0	0.19	0.22	0.3	0.08
ASV50	0.52	0.45	0.21	0.16	0.2	0.08	0.47	0.39
ASV52	0	0.39	0	0.11		0.16		0.5
ASV54	0	0	0	0
ASV58	0	0	0	0	0.02	0.23	0.21	0.1
ASV6	0	0.31	0	0.07	0.22	0.01	0.43	0.25
ASV60	0.28	0.23	0.09	0.07	0.08	0.14	0.23	0.19
ASV61	0	0	0	0
ASV63	0	0	0	0		0.05		0.25
ASV64	0	0	0	0	0.14	0.16	0.26	0.2
ASV68	0.21	0.35	0.05	0.1	0.09	0.2	0.36
ASV7	0.77	0.76	0.48	0.46	0.39		0.55
ASV70	0	0.16	0	0.02	0.06		0.29
ASV746	0	0.31	0	0.1		0.04		0.08
ASV77	0.33	0.45	0.13	0.17		0.14		0.18
ASV79	0	0.52	0	0.18	0.07	0.12	0.3	0.41
ASV82	0.29	0.43	0.08	0.13		0.08		0.29
ASV85	0	0	0	0		0.07		0.28
ASV88	0	0	0	0		0.05		0.5
ASV9	0		0		0.07		0.31
ASV91	0.51	0.55	0.19	0.28		0.13		0.28
ASV95	0.26	0.13	0.05	0.03	0.06	0.04	0.22	0.07
ASV97	0.81	0.83	0.48	0.49		0.42		0.62
ASV98	0	0	0	0	0.15	0.13	0.22	0.14
ASV99	0	0.3	0	0.08		0.05		0.17

## Sheet: references to studies
Organism	Title	Reference	Model	Heritability method
Human	Goodrich (2016)	Goodrich, Julia K., et al. (2016), ‘Genetic Determinants of the Gut Microbiome in UK Twins’, Cell host & microbe,	ACE model	h2
	Davenport (2015)	Davenport, Emily R., et al. (2015), ‘Genome-Wide Association Studies of the Human Gut Microbiota’, PLoS One, 10 (11), e0140301.	GEMMA	chip
	Turpin (2016)	Turpin, W., et al. (2016), ‘Association of host genome with intestinal microbial composition in a large healthy cohort’, Nat. Genet., 48 (11), 1413-17.	SOLAR	h2
	Xu (2020)	Xu, Fengzhe, et al. (2020), ‘The interplay between host genetics and the gut microbiome reveals common and distinct microbiome features for complex human diseases’, Microbiome, 8	GCTA	chip
	Ishida (2020)	Ishida, Sachiko, et al. (2020), ‘Genome-wide association studies and heritability analysis reveal the involvement of host genetics in the Japanese gut microbiota’, Communications Biology	GEMMA	chip
	Kurilshikov (2021)	Kurilshikov, Alexander, et al. (2021), ‘Large-scale association analyses identify host factors influencing human gut microbiome composition’, Nat. Genet., 53 (2), 156-65.	ACE model	h2
	Hughes (2020)	Hughes, David A., et al. (2020), ‘Genome-wide associations of human gut microbiome variation and implications for causal inference analyses’, Nature Microbiology, 5 (9), 1079-87.	ACE model	h2
Mouse	Org (2015)	Org, Elin, et al. (2015), ‘Genetic and environmental control of host-gut microbiota interactions’, Genome Research,Genome Res., 25 (10), 1558-69.	EMMAX	chip
	O'Connor (2014)	O’Connor, Annalouise, et al. (2014), ‘Responsiveness of cardiometabolic-related microbiota to diet is influenced by host genetics’, Mammalian Genome, 25 (11), 583-99.	Hegmann and Possidente	h2= 1/2 Va /(1/2 Va + Ve )
Pig	Chen (2018)	Chen, Congying, et al. (2018), ‘Contribution of Host Genetics to the Variation of Microbial Composition of Cecum Lumen and Feces in Pigs’, Frontiers in Microbiology	GEMMA	chip
Primates	Grieneisen (2021)	Grieneisen, L, et al. (2021), ‘Gut microbiome heritability is nearly universal but environmentally contingent.’, Science, 373 (6551), 181-86.	Asreml animal model	h2

## Sheet: Taxonomy
	sequences	ASV	index	Kingdom	Phylum	Class	Order	Family	Genus	ASV	otu_index
ASV1	ACGCTGGCGGCGTGCCTAATACATGCAAGTCGAACGATGAAGCTTTTAGCTTGCTAGAAGTGGATTAGTGGCGCACGGGTGAGTAATGCATAGGTTATGTGCCTCATAGTCTAGGATAGCCATTGGAAACGATGATTAATACTGGATACTCCCTACGGGGGAAAGTTTTTCGCTATGAGATCAGCCTATGTCCTATCAGCTTGTTGGTGAGGTAATGGCTCACCAAGGCTATGACGGGTATCCGGCCTGAGAGGGTGAACGGACACACTGGAACTGAGACACGG	ASV1	1	K_Bacteria	P_Proteobacteria	C_Epsilonproteobacteria	O_Campylobacterales	F_Helicobacteraceae	G_Helicobacter	ASV1	1
ASV2	ACGCTGGCGGCGTGCCTAATACATGCAAGTCGAACGATGAAGCTCTAGCTTGCTAGAGTGGATTAGTGGCGCACGGGTGAGTAATGCATAGATAACATGCCCTTTAGTCTAGGATAGCCATTGGAAACGATGATTAATACTGGATACTCCTTACGAGGGAAAGTTTTTCGCTAAAGGATTGGTCTATGTCCTATCAGCTTGTTGGTGAGGTAATGGCTCACCAAGGCTATGACGGGTATCCGGCCTGAGAGGGTGAACGGACACACTGGAACTGAGACACGG	ASV2	2	K_Bacteria	P_Proteobacteria	C_Epsilonproteobacteria	O_Campylobacterales	F_Helicobacteraceae	G_Helicobacter	ASV2	2
ASV3	ACGCTGGCGGCGTGCCTAATACATGCAAGTCGAACGATGAATCTTCTAGCTTGCTAGAAGTGGATTAGTGGCGCACGGGTGAGTAATGCATAGGTTATGTGCCCTTTAGTCTGGGATAGCCACTGGAAACGGTGATTAATACTGGATATTCCCTACGGGGGAAAGTTTTTCGCTAAAGGATCAGCCTATGTCCTATCAGCTTGTTGGTGAGGTAATGGCTCACCAAGGCTATGACGGGTATCCGGCCTGAGAGGGTGATCGGACACACTGGAACTGAGACACGG	ASV3	3	K_Bacteria	P_Proteobacteria	C_Epsilonproteobacteria	O_Campylobacterales	F_Helicobacteraceae	G_Helicobacter	ASV3	3
ASV4	ACGCTGGCGGCGTGCCTAATACATGCAAGTCGAGCGAGCTTGCCTAGATGATTTTAGTGCTTGCACTAAATGAAACTAGATACAAGCTAGCGGCGGACGGGTGAGTAACACGTGGGTAACCTGCCCAAGAGACTGGGATAACACCTGGAAACAGATGCTAATACCGGATAACAACACTAGACGCATGTCTAGAGTTTAAAAGATGGTTCTGCTATCACTCTTGGATGGACCTGCGGTGCATTAGCTAGTTGGTAAGGTAACGGCTTACCAAGGCAATGATGCATAGCCGAGTTGAGAGACTGATCGGCCACATTGGGACTGAGACACGG	ASV4	4	K_Bacteria	P_Firmicutes	C_Bacilli	O_Lactobacillales	F_Lactobacillaceae	G_Lactobacillus	ASV4	4
ASV5	ACGCTGGCGGCGTGCTTAACACATGCAAGTCGAACGGACTCATATTGAAACCTAGTGATTTATGAGTTAGTGGCGGACGGGTGAGTAACGCGTGGATAACCTGCCGTATACCGGGGGATAACACTTAGAAATAGGTGCTAATACCGCATAAGCGCACGGCTCCGCATGGGGCAGTGTGAAAAACTCCGGTGGTATACGATGGATCCGCGTCTGATTAGCTAGTTGGCGGGGTAACGGCCCACCAAGGCAGCGATCAGTAGCCGGCCTGAGAGGGTGGACGGCCACATTGGGACTGAGACACGG	ASV5	5	K_Bacteria	P_Firmicutes	C_Clostridia	O_Clostridiales	F_Lachnospiraceae	unclassified_F_Lachnospiraceae	ASV5	5
ASV6	ACGCTGGCGGCGTGCTTAACACATGCAAGTCAGGGAGAAAGTTTCTTCGGGAGCGAGTAAACCGGCGCACGGGTGAGTAACACGTGAGTAACCTTCCTTTTAGACTGGAACAACTTACCGAAAGGTGAGCTAATGCCGGATGAATTATGTAACCGCATGGTTATATAGAAAAAGTTGGGGCGACCTGACGCTAAAAGATGGACTCGCGTCCCATTAGCTAGTTGGTGGGGTATTGGCCTACCAAGGCGACGATGGGTAGCCGGCCTGAGAGGGTGGCCGGCCACACTGGGACTGAGACACGG	ASV6	6	K_Bacteria	P_Deferribacteres	C_Deferribacteres	O_Deferribacterales	F_Deferribacteraceae	G_Mucispirillum	ASV6	6
ASV7	ACGCTAGCTACAGGCTTAACACATGCAAGTCGAGGGGCAGCATGAACTTAGCTTGCTAAGTTTGATGGCGACCGGCGCACGGGTGAGTAACGCGTATCCAACCTTCCCATGGCTGCGGGATAGCCCGGTGAAAACCGGATTAATACCGCATGGCGTCCCTTGACGGCATCCGACAGGGACTAAAGTTTTTTCGGCCATGGATGGGGATGCGTCCGATTAGCTTGTTGGCGGGGTAACGGCCCACCAAGGCTACGATCGGTAGGGGTTCTGAGAGGAAGGTCCCCCACACTGGAACTGAGACACGG	ASV7	7	K_Bacteria	P_Bacteroidetes	C_Bacteroidia	O_Bacteroidales	F_Prevotellaceae	G_Paraprevotella	ASV7	7
ASV9	ACGCTGGCGGCGTGCCTAATACATGCAAGTCGAGCGAACAGACGAGGAGCTTGCTCCTCTGACGTTAGCGGCGGACGGGTGAGTAACACGTGGATAACCTACCTATAAGACTGGGATAACTTCGGGAAACCGGAGCTAATACCGGATAATATATTGAACCGCATGGTTCAATAGTGAAAGACGGTTTTGCTGTCACTTATAGATGGATCCGCGCCGCATTAGCTAGTTGGTAAGGTAACGGCTTACCAAGGCAACGATGCGTAGCCGACCTGAGAGGGTGATCGGCCACACTGGAACTGAGACACGG	ASV9	9	K_Bacteria	P_Firmicutes	C_Bacilli	O_Bacillales	F_Staphylococcaceae	G_Staphylococcus	ASV9	9
ASV10	ACGCTGGCGGCGTGCTTAACACATGCAAGTCAGGGAGAAAGTTCCATTTGGAGTGAGTAAACCGGCGCACGGGTGAGTAACACGTGAGTAACCTTCCTTTTAGACTGGAACAACTTACCGAAAGGTGAGCTAATGCCGGATGAATTATGTAACCGCATGGTTATATAGAAAAAGCCGGGGCAACCTGGCGCTAAAAGATGGACTCGCGTCCCATTAGCTAGTTGGTGGGGTAGAGGCCTACCAAGGCGACGATGGGTAGCCGGCCTGAGAGGGTAGCCGGCCACACTGGGACTGAGACACGG	ASV10	10	K_Bacteria	P_Deferribacteres	C_Deferribacteres	O_Deferribacterales	F_Deferribacteraceae	G_Mucispirillum	ASV10	10
ASV12	ACGCTGGCGGCGTGCCTAACACATGCAAGTCGAACGGATCCATATTGAAACCTAGTGATGTATGGATTAGTGGCGGACGGGTGAGTAACGCGTGGATAACCTGCCGTATACAGGGGGATAACACTTAGAAATAGGTGCTAATACCGCATAAGCGCACGGTTCCGCATGGAACAGTGTGAAAAACTCCGGTGGTATACGATGGATCCGCGTCTGATTAGCCAGTTGGCGGGGTAACGGCCCACCAAAGCGACGATCAGTAGCCGGCCTGAGAGGGTGAACGGCCACATTGGGACTGAGACACGG	ASV12	12	K_Bacteria	P_Firmicutes	C_Clostridia	O_Clostridiales	F_Lachnospiraceae	G_Eisenbergiella	ASV12	11
ASV13	ACGCTGGCGGCGTGCTTAACACATGCAAGTCAGGGAGAAAGTTCCTTCGGGAGCGAGTAAACCGGCGCACGGGTGAGTAACACGTGAGTAACCTGCCTTTTAGACTGGAACAACTTACCGAAAGGTGAGCTAATGCCGGATGAATTATGTAACCGCATGGTTATATAGAAAAAGTTGGGGCGACCTGACGCTAAAAGATGGACTCGCGTCCCATTAGCTAGTTGGTGGGGTATTGGCCTACCAAGGCGACGATGGGTAGCCGGCCTGAGAGGGTGGCCGGCCACACTGGGACTGAGACACGG	ASV13	13	K_Bacteria	P_Deferribacteres	C_Deferribacteres	O_Deferribacterales	F_Deferribacteraceae	G_Mucispirillum	ASV13	12
ASV14	ACGCTGGCGGCGTGCTTAACACATGCAAGTCGAACGGACTCATATTGAAACCTAGTGATATATGAGTTAGTGGCGGACGGGTGAGTAACGCGTGGAGAACCTGCCGTATACTGGGGGATAACACTTAGAAATAGGTGCTAATACCGCATAAGCGCACAGCTTCGCATGAAGCAGTGTGAAAAACTCCGGTGGTATACGATGGATCCGCGTCTGATTAGCTGGTTGGCGGGGTAAAGGCCCACCAAGGCGACGATCAGTAGCCGGCCTGAGAGGGTGAACGGCCACATTGGGACTGAGACACGG	ASV14	14	K_Bacteria	P_Firmicutes	C_Clostridia	O_Clostridiales	F_Lachnospiraceae	unclassified_F_Lachnospiraceae	ASV14	13
ASV17	ACGCTGGCGGCGTGCCTAACACATGCAAGTCGAACGGACTTATAACGAAACCTAGTGAATTATAAGTTAGTGGCGGACGGGTGAGTAACGCGTGGAAAACCTGCCGTATACTGGGGGATAACACTTAGAAATAGGTGCTAATACCGCATAAGCGCACAGCTTCGCATGAAGCAGTGTGAAAAACTCCGGTGGTATACGATGGTTCCGCGTCTGATTAGCTAGTTGGTGAGGTAAAAGCCCACCAAGGCAACGATCAGTAGCCGGCCTGAGAGGGTGAACGGCCACATTGGGACTGAGACACGG	ASV17	17	K_Bacteria	P_Firmicutes	C_Clostridia	O_Clostridiales	F_Lachnospiraceae	G_Eisenbergiella	ASV17	16
ASV19	ACGCTAGCTACAGGCTTAACACATGCAAGTCGAGGGGCATCAGGAAGGAAGCTTGCTTTCTTCGCTGGCGACCGGCGCACGGGTGAGTAACACGTATCCAACCTGCCGAAGACTCGGGGATAGCCTTTCGAAAGAAAGATTAATACCCGATGGCATGACCTTGAGGCATCTCTTGGTCATTAAAGAATTTCGGTCTTCGATGGGGATGCGTTCCATTAGCTTGTTGGCGGGGTAACGGCCCACCAAGGCATCGATGGATAGGGGTTCTGAGAGGAAGGTCCCCCACATTGGAACTGAGACACGG	ASV19	19	K_Bacteria	P_Bacteroidetes	C_Bacteroidia	O_Bacteroidales	F_Bacteroidaceae	G_Bacteroides	ASV19	18
ASV20	ACGCCGGCGGTGTGCCTAATACATGCAAGTCGTACGCACTGGCCCAACTGATTGATGGTGCTTGCACCTGATTGACGTTGGATCACCAGTGAGTGGCGGACGGGTGAGTAACACGTAGGTAACCTGCCCCGGAGCGGGGGATAACATTTGGAAACAGATGCTAATACCGCATAACAACAAAAGCCACATGGCTTTTGTTTGAAAGATGGCTTTAGCTATCACTCTGGGATGGACCTGCGGTGCATTAGCTAGTTGGTAAGGTAACGGCTTACCAAGGCGATGATGCATAGCCGAGTTGAGAGACTGATCGGCCACAATGGAACTGAGACACGG	ASV20	20	K_Bacteria	P_Firmicutes	C_Bacilli	O_Lactobacillales	F_Lactobacillaceae	G_Lactobacillus	ASV20	19
ASV21	ACGCTAGCGGCAGGCTTAACACATGCAAGTCGAGGGGCAGCGAGATCAGTGCTTGCACTGATTGTCGGCGACCGGCGCACGGGTGCGTAACGCGTATGCAACCTACCCATTACAGGGGGATAACACTGAGAAATCGGTACTAATACCCCATAACATCCAGGGAGGCATCTTCTTGGGTTGAAAACTCCGGTGGTAATGGATGGGCATGCGTTGTATTAGTTAGTTGGTGGGGTAACGGCTCACCAAGACAACGATACATAGGGGGACTGAGAGGTTAACCCCCCACATTGGTACTGAGACACGG	ASV21	21	K_Bacteria	P_Bacteroidetes	C_Bacteroidia	O_Bacteroidales	F_Rikenellaceae	G_Alistipes	ASV21	20
ASV22	ACGCTAGCTACAGGCTTAACACATGCAAGTCGAGGGGCAGCATGAACTTAGCTTGCTAAGTTCGATGGCGACCGGCGCACGGGTGAGTAACACGTATCCAACCTGCCTTCAACTCAGGGATAGCCTTTCGAAAGAAAGATTAATACTTGATGGCATAACCTGGTCTCCTGACTTGGTTATTAAAGAATTTCGGTTGAAGATGGGGATGCGTTCCATTAGGCAGTTGGCGGGGTAACGGCCCACCAAACCTACGATGGATAGGGGTTCTGAGAGGAAGGTCCCCCACATTGGAACTGAGACACGG	ASV22	22	K_Bacteria	P_Bacteroidetes	C_Bacteroidia	O_Bacteroidales	F_Bacteroidaceae	G_Bacteroides	ASV22	21
ASV23	ACGCTGGCGGCGTGCTTAACACATGCAAGTCGAACGGACTCATATTGAAACCTAGTGATGTATGAGTTAGTGGCGGACGGGTGAGTAACGCGTGGAGAACCTGCCGTATACTGGGGGATAACACTTAGAAATAGGTGCTAATACCGCATAAGCGCACAGCTTCGCATGAAGCAGTGTGAAAAACTCCGGTGGTATACGATGGATCCGCGTCTGATTAGCTTGTTGGCGGGGTAAAGGCCCACCAAGGCGACGATCAGTAGCCGGCCTGAGAGGGTGAACGGCCACATTGGGACTGAGACACGG	ASV23	23	K_Bacteria	P_Firmicutes	C_Clostridia	O_Clostridiales	F_Lachnospiraceae	G_Eisenbergiella	ASV23	22
ASV24	ACGCTGGCGGCGTGCTTAACACATGCAAGTCGAACGAAGCGATCGGGAGGAAGTTTTCGGATGGAATCCGGATTGACTGAGTGGCGGACGGGTGAGTAACGCGTGGGTAACCTGCCTCATACAGGGGGATAACAGTTAGAAATGACTGCTAATACCGCATAAGCGCACAGGGACACATGTTCCGGTGTGAAAAACTCCGGTGGTATGAGATGGACCCGCGTCTGATTAGCTGGTTGGCGGGGTAACGGCCCACCAAGGCGACGATCAGTAGCCGACCTGAGAGGGTGACCGGCCACATTGGGACTGAGACACGG	ASV24	24	K_Bacteria	P_Firmicutes	C_Clostridia	O_Clostridiales	F_Lachnospiraceae	G_Clostridium_XlVa	ASV24	23
ASV25	ACGCTGGCGGCGTGCTTAACACATGCAAGTCGAACGGGAATGCCACGCTGATGCGATTTCGGTCAAATCATGTGGCATTCGAGTGGCGGACGGGTGAGTAACGCGTGGGTAACCTGCCTTACACAGGGGGATAACACCTGGAAACAGGTGCTAATACCGCATAAGCGCACAGGGCCGCATGGCCCGGTGTGAAAAACTCCGGTGGTGTAAGATGGACCCGCGTCTGATTAGCTTGTTGGCGGGGTAGGGGCCCACCAAGGCGACGATCAGTAGCCGGCCTGAGAGGGTGGACGGCCACATTGGGACTGAGACACGG	ASV25	25	K_Bacteria	P_Firmicutes	C_Clostridia	O_Clostridiales	F_Lachnospiraceae	unclassified_F_Lachnospiraceae	ASV25	24
ASV26	ACGCTGGCGGCGTGCTTAACACATGCAAGTCGAACGGAGCACCCCTGAAGGAGTTTTCGGACAACGGAAGGGAATGCTTAGTGGCGGACTGGTGAGTAACGCGTGAGGAACCTGCCTTTCGGAGGGGGACAACAGTTGGAAACGACTGCTAATACCGCATGACGTATCGGGATCGCATGGTCTTGATACCAAAGATTTTATCGCCGAAAGATGGCCTCGCGTCTGATTAGCTAGTTGGTGGGGTAACGGCCTACCAAGGCGACGATCAGTAGCCGGACTGAGAGGTTGGCCGGCCACATTGGGACTGAGATACGG	ASV26	26	K_Bacteria	P_Firmicutes	C_Clostridia	O_Clostridiales	F_Ruminococcaceae	G_Oscillibacter	ASV26	25
ASV29	ACGCTGGCGGCGTGCCTTACACATGCAAGTCGAACGTGAAAGTACCTTCGGGTATGAGTAAAGTGGCGCACGGGTGAGTAACGCGTGGATAATCTACCGGGAAGTTCGGAATAACAGCTGGAAACGGTTGCTAATACCGGATACACTACATATAAACGTATGTGGGAAAGACGGCCTCTGCATATGCTGTTGCTTTCCGATGAGTCCGCGTACCATTAGCTAGTTGGTGGGGTAAAGGCCTACCAAGGCGACGATGGTTAACTGGTCTGAGAGGATGATCAGTCACACTGGAACTGGAACACGG	ASV29	29	K_Bacteria	P_Proteobacteria	C_Deltaproteobacteria	unclassified_C_Deltaproteobacteria	unclassified_C_Deltaproteobacteria	unclassified_C_Deltaproteobacteria	ASV29	28
ASV31	ACGCCGGCGGTGTGCCTAATACATGCAAGTCGTACGCACTGGCCCAACTGATTGATGGTGCTTGCACCTGATTGACGATGGATCACCAGTGAGTGGCGGACGGGTGAGTAACACGTAGGTAACCTGCCCCGGAGCGGGGGATAACATTTGGAAACAGATGCTAATACCGCATAACAACAAAAGCCACATGGCTTTTGTTTGAAAGATGGCTTTGGCTATCACTCTGGGATGGACCTGCGGTGCATTAGCTAGTTGGTAAGGTAACGGCTTACCAAGGCGATGATGCATAGCCGAGTTGAGAGACTGATCGGCCACAATGGAACTGAGACACGG	ASV31	31	K_Bacteria	P_Firmicutes	C_Bacilli	O_Lactobacillales	F_Lactobacillaceae	G_Lactobacillus	ASV31	30
ASV32	ACGCTGGCGGCATGCCTAACACATGCAAGTCGAACGGGGTTTATATAACAGAACTCTCCGGAGGGAAGATATATAAACCTAGTGGCGGACGGGTGAGTAACGCGTGGGCAACCTGCCCTGTACCGGGGGACAACAGCCAGAAATGGCTGCTAATACCGCATAAGCCTGCGGTGCCGCATGGCACAGCAGGGAAAACCACGGTGGTACAGGATGGGCCCGCGTCTGATTAGTTAGTTGGCAGGGTAACGGCCTACCAAGACGATGATCAGTAGCCGGCTTGAGAGAGTGGACGGCCACATTGGGACTGAGACACGG	ASV32	32	K_Bacteria	P_Firmicutes	C_Clostridia	O_Clostridiales	F_Lachnospiraceae	unclassified_F_Lachnospiraceae	ASV32	31
ASV33	ACGCTGGCGGCGTGCTTAACACATGCAAGTCGAACGGAGCACCCCTGAAGGAGTTTTCGGACAACGGATGGGAATGCTTAGTGGCGGACTGGTGAGTAACGCGTGAGGAACCTGCCTTCCAGAGGGGGACAACAGTTGGAAACGACTGCTAATACCGCATGATGCGTTGGAGCCGCATGACTCCGACGTCAAAGATTTATCGCTGGAAGATGGCCTCGCGTCTGATTAGCTAGTTGGTGAGGTAACGGCCCACCAAGGCGACGATCAGTAGCCGGACTGAGAGGTTGGCCGGCCACATTGGGACTGAGATACGG	ASV33	33	K_Bacteria	P_Firmicutes	C_Clostridia	O_Clostridiales	F_Ruminococcaceae	G_Oscillibacter	ASV33	32
ASV35	ACGCTAGCTACAGGCTTAACACATGCAAGTCGAGGGGCAGCATGAACTTAGCTTGCTAAGTTTGATGGCGACCGGCGCACGGGTGAGTAACACGTATCCAACCTGCCGATGACTCGGGGATAGCCTTTCGAAAGAAAGATTAATACCCGATGGCATAGTTCTTCCGCATGGTAGAACTATTAAAGAATTTCGGTCATCGATGGGGATGCGTTCCATTAGCTTGTTGGCGGGGTAACGGCCCACCAAGGCATCGATGGATAGGGGTTCTGAGAGGAAGGTCCCCCACATTGGAACTGAGACACGG	ASV35	35	K_Bacteria	P_Bacteroidetes	C_Bacteroidia	O_Bacteroidales	F_Bacteroidaceae	G_Bacteroides	ASV35	34
ASV36	ACGCTGGCGGCGTGCTTAACACATGCAAGTCGAACGGAGCGCCTATGAAGGAGATTTCGGTCAACGGAATAGGCTGCTTAGTGGCGGACGGGTGAGTAACGCGTGAGGAACCTGCCTTTCAGAGGGGGACAACAGTTGGAAACGACTGCTAATACCGCATAACACATAGGTGTCGCATGGCATTTATGTCAAAGATTTATCGCTGAAAGATGGCCTCGCGTCTGATTAGCTAGTTGGTGAGGTAACGGCTCACCAAGGCGACGATCAGTAGCCGGACTGAGAGGTTGGCCGGCCACATTGGGACTGAGATACGG	ASV36	36	K_Bacteria	P_Firmicutes	C_Clostridia	O_Clostridiales	F_Ruminococcaceae	G_Oscillibacter	ASV36	35
ASV38	ACGCTGGCGGCATGCCTAACACATGCAAGTCGAACGGGGTTTATATGACGGAACTCTCCGGAGGGAAGATATATAAACCTAGTGGCGGACGGGTGAGTAACGCGTGGGCAACCTGCCCTGTACCGGGGGACAACAGCCAGAAATGGCTGCTAATACCGCATAAGCCTGCTGTGCCGCATGGCACAGCAGGGAAAACCACGGTGGTACAGGATGGGCCCGCGTCTGATTAGTTAGTTGGCAGGGTAACGGCCTACCAAGACAACGATCAGTAGCCGGCTTGAGAGAGTGGACGGCCACATTGGGACTGAGACACGG	ASV38	38	K_Bacteria	P_Firmicutes	C_Clostridia	O_Clostridiales	F_Lachnospiraceae	unclassified_F_Lachnospiraceae	ASV38	37
ASV39	ACGCTGGCGGCGTGCCTAACACATGCAAGTCGAGCGAAGCGATTTTGAGGAAGTTTTCGGATGGAATCGAAATTGACTTAGCGGCGGACGGGTGAGTAACACGTGGGTAATCTGCCTTATACAGGGGGATAACAGTTAGAAATGACTGCTAATACCGCATAAGCGCACGGGGACGCATGTTTCTGTGTGAAAAACTCCGGTAGTATAAGATGAGCCCGCGTCTGATTAGCTGGTTGGTGGGGTAACGGCCTACCAAGGCGACGATCAGTAGCCGGCCTGAGAGGGTGAACGGCCACATTGGGACTGAGACACGG	ASV39	39	K_Bacteria	P_Firmicutes	C_Clostridia	O_Clostridiales	F_Lachnospiraceae	G_Hungatella	ASV39	38
ASV40	ACGCTGGCGGCGTGCTTAACACATGCAAGTCGAACGGGGATTACACGGAGATGCGATTTCGGTCAAATCAAGTGCAATCTTAGTGGCGGACGGGTGAGTAACGCGTGGGTAACCTGCCTTGCACTGGGGGATAACACTTAGAAATAGGTGCTAATACCGCATAAGCGCACGGTCCTGCATGGGACAGTGTGAAAAACTCCGGTGGTGCAAGATGGACCCGCGTCTGATTAGCTGGTTGGCGGGGTAAAGGCCCACCAAGGCGACGATCAGTAGCCGGCCTGAGAGGGTGGACGGCCACATTGGGACTGAGACACGG	ASV40	40	K_Bacteria	P_Firmicutes	C_Clostridia	O_Clostridiales	F_Lachnospiraceae	unclassified_F_Lachnospiraceae	ASV40	39
ASV45	ACGCTGGCGGCGTGCTTAACACATGCAAGTCGAGCGAAGCACTTTTTTAGAACTCTTCGGAGGGAAGAGAGGGTGACTTAGCGGCGGACGGGTGAGTAACGCGTGGGCAACCTGCCTTACACAGGGGGATAACAATTAGAAATGATTGCTAATACCGCATAAGACCCCAGTACCGCATGGTACAGGGGTAAAAACTGAGGTGGTGTAAGATGGGCCCGCGTCTGATTAGGTAGTTGGTGGGGTAGAAGCCTACCAAGCCGACGATCAGTAGCCGACCTGAGAGGGCGACCGGCCACATTGGGACTGAGACACGG	ASV45	45	K_Bacteria	P_Firmicutes	C_Clostridia	O_Clostridiales	F_Lachnospiraceae	unclassified_F_Lachnospiraceae	ASV45	43
ASV47	ACGCTGGCGGCATGCCTAACACATGCAAGTCGAACGGGGTTTATATAACAGAACTCTCCGGAGGGAAGATATATAAACCTAGTGGCGGACGGGTGAGTAACGCGTGGGCAACCTGCCCTGTACCGGGGGACAACAGCCAGAAATGGCTGCTAATACCGCATAAGCCTGCTGTGCCGCATGGCACAGCAGGGAAAACCACGGTGGTACAGGATGGGCCCGCGTCTGATTAGTTAGTTGGCAGGGTAACGGCCTACCAAGACAACGATCAGTAGCCGGCTTGAGAGAGTGGACGGCCACATTGGGACTGAGACACGG	ASV47	47	K_Bacteria	P_Firmicutes	C_Clostridia	O_Clostridiales	F_Lachnospiraceae	unclassified_F_Lachnospiraceae	ASV47	45
ASV49	ACGCTGGCGGCGTGCCTAACACATGCAAGTCGAACGGACTTATAACGAAACCTAGTGAATTATAAGTTAGTGGCGGACGGGTGAGTAACGCGTGGAAAACCTGCCGTATACTGGGGGATAACACTTAGAAATAGGTGCTAATACCGCATAAGCGCACAGCTTCGCATGAAGCAGTGTGAAAAACTCCGGTGGTATACGATGGTTCCGCGTCTGATTAGCTAGTTGGTGAGGTAAAAGCCCACCAAGGCGACGATCAGTAGCCGGCCTGAGAGGGTGAACGGCCACATTGGGACTGAGACACGG	ASV49	49	K_Bacteria	P_Firmicutes	C_Clostridia	O_Clostridiales	F_Lachnospiraceae	G_Eisenbergiella	ASV49	47
ASV50	ACGCTGGCGGCATGCCTAACACATGCAAGTCGAACGGGGTTTATATGACAGAACTCTCCGGAGGGAAGATATATAAACCTAGTGGCGGACGGGTGAGTAACGCGTGGGCAACCTGCCCTGTACCGGGGGACAACAGCCAGAAATGGCTGCTAATACCGCATAAGCCTGCTGTGCCGCATGGCACAGCAGGGAAAACCACGGTGGTACAGGATGGGCCCGCGTCTGATTAGTTAGTTGGCAGGGTAACGGCCTACCAAGACAACGATCAGTAGCCGGCTTGAGAGAGTGGACGGCCACATTGGGACTGAGACACGG	ASV50	50	K_Bacteria	P_Firmicutes	C_Clostridia	O_Clostridiales	F_Lachnospiraceae	unclassified_F_Lachnospiraceae	ASV50	48
ASV52	ACGCTAGCGACAGGCTTAACACATGCAAGTCGAGGGGTAACAGTATGTAGCAATACATAGCTGACGACCGGCGCACGGGTGAGTAACGCGTATGCAACCTGTCCGTTACAGGGGGATAGCCCATGGAAACGTGGATTAACACTCCATAATATAATATAGAGGCATCTTTGTATTATTAAATATTCATAGGTAACGGTTGGGCATGCGTCCTATTAGATAGTTGGGGGGGTAACGGCCCACCAAGTCGATGATAGGTAGGGGTTCTGAGAGGAAGGTCCCCCACACTGGTACTGAGACACGG	ASV52	52	K_Bacteria	P_Bacteroidetes	C_Bacteroidia	O_Bacteroidales	F_Porphyromonadaceae	G_Odoribacter	ASV52	50
ASV54	ACGCTAGCGACAGGCTTAACACATGCAAGTCGAGGGGCAGCGGGGAGTGAGGCTTGCCTTACTTTGCCGGCGACCGGCGCACGGGTGAGTAACACGTATGCAACCTACCCTTTACAGCGGGATAACCGGAAGAAATTTCGCCTAATACCGCATATACTCCTTGGGAGGCATCTTCCGAGGGGGAAAGAATTTCGGTAAAGGATGGGCATGCGTCGCATTAGTTAGTTGGCGGTGTAACGGACCACCAAGACGACGATGCGTAGGGGTTCTGAGAGGAAGGTCCCCCACACTGGTACTGAGACACGG	ASV54	54	K_Bacteria	P_Bacteroidetes	C_Bacteroidia	O_Bacteroidales	unclassified_O_Bacteroidales	unclassified_O_Bacteroidales	ASV54	52
ASV58	ACGCTGGCGGCGTGCCTAACACATGCAAGTCGAACGGGGTATATAAGCGGAAGTTTACGGATGGAAGGTTATATACTTAGTGGCGGACGGGTGAGTAACGCGTGGGCAACCTGCCCCGTGCCGGGGGATACCGCCTGGAAACAGGCGCTAATACCGCATAAGCGCATACAGCCGCATGGGTGTATGCGGAAAGCTCCGGCGGCACGGGATGGGCCCGCGCCCGATTAGCCAGTTGGCGGGGTAACGGCCCACCAAAGCGACGATCGGTAGCCGGCCTGAGAGGGCGGACGGCCACATTGGGACTGAGACACGG	ASV58	58	K_Bacteria	P_Firmicutes	C_Clostridia	O_Clostridiales	F_Lachnospiraceae	unclassified_F_Lachnospiraceae	ASV58	55
ASV60	ACGCTGGCGGCGTGCCTAACACATGCAAGTCGAACGGATCCATACTGAAACCTAGTGATGTATGGATTAGTGGCGGACGGGTGAGTAACGCGTGGATAACCTGCCGTATACAGGGGGATAACACTTAGAAATAGGTGCTAATACCGCATAAGCGCACGGTTCCGCATGGAACAGTGTGAAAAACTCCGGTGGTATACGATGGATCCGCGTCTGATTAGCCAGTTGGTGGGGTAACGGCCCACCAAAGCGACGATCAGTAGCCGGCCTGAGAGGGTGAACGGCCACATTGGGACTGAGACACGG	ASV60	60	K_Bacteria	P_Firmicutes	C_Clostridia	O_Clostridiales	F_Lachnospiraceae	G_Eisenbergiella	ASV60	56
ASV61	ACGCTAGCGGCAGGCTTAACACATGCAAGTCGAGGGGCATCGGGAGGGAAGCTTGCTTTCCTTGCCGGCGACCGGCGCACGGGTGAGTAACACGTATGCAACCTGCCCTCTTCAGGGGGACAACCTTCCGAAAGGGAGGCTAATCCCGCGTATATCGGTTTCGGGCATCCGAGATCGAGGAAAGATTCATCGGAAGAGGATGGGCATGCGGCGCATTAGCTAGACGGCGGGGTAACGGCCCACCGTGGCGACGATGCGTAGGGGTTCTGAGAGGAAGGTCCCCCACACTGGTACTGAGACACGG	ASV61	61	K_Bacteria	P_Bacteroidetes	C_Bacteroidia	O_Bacteroidales	unclassified_O_Bacteroidales	unclassified_O_Bacteroidales	ASV61	57
ASV63	ACGCTGGCGGCGTGCTTAACACATGCAAGTCGAACGGGGTGCCCATGAAGGAGATTTCGGTCAACGGATTGGGTTACTTAGTGGCGGACGGGTGAGTAACGCGTGAGGAACCTGCCTTTCAGAGGGGGACAACAGTTGGAAACGACTGCTAATACCGCATAACATGTAGGTGTCGCATGGCATTTACATCAAAGATTTATCGCTGAGAGATGGCCTCGCGTCTGATTAGCTAGTTGGTAGGGTAACGGCCTACCAAGGCGACGATCAGTAGCCGGACTGAGAGGTTGGCCGGCCACATTGGGACTGAGATACGG	ASV63	63	K_Bacteria	P_Firmicutes	C_Clostridia	O_Clostridiales	F_Ruminococcaceae	G_Oscillibacter	ASV63	58
ASV64	ACGCTGGCGGCATGCCTAACACATGCAAGTCGAACGGGGTTTATATAACAGAACTCTCCGGAGGGAAGTTATATAAACCTAGTGGCGGACGGGTGAGTAACGCGTGGGGAACCTGCCCTGTACCGGGGGACAACAGCCAGAAATGGCTGCTAATACCGCATAACCCTGCACTGCCGCATGGCGGTGCAGGGAAAACTCCGGTGGTACAGGATGGCCCCGCGTCTGATTAGCTTGTTGGCGGGGTAACGGCCCACCAAGGCAACGATCAGTAGCCGGCTTGAGAGAGCGGACGGCCACATTGGGACTGAGACACGG	ASV64	64	K_Bacteria	P_Firmicutes	C_Clostridia	O_Clostridiales	F_Lachnospiraceae	unclassified_F_Lachnospiraceae	ASV64	59
ASV68	ACGCTGGCGGCGTGCTTAACACATGCAAGTCGAGCGAAGCACTTTTTTAGAACTCTTCGGAGGGAAGAGAGGGTGACTTAGCGGCGGACGGGTGAGTAACGCGTGGGCAACCTGCCTTACACAGGGGGATAACAATTAGAAATGATTGCTAATACCGCATAAGACCCCGGTACCGCATGGTACAGGGGTAAAAACTGAGGTGGTGTAAGATGGGCCCGCGTCTGATTAGGTAGTTGGTGGGGTAGAAGCCTACCAAGCCGACGATCAGTAGCCGACCTGAGAGGGCGACCGGCCACATTGGGACTGAGACACGG	ASV68	68	K_Bacteria	P_Firmicutes	C_Clostridia	O_Clostridiales	F_Lachnospiraceae	G_Hungatella	ASV68	61
ASV70	ACGCTAGCGACAGGCTTAACACATGCAAGTCGAGGGGTAACAGTATGTAGCAATACATAGCTGACGACCGGCGCACGGGTGAGTAACGCGTATGCAACCTGTCCGTTACAGGGGGATAGCCCATGGAAACGTGGATTAACACTCCATAATATAATATAGAGGCATCTTTATATTATTAAATATTCATAGGTAACGGTTGGGCATGCGTCCTATTAGATAGTTGGGGGGGTAACGGCCCACCAAGTCGATGATAGGTAGGGGTTCTGAGAGGAAGGTCCCCCACACTGGTACTGAGACACGG	ASV70	70	K_Bacteria	P_Bacteroidetes	C_Bacteroidia	O_Bacteroidales	F_Porphyromonadaceae	G_Odoribacter	ASV70	63
ASV77	ACGCTGGCGGCGTGCTTAACACATGCAAGTCGAACGAAGCAATAGGAAGGAAGTTTTCGGATGGAATTCATATTGACTGAGTGGCGGACGGGTGAGTAACGCGTGGGTAACCTGCCTCATACAGGGGGATAACAGTTAGAAATGACTGCTAATACCGCATAAGCGCACAGAATCGCATGATTCGGTGTGAAAAACTCCGGTGGTATGAGATGGACCCGCGTCTGATTAGCTAGTTGGTGGGGTAAAGGCCTACCAAGGCGACGATCAGTAGCCGACCTGAGAGGGTGATCGGCCACATTGGGACTGAGACACGG	ASV77	77	K_Bacteria	P_Firmicutes	C_Clostridia	O_Clostridiales	F_Lachnospiraceae	unclassified_F_Lachnospiraceae	ASV77	66
ASV79	ACGCTGGCGGCGTGCTTAACACATGCAAGTCGAACGAAGCACTACCGACGGAACTTTTCGGAGGGAAGATGGTAATGACTGAGTGGCGGACGGGTGAGTAACGCGTGGGCAACCTGCCCCATAGAGGGGGACAACAGCTGGAAACGGCTGCTAATACCGCATAACAAGGAGAGAGCGCATGTTCTTTTCTTCAAAGATTTATCGCTATGGGATGGACCCGCGTCTGATTAGCTGGTTGGTGAGGTAACGGCTCACCAAGGCGACGATCAGTAGCCGGCTTGAGAGAGTGGACGGCCACATTGGGACTGAGACACGG	ASV79	79	K_Bacteria	P_Firmicutes	C_Clostridia	O_Clostridiales	F_Lachnospiraceae	G_Anaerostipes	ASV79	67
ASV82	ACGCTGGCGGCGTGCTTAACACATGCAAGTCGAACGAGAACCATTGGATCGAGGATTCGTCCAAGTGAAGGTGGGGAAAGTGGCGGACGGGTGAGTAACGCGTGAGCAATCTGCCTTGGAGTGGGGAATAACGGCTGGAAACAGCCGCTAATACCGCATGATACAGCTGGGAGGCATCTCCCTGGCTGTCAAAGATTTATCGCTCTGAGATGAGCTCGCGTCTGATTAGCTAGTTGGCGGGGTAACGGCCCACCAAGGCGACGATCAGTAGCCGGACTGAGAGGTTGGCCGGCCACATTGGGACTGAGACACGG	ASV82	82	K_Bacteria	P_Firmicutes	C_Clostridia	O_Clostridiales	F_Ruminococcaceae	unclassified_F_Ruminococcaceae	ASV82	69
ASV85	ACGCTGGCGGCGTGCTTAACACATGCAAGTCGAACGGGGGATGTACAGCGGGAAGATTTCGGTCGGACCAAGTGCATGCCTAGTGGCGGACGGGTGAGTAACGCGTGGGTAACCTGCCTTACACAGGGGGATAACACTTAGAAATAGGTGCTAATACCGCATGAGCGCACAGGACCGCATGGTCGAGTGTGAAAAACTGAGGTGGTGTAAGATGGACCCGCGTCTGATTAGCTAGTTGGTGAGGTAACGGCCCACCAAGGCGACGATCAGTAGCCGGCCTGAGAGGGTGGACGGCCACATTGGGACTGAGACACGG	ASV85	85	K_Bacteria	P_Firmicutes	C_Clostridia	O_Clostridiales	F_Lachnospiraceae	unclassified_F_Lachnospiraceae	ASV85	72
ASV88	ACGCTGGCGGCGTGCTTAACACATGCAAGTCGAACGAAGCACCTGAGAATGATTCTTCGGATGAAGTCTCTTGTGACTGAGTGGCGGACGGGTGAGTAACGCGTGGGTAACCTGCCTCACACAGGGGGATAACAGTTGGAAACGACCGCTAATACCGCATAACCCGCTGGTGCCGCATGGCACTGACGGAAAAGATTTATCGGTGTGAGATGGACCCGCGTCTGATTAGCCAGTTGGCAGGGTAACGGCCTACCAAAGCGACGATCAGTAGCCGGCCTGAGAGGGTGAACGGCCACATTGGGACTGAGACACGG	ASV88	88	K_Bacteria	P_Firmicutes	C_Clostridia	O_Clostridiales	F_Lachnospiraceae	unclassified_F_Lachnospiraceae	ASV88	75
ASV91	ACGCTGGCGGCGTGCTTAACACATGCAAGTCGAGCGAAGCGTATTAGCGGAAGTTTTCGGATGGAAGCGGATATGACTTAGCGGCGGACGGGTGAGTAACGCGTGGATAACCTGCCTCATACAGGGGGATAACAGTTAGAAATGACTGCTAATACCGCATAAGCGCACAGGACCGCATGGTCCGGTGTGAAAAACTCCGGTGGTATGGGATGGATCCGCGTCTGATTAGCTGGTTGGTGAGGTAACGGCCCACCAAGGCGACGATCAGTAGCCGACCTGAGAGGGTGGCCGGCCACATTGGGACTGAGACACGG	ASV91	91	K_Bacteria	P_Firmicutes	C_Clostridia	O_Clostridiales	F_Lachnospiraceae	G_Clostridium_XlVa	ASV91	77
ASV95	ACGCTAGCGACAGGCTTAACACATGCAAGTCGAGGGGCAGCGGGGGAGTAGCAATACTCCCGCCGGCGACCGGCGCACGGGTGAGTAACACGTATGAAACCTGCCCGTAGCAGGGGAATAAGCGGAAGAAATTCCGTCTAATACCGCGTAACAACCCTTGGAGGCATCTCCTCGGGTTTAAAGGAAGCGATTCCGGCTACGGATGGTCATGCGTCGCATTAGCTTGTTGGCGGGGTAACGGCCCACCAAGGCGACGATGCGTAGGGGTTCTGAGAGGAAGGTCCCCCACACTGGTACTGAGACACGG	ASV95	95	K_Bacteria	P_Bacteroidetes	C_Bacteroidia	O_Bacteroidales	F_Porphyromonadaceae	unclassified_F_Porphyromonadaceae	ASV95	80
ASV97	ACGCTGGCGGCGTGCTTAACACATGCAAGTCGAACGGAGCACCCCTGAAGGAGTTTTCGGACAACGGATGGGAATGCTTAGTGGCGGACTGGTGAGTAACGCGTGAGGAACCTGCCTTCCAGAGGGGGACAACAGTTGGAAACGACTGCTAATACCGCATGATGCGTTGGAGCCGCATGACTTCGACGTCAAAGATTTATCGCTGGAAGATGGCCTCGCGTCTGATTAGCTAGTTGGTGAGGTAACGGCCCACCAAGGCGACGATCAGTAGCCGGACTGAGAGGTTGGCCGGCCACATTGGGACTGAGATACGG	ASV97	97	K_Bacteria	P_Firmicutes	C_Clostridia	O_Clostridiales	F_Ruminococcaceae	G_Oscillibacter	ASV97	82
ASV98	ACGCTGGCGGCATGCCTAACACATGCAAGTCGAACGGGGTTTATATAGCGGAACTCTTCGGAGGGAAGCCGTATAAACCTAGTGGCGGACGGGTGAGTAACGCGTGGGGAACCTGCCCTGTACCGGGGGACAACAGCCAGAAATGGCTGCTAATACCGCATAATCCTGCACTACCGCATGGTGGTGCAGGGAAAACTCCGGTGGTACAGGATGGCCCCGCGTCTGATTAGCTTGTTGGCGGGGTAACGGCCCACCAAGGCAACGATCAGTAGCCGGCTTGAGAGAGTGAACGGCCACATTGGGACTGAGACACGG	ASV98	98	K_Bacteria	P_Firmicutes	C_Clostridia	O_Clostridiales	F_Lachnospiraceae	unclassified_F_Lachnospiraceae	ASV98	83
ASV99	ACGCTGGCGGCGTGCCTAACACATGCAAGTCGAACGAAGCATGCCGGAGGAAGTTTTCGGATGGAATCCGGGATGACTGAGTGGCGGACGGGTGAGTAACGCGTGGGTAACCTGCCCTGTACAGGGGGACAACAGTTAGAAATGACTGCTAATACCGCATAAGCGCACAGGACCGCATGGTCCGGTGTGAAAAACTCCGGTGGTACAGGATGGACCCGCGTCTGATTAGGTAGTTGGCGGGGTAACGGCCCACCAAGCCGACGATCAGTAGCCGACCTGAGAGGGTGACCGGCCACATTGGGACTGAGACACGG	ASV99	99	K_Bacteria	P_Firmicutes	C_Clostridia	O_Clostridiales	F_Lachnospiraceae	G_Clostridium_XlVa	ASV99	84
ASV100	ACGCTGGCGGCGTGCTTAACACATGCAAGTCGAACGGAGATATCATTTTCGAAGCGATTAGTTTACTAAGAGCGGAGATGTTGCTATCTTAGTGGCGGACGGGTGAGTAACGCGTGGGTAACCTGCCTTGCACTGGGGGATAACACTTAGAAATAGGTGCTAATACCGCATAACAGTAGGAGACGCATGTCTTTTACTTGAAAACTCCGGTGGTGTAAGATGGACCCGCGTCTGATTAGCTTGTTGGCGGGGTAACGGCCCACCAAGGCAACGATCAGTAGCCGGCCTGAGAGGGTGAACGGCCACATTGGGACTGAGACACGG	ASV100	100	K_Bacteria	P_Firmicutes	C_Clostridia	O_Clostridiales	F_Lachnospiraceae	unclassified_F_Lachnospiraceae	ASV100	85
ASV101	ACGCTGGCGGCGTGCTTAACACATGCAAGTCGAACGGAGCGCCTATGAAGGAGATTTCGGTCAACGGAATAGGTTGCTTAGTGGCGGACGGGTGAGTAACGCGTGAGGAACCTGCCTTTCAGAGGGGGACAACAGTTGGAAACGACTGCTAATACCGCATAACACATAGGTGTCGCATGGCATTTATGTCAAAGATTTATCGCTGAAAGATGGCCTCGCGTCTGATTAGCTAGTTGGTGAGGTAACGGCTCACCAAGGCGACGATCAGTAGCCGGACTGAGAGGTTGGCCGGCCACATTGGGACTGAGATACGG	ASV101	101	K_Bacteria	P_Firmicutes	C_Clostridia	O_Clostridiales	F_Ruminococcaceae	G_Oscillibacter	ASV101	86
ASV102	ACGCTGGCGGCATGCCTAACACATGCAAGTCGAACGGGGTTTATATGACGGAACTCTCCGGAGGGAAGATATATAAACCTAGTGGCGGACGGGTGAGTAACGCGTGGGCAACCTGCCCTGTACCGGGGGACAACAGCCAGAAATGGCTGCTAATACCGCATAAGCCTGCTGTGCCTCATGGCACAGCAGGGAAAACCACGGTGGTACAGGATGGGCCCGCGTCTGATTAGTTAGTTGGCAGGGTAACGGCCTACCAAGACAACGATCAGTAGCCGGCTTGAGAGAGTGGACGGCCACATTGGGACTGAGACACGG	ASV102	102	K_Bacteria	P_Firmicutes	C_Clostridia	O_Clostridiales	F_Lachnospiraceae	unclassified_F_Lachnospiraceae	ASV102	87
ASV108	ACGCTGGCGGCGTGCCTAACACATGCAAGTCGAACGGGGTTATTTAGGAAATTTCCTTCGGGGAATGGAATCTTTAACCTAGTGGCGGACGGGTGAGTAACGCGTGAGCAATCTGCCTTCGGATGGGGGATAACAGCCGGAAACGGCTGCTAATACCGCATAACACATGGGATCCGCATGTTTCCCATGTCAAAGATTTATCGTCCGGAGATGAGCTCGCGTCTGATTAGCTGGTTGGCGGGGTAACGGCCCACCAAGGCGACGATCAGTAGCCGGACTGAGAGGTTGAACGGCCACATTGGGACTGAGACACGG	ASV108	108	K_Bacteria	P_Firmicutes	C_Clostridia	O_Clostridiales	F_Ruminococcaceae	G_Butyricicoccus	ASV108	91
ASV109	ACGCTAGCGGCAGGCTTAACACATGCAAGTCGAGGGGCAGCATGGGGAGTAGCAATACTCTCTGATGGCGACCGGCGCAAGGGTGCGTAACGCGTGAGCAACTTGCCCTCATCAGGGGAATAATCGCTGGAAACGGCGTCTAATGCCCCATGGTGATGTCCTCAGGCATCTGAGGTCATCTAAAGATCCGTCGGATGAGGATAGGCTCGCGTGACATTAGCTAGACGGCGGGGTAACGGCCCACCGTGGCGACGATGTCTAGGGGTTCTGAGAGGAAGGTCCCCCACACTGGAACTGAGACACGG	ASV109	109	K_Bacteria	P_Bacteroidetes	C_Bacteroidia	O_Bacteroidales	unclassified_O_Bacteroidales	unclassified_O_Bacteroidales	ASV109	92
ASV111	ACGCTAGCGGCAGGCTTAACACATGCAAGTCGAGGGGCAGCGAGTAAATTGCTTGCAATTTACGTCGGCGACCGGCGCACGGGTGCGTAACGCGTATGCAACCTACCCATTACAGGGGGATAACACTGAGAAATCGGTACTAATACCCCATAACATCCAGGGAGGCATCTTCTTGGGTTGAAAACTCCGGTGGTGATGGATGGGCATGCGTTGTATTAGTTAGTTGGTGAGGTAACGGCTCACCAAGACGACGATACATAGGGGGACTGAGAGGTTAACCCCCCACATTGGTACTGAGACACGG	ASV111	111	K_Bacteria	P_Bacteroidetes	C_Bacteroidia	O_Bacteroidales	F_Rikenellaceae	G_Alistipes	ASV111	94
ASV113	ACGCTAGCGGCAGGCTTAACACATGCAAGTCGAGGGGCAGCATGGGGAGTAGCAATACTCTCTGATGGCGACCGGCGCAAGGGTGCGTAACGCGTGAGCAACTTGCCCTCATCAGGGGAATAATCGCTGGAAACGGCGTCTAATGCCCCATGGTGATGTCCTCAGGCATCTGAGGTCATCTAAAGATCCGTCGGATGGGGATAGGCTCGCGTGACATTAGCTAGACGGCGGGGTAACGGCCCACCGTGGCGACGATGTCTAGGGGTTCTGAGAGGAAGGTCCCCCACACTGGAACTGAGACACGG	ASV113	113	K_Bacteria	P_Bacteroidetes	C_Bacteroidia	O_Bacteroidales	unclassified_O_Bacteroidales	unclassified_O_Bacteroidales	ASV113	96
ASV115	ACGCTGGCGGCGTGCCTAACACATGCAAGTCGAACGGGGTCTTAGTGCGGAAGTTTTCGGATGGAAGGATTAAGACTTAGTGGCGGACGGGTGAGTAACGCGTGGGTAACCTGCCCTGTACAGGGGGATAACAGTTGGAAACGGCTGCTAAAACCGCATAACATGGAGATACCGCATGATATTTCCATCAAATATTTATAGGTACAGGATGGGCCCGCGTCTGATTAGCCAGTTGGCAGGGTAATGGCCTACCAAAGCGACGATCAGTAGCCGGCTTGAGAGAGTGACCGGCCACATTGGGACTGAGACACGG	ASV115	115	K_Bacteria	P_Firmicutes	C_Clostridia	O_Clostridiales	F_Lachnospiraceae	unclassified_F_Lachnospiraceae	ASV115	98
ASV119	ACGCTGGCGGCATGCCTAACACATGCAAGTCGAACGGGGTTTATATAACAGAACTCTTCGGAGGGAAGTTATATAAACCTAGTGGCGGACGGGTGAGTAACGCGTGGGGAACCTGCCCTGTACCGGGGGACAACAGCCAGAAATGGCTGCTAATACCGCATAACCCTGCACTGCCGCATGGCGGTGCAGGGAAAACTCCGGTGGTACAGGATGGCCCCGCGTCTGATTAGCTTGTTGGCGGGGTAACGGCCCACCAAGGCAACGATCAGTAGCCGGCTTGAGAGAGCGGACGGCCACATTGGGACTGAGACACGG	ASV119	119	K_Bacteria	P_Firmicutes	C_Clostridia	O_Clostridiales	F_Lachnospiraceae	unclassified_F_Lachnospiraceae	ASV119	100
ASV122	ACGCTAGCGGCAGGCTTAACACATGCAAGTCGAGGGGCAGCGAGTAAATTGCTTGCAATTTACGTCGGCGACCGGCGCACGGGTGCGTAACGCGTATGCAACCTACCCATTACAGGGGGATAACACTGGGAAATCGGTACTAATACCCCATAACATCCAGGGAGGCATCTTCTTGGGTTGAAAACTCCGGTGGTGATGGATGGGCATGCGTTGTATTAGTTAGTTGGTGAGGTAACGGCTCACCAAGACGACGATACATAGGGGGACTGAGAGGTTAACCCCCCACATTGGTACTGAGACACGG	ASV122	122	K_Bacteria	P_Bacteroidetes	C_Bacteroidia	O_Bacteroidales	F_Rikenellaceae	G_Alistipes	ASV122	103
ASV124	ACGCTGGCGGCGTGCCTAACACATGCAAGTCGAACGGGGCGCGCAGGCTGAGGCTTTTCGGAGCGGAAGCCGGCGCTGCCCAGTGGCGGACGGGTGAGTAACGCGTGGGCAACCTGCCCTGCACTGGGGGACAACAGCCGGAAACGGCTGCTAATACCGCATATGCCCGCAGCCCCGCATGGGGCGGCGGGGGAAGCTCCGGCGGTGCAGGATGGGCCCGCGTCTGATTAGCTTGTTGGCGGGGCAACGGCCCACCAAGGCGACGATCAGTAGCCGGCCTGAGAGGGTGGGCGGCCACATTGGGACTGAGACACGG	ASV124	124	K_Bacteria	P_Firmicutes	C_Clostridia	O_Clostridiales	unclassified_O_Clostridiales	unclassified_O_Clostridiales	ASV124	105
ASV126	ACGCTGGCGGCGTGCTTAACACATGCAAGTCGAACGGGGATGCATTAAGAAGGAGTGCTTGCATTCCGGAAGGATGTATCTTAGTGGCGGACGGGTGAGTAACGCGTGGGTAACCTGCCCCATACCGGGGGATACCACCTGGAAACAGGTGCTAATACCGCATAAGCGCACGGGAGCGCATGCTCCTGTGTGAAAAACTCCGGTGGTATGGGATGGACCCGCGTCTGATTAGCCAGTTGGCAGGGTAACGGCCTACCAAAGCGACGATCAGTAGCCGGCCTGAGAGGGTGGACGGCCACATTGGGACTGAGACACGG	ASV126	126	K_Bacteria	P_Firmicutes	C_Clostridia	O_Clostridiales	F_Lachnospiraceae	unclassified_F_Lachnospiraceae	ASV126	107
ASV130	ACGCTGGCGGCGTGCCTAACACATGCAAGTCGAACGGGGACAGACGGAAACCTAGTGAAGTCTGTCCGAGTGGCGGACGGGTGAGTAACGCGTGGATAACCTGCCGCATGCAGGGGGATACCGGCTGGAAACAGCCGCTAATACCGCATAAGCGCACGGTGCCGCATGGCAGAGTGCGAAAAGGAGAAATCCGGCAAGCGATGGATCCGCGTCCGATTAGCCAGTTGGCGGGGTAAGGGCCCACCAAAGCGACGATCGGTAGCCGGCCTGAGAGGGCGGACGGCCACATTGGGACTGAGACACGG	ASV130	130	K_Bacteria	P_Firmicutes	C_Clostridia	O_Clostridiales	F_Lachnospiraceae	unclassified_F_Lachnospiraceae	ASV130	111
ASV133	ACGCTGGCGGCGTGCTTAACACATGCAAGTCGAACGAAGCGGCTGCAGGGATTCCCTTCGGGGAGGAACAGTAGCTGTCTGAGTGGCGGACGGGTGAGTAACGCGTGGGCAACCTGCCCCATACCGGGGGATAACAGCCGGAAACGGCTGCTAATACCGCATACGCCCAGGAGGCTGCATAGCTTCCTGGGGAAAACTCCGGTGGTATGGGATGGGCCCGCGTCTGATTAGCTCGTTGGCGGGGTAACGGCCCACCAAGGCGACGATCAGTAGCCGGCCTGAGAGGGCGGCCGGCCACATTGGGACTGAGACACGG	ASV133	133	K_Bacteria	P_Firmicutes	C_Clostridia	O_Clostridiales	F_Lachnospiraceae	unclassified_F_Lachnospiraceae	ASV133	112
ASV135	ACGCTAGCGACAGGCTTAACACATGCAAGTCGAGGGGCAGCGGGTAGATGAGCTTGCTCATTTATGCCGGCGACCGGCGCACGGGTGAGTAACACGTATGCAACCTGCCCGTCTCAGGGGGATAATCGTCGGAAACGGCGTCTAATACCCCGTATGAAGCTGGACGGCATCGTCTGGTTTTGAAAGAATATCGGAGACGGATGGGCATGCGGCGCATTAGCTAGTTGGCGGGGTAACGGCCCACCAAGGCGACGATGCGTAGGGGTTCTGAGAGGAAGGTCCCCCACACTGGTACTGAGACACGG	ASV135	135	K_Bacteria	P_Bacteroidetes	C_Bacteroidia	O_Bacteroidales	unclassified_O_Bacteroidales	unclassified_O_Bacteroidales	ASV135	114
ASV139	ACGCTGGCGGCGTGCTTAACACATGCAAGTCGAACGAAGCACTGGAGAACGAATCTTCGGAGGAAGTCTCCTTTGACTGAGTGGCGGACGGGTGAGTAACGCGTGGGTAACCTGCCTCACACAGGGGGATAACAGTTGGAAACGACCGCTAATACCGCATAAGCCGGAAGGATCGCATGATCCGGCCGGAAAAGATTTATCGGTGTGAGATGGACCCGCGTCTGATTAGCCAGTTGGCAGGGTAACGGCCTACCAAAGCGACGATCAGTAGCCGGCCTGAGAGGGTGAACGGCCACATTGGGACTGAGACACGG	ASV139	139	K_Bacteria	P_Firmicutes	C_Clostridia	O_Clostridiales	F_Lachnospiraceae	G_Roseburia	ASV139	117
ASV142	ACGCTAGCGACAGGCTTAACACATGCAAGTCGAGGGGCAGCGGGGAGTGAGGCTTGCCTTACTTTGCCGGCGACCGGCGCACGGGTGAGTAACACGTATGCAACCTACCCTTTACAGCGGGATAACCGGAAGAAATTTCGCCTAATACCGCATATACTCCTTGGGAGGCATCTTCCGAGGGGGAAAGAATTTCGGTGAAGGATGGGCATGCGTCGCATTAGTTAGTTGGCGGTGTAACGGACCACCAAGACGACGATGCGTAGGGGTTCTGAGAGGAAGGTCCCCCACACTGGTACTGAGACACGG	ASV142	142	K_Bacteria	P_Bacteroidetes	C_Bacteroidia	O_Bacteroidales	unclassified_O_Bacteroidales	unclassified_O_Bacteroidales	ASV142	119
ASV145	ACGCTGGCGGCGTGCTTAACACATGCAAGTCGAATGTAGTTTACTACATGGCGGACGGGTGAGTAATGCGTGAGCAACCTGCCCATATCTGGGGGATAACAGTTGGAAACGACTGATAATACCGCATAATATGGTTAGAAGGCATCTTCTTTCCATCAAAGATTTATCGGATATGGATGGGCTCGCGTCTGATTAGGCTGTTGGTGAGGTAACGGCTCACCAAACCGACGATCAGTAGCCGACCTGAGAGGGTGATCGGCCACATTGGAACTGAGACACGG	ASV145	145	K_Bacteria	P_Firmicutes	C_Clostridia	O_Clostridiales	unclassified_O_Clostridiales	unclassified_O_Clostridiales	ASV145	121
ASV151	ACGCTGGCGGCGTGCTTAACACATGCAAGTCGAACGAAGCACTTTACCTTGATTCCTTCGGGTTGATTGGTACTGTGACTGAGTGGCGGACGGGTGAGTAACGCGTGGGTAACCTGCCCCATACAGGGGGATAACAGATAGAAATGTCTGCTAATACCGCATAAGACCACAGCGCCGCATGGCGCAGGGGTAAAAACTCCGGTGGTATGGGATGGACCCGCGTCTGATTAGCTAGTTGGTGGGGTAAAGGCCCACCAAGGCGACGATCAGTAGCCGACCTGAGAGGGTGACCGGCCACATTGGGACTGAGACACGG	ASV151	151	K_Bacteria	P_Firmicutes	C_Clostridia	O_Clostridiales	F_Lachnospiraceae	G_Ruminococcus2	ASV151	123
ASV155	ACGCTGGCGGCGTGCTTAACACATGCAAGTCGAACGAAGCGGTTAGAAGGAAGTTTTCGGATGGAATTCTGATTGACTGAGTGGCGGACGGGTGAGTAACGCGTGGGTAACCTGCCTCATACAGGGGGATAACAGTTAGAAATGACTGCTAATACCGCATAAGCGCACAGGATTGCATGATTCGGTGTGAAAAACTCCGGTGGTATGAGATGGACCCGCGTCTGATTAGCTGGTTGGTGGGGTAACGGCCCACCAAGGCGACGATCAGTAGCCGACCTGAGAGGGTGACCGGCCACATTGGGACTGAGACACGG	ASV155	155	K_Bacteria	P_Firmicutes	C_Clostridia	O_Clostridiales	F_Lachnospiraceae	G_Clostridium_XlVa	ASV155	127
ASV156	ACGCTGGCGGCGTGCCTAATACATGCAAGTCGAGCGAACAGACGAGGAGCTTGCTCCTCTGACGTTAGCGGCGGACGGGTGAGTAACACGTGGATAACCTACCTATAAGACTGGGATAACTTCGGGAAACCGGAGCTAATACCGGATAATATATTGAACCGCATGGTTCAATAGTGAAAGACGGTTTTGCTGTCACTTATAGATGGATCCGCGCCGCATTAGCTAGTTGGTAAGGTAACGGCTTACCAAGGCAACGATGCGTAGCCGACCTGAGAGGGAGATCGGCCACACTGGAACTGAGACACGG	ASV156	156	K_Bacteria	P_Firmicutes	C_Bacilli	O_Bacillales	F_Staphylococcaceae	G_Staphylococcus	ASV156	128
ASV158	ACGCTGGCGGCGTGCTTAACACATGCAAGTCGAACGGAGCACCCCTGAAGGAGTTTTCGGACAACGGAAGGGAATGCTTAGTGGCGGACTGGTGAGTAACGCGTGAGGAACCTGCCTTTCAGAGGGGGACAACAGTTGGAAACGACTGCTAATACCGCATGATGTATCGGAATCGCATGGTACTGATACCAAAGATTTATCGCTGAAAGATGGCCTCGCGTCTGATTAGCTAGTTGGTGAGGTAACGGCCCACCAAGGCGACGATCAGTAGCCGGACTGAGAGGTTGACCGGCCACATTGGGACTGAGATACGG	ASV158	158	K_Bacteria	P_Firmicutes	C_Clostridia	O_Clostridiales	F_Ruminococcaceae	G_Oscillibacter	ASV158	130
ASV166	ACGCTGGCGGCGTGCTTAACACATGCAAGTCGAACGGACCCATATTGAAACCTAGTGATATATGGGTTAGTGGCGGACGGGTGAGTAACGCGTGGGTAACCTGCCTTACACAGGGGGATAACACTTAGAAATAGGTGCTAAAACCGCATAAGCGCACAGCTTCGCATGAAGCGGTGTGAAAAACTCCGGTGGTGTAAGATGGACCCGCGTCTGATTAGCTTGTTGGCGGGGTAACGGCCCACCAAGGCGACGATCAGTAGCCGGCCTGAGAGGGCGGACGGCCACATTGGGACTGAGACACGG	ASV166	166	K_Bacteria	P_Firmicutes	C_Clostridia	O_Clostridiales	F_Lachnospiraceae	unclassified_F_Lachnospiraceae	ASV166	137
ASV169	ACGCTGGCGGCGTGCCTAACACATGCAAGTCGAGCGAAGCGATTTTGAGGAAGTTTTCGGATGGAATTGAAATTGACTTAGCGGCGGACGGGTGAGTAACACGTGGGTAATCTGCCTTATACAGGGGGATAACAGTTAGAAATGACTGCTAATACCGCATAAGCGCACGGGGACGCATGTTTCTGTGTGAAAAACTCCGGTAGTATAAGATGAGCCCGCGTCTGATTAGCTGGTTGGTGGGGTAACGGCCTACCAAGGCGACGATCAGTAGCCGGCCTGAGAGGGTGAACGGCCACATTGGGACTGAGACACGG	ASV169	169	K_Bacteria	P_Firmicutes	C_Clostridia	O_Clostridiales	F_Lachnospiraceae	G_Hungatella	ASV169	139
ASV170	ACGCTGGCGGCGTGCTTAACACATGCAAGTCGAACGAAGCGATTGGAAGGAAGTTTTCGGATGGAATTCTGATTGACTGAGTGGCGGACGGGTGAGTAACGCGTGGGTAACCTGCCTCATACAGGGGGATAACAGTTAGAAATGACTGCTAATACCGCATAAGCGCACAGGATTGCATGATCCAGTGTGAAAAACTCCGGTGGTATGAGATGGACCCGCGTCTGATTAGCTGGTTGGCGGGGTAACGGCCCACCAAGGCGACGATCAGTAGCCGACCTGAGAGGGTGACCGGCCACATTGGGACTGAGACACGG	ASV170	170	K_Bacteria	P_Firmicutes	C_Clostridia	O_Clostridiales	F_Lachnospiraceae	G_Clostridium_XlVa	ASV170	140
ASV173	ACGCTGGCGGCGTGCCTAACACATGCAAGTCGAACGGACTTAATATGAAACCTAGTGATTGTTAAGTTAGTGGCGGACGGGTGAGTAACGCGTGGATAACCTGCCGTATGCAGGGGGATAACAGTTGGAAACAGCTGCTAATACCGCATAAGCGCACGGTGCCGCATGGTACAGTGCGAAAAGATTTATCGGCATACGATGGATCCGCGTCCGATTAGCCAGTTGGCGGGGTAACGGCCCACCAAAGCGACGATCGGTAGCCGGCCTGAGAGGGCGGACGGCCACATTGGGACTGAGACACGG	ASV173	173	K_Bacteria	P_Firmicutes	C_Clostridia	O_Clostridiales	F_Lachnospiraceae	G_Acetatifactor	ASV173	141
ASV180	ACGCTGGCGGCGTGCTTAACACATGCAAGTCGAACGAAGCGATTGGAAGGAAGTTTTCGGATGGAATTCTGATTGACTGAGTGGCGGACGGGTGAGTAACGCGTGGGTAACCTGCCTCATACAGGGGGATAACAGTTAGAAATGACTGCTAATACCGCATAAGCGCACAGGATTGCATGATCCGGTGTGAAAAACTCCGGTGGTATGAGATGGACCCGCGTCTGATTAGCTGGTTGGTGGGGTAACGGCCCACCAAGGCGACGATCAGTAGCCGACCTGAGAGGGTGACCGGCCACATTGGGACTGAGACACGG	ASV180	180	K_Bacteria	P_Firmicutes	C_Clostridia	O_Clostridiales	F_Lachnospiraceae	G_Clostridium_XlVa	ASV180	146
ASV181	ACGCCGGCGGTGTGCCTAATACATGCAAGTCGTACGCACTGGCCCAACTGATTGATGGTGCTTGCACCTGATTGACGTTGGATCACCAGTGAGTGGCGGACGGGTGAGTAACACGTAGGTAACCTGCCCCGGAGCGGGGGATAACATTTGGAAACAGATGCTAATACCGCATAACAACAAAAGCCACATGGCTTTTGTTTGAAAGATGGCCTTGGCTATCACTCTGGGATGGACCTGCGGTGCATTAGCTAGTTGGTAAGGTAACGGCTTACCAAGGCGATGATGCATAGCCGAGTTGAGAGACTGATCGGCCACAATGGAACTGAGACACGG	ASV181	181	K_Bacteria	P_Firmicutes	C_Bacilli	O_Lactobacillales	F_Lactobacillaceae	G_Lactobacillus	ASV181	147
ASV184	ACGCTGGCGGCGTGCTTAACACATGCAAGTCGAGCGAAGCACTTTGTTTTGAATCTTCGGAGGAAGAACGAAGTGACTGAGCGGCGGACGGGTGAGTAACGCGTGGGCAACCTGCCTCATACAGGGGGATAACAGTTAGAAATGACTGCTAATACCGCATAAGACCACGGTACTGCATGGTACAGTGGTAAAAACTCCGGTGGTATGAGATGGGCCCGCGTCTGATTAGCTGGTTGGTGAGGTAACGGCTCACCAAGGCAACGATCAGTAGCCGACCTGAGAGGGCGACCGGCCACATTGGGACTGAGACACGG	ASV184	184	K_Bacteria	P_Firmicutes	C_Clostridia	O_Clostridiales	F_Lachnospiraceae	G_Dorea	ASV184	149
ASV197	ACGCTGGCGGCGTGCCTAACACATGCAAGTCGAACGGGCTCGGATTGAAACCTAGTGATTTCCGAGTTAGTGGCGGACGGGTGAGTAACGCGTGGATAACCTGCCGTATGCAGGGGGATAACAGTTGGAAACAGCTGCTAATACCGCATAAGCGCACAGTACCGCATGGTACGGTGTGAAAAGATTTATCGGCATACGATGGATCCGCGTCCGATTAGCCAGTTGGCGGGGTAACGGCCCACCAAAGCGACGATCGGTAGCCGGCCTGAGAGGGCGGACGGCCACATTGGGACTGAGACACGG	ASV197	197	K_Bacteria	P_Firmicutes	C_Clostridia	O_Clostridiales	F_Lachnospiraceae	G_Acetatifactor	ASV197	157
ASV212	ACGCTGGCGGCGTGCCTAACACATGCAAGTCGAACGGGGCGTGCCGATGGAAACTTTTCGGAGCGGAAATTGGCGCTGCCTAGTGGCGGACGGGTGAGTAACGCGTGAGCAACCTGCCCTGCACTGGGGGACAACAGCCGGAAACGGCTGCTAATACCGCATAGGCGCACAGCCCTGCATGGGGCGGTGTGGAAAGTAATACGGTGCAGGATGGGCTCGCGTCTGATTAGCTTGTTGGCGGGGCAACGGCCCACCAAGGCGACGATCAGTAGCCGGCCTGAGAGGGTGGACGGCCACATTGGGACTGAGACACGG	ASV212	212	K_Bacteria	P_Firmicutes	C_Clostridia	O_Clostridiales	unclassified_O_Clostridiales	unclassified_O_Clostridiales	ASV212	167
ASV216	ACGCTGGCGGCGTGCTTAACACATGCAAGTCGAGCGAAGCGCTTTTTTAGAACTCTTCGGAGGGAAGAGAGGGTGACTTAGCGGCGGACGGGTGAGTAACGCGTGGGCAACCTGCCTTACACAGGGGGATAACAATTAGAAATGATTGCTAATACCGCATAAGACCCCGGTACCGCATGGTACAGAGGTAAAAACTGAGGTGGTGTAAGATGGGCCCGCGTCTGATTAGGTAGTTGGTGGGGTAGAAGCCTACCAAGCCGACGATCAGTAGCCGACCTGAGAGGGCGACCGGCCACATTGGGACTGAGACACGG	ASV216	216	K_Bacteria	P_Firmicutes	C_Clostridia	O_Clostridiales	F_Lachnospiraceae	G_Hungatella	ASV216	170
ASV229	ACGCTGGCGGCGTGCTTAACACATGCAAGTCGAACGAAGCGATCAGGAGGAAGTTTTCGGATGGAATCCGGATTGACTGAGTGGCGGACGGGTGAGTAACGCGTGGGTAACCTGCCTCATACAGGGGGATAACAGTTAGAAATGACTGCTAATACCGCATAAGCGCACAGGGACACATGTTCCGGTGTGAAAAACTCCGGTGGTATGAGATGGACCCGCGTCTGATTAGCTGGTTGGCGGGGTAACGGCCCACCAAGGCGACGATCAGTAGCCGACCTGAGAGGGTGACCGGCCACATTGGGACTGAGACACGG	ASV229	229	K_Bacteria	P_Firmicutes	C_Clostridia	O_Clostridiales	F_Lachnospiraceae	G_Clostridium_XlVa	ASV229	176
ASV234	ACGCTGGCGGCGTGCCTAATACATGCAAGTCGAACGGAGATATTCGCTGATGAAGTACTTCGGTAATGAATCTTGGATATCTTAGTGGCGGACGGGTGAGTAACGCGTGAGCAACCTGCCTTTCAGAGGGGGATAACGTTTGGAAACGAACGCTAATACCGCATGACATTATCTTATCGCATGGTAGGATAATCAAAGGAGCAATCCGCTGAAAGATGGGCTCGCGTCCGATTAGGTAGTTGGTGGGGTAACGGCCCACCAAGCCGACGATCGGTAGCCGGACTGAGAGGTTGGACGGCCACATTGGGACTGAGACACGG	ASV234	234	K_Bacteria	P_Firmicutes	C_Clostridia	O_Clostridiales	F_Ruminococcaceae	unclassified_F_Ruminococcaceae	ASV234	180
ASV238	ACGCTGGCGGCGTGCCTAACACATGCAAGTCGAGCGGAGCAATCTTGATGAAGTTTTCGGATGGAATCAGGATTGTCTTAGCGGCGGACGGGTGAGTAACACGTGGATAACCTGCCTTATACTGGGGGATAACAGCCAGAAATGGCTGCTAATACCGCATAAGCGCACGGCGCCGCATGGCGCAGTGTGAAAAACTCCGGTGGTATAAGATGGATCCGCGCCTGATTAGCTAGTTGGCGGGGCAGCGGCCCACCAAGGCGACGATCAGTAGCCGGCCTGAGAGGGCGACCGGCCACATTGGGACTGAGACACGG	ASV238	238	K_Bacteria	P_Firmicutes	C_Clostridia	O_Clostridiales	F_Lachnospiraceae	G_Marvinbryantia	ASV238	184
ASV243	ACGCTAGCTACAGGCTTAACACATGCAAGTCGAGGGGCAGCATGGCCTATCTTTCGGGATGGGTCGATGGCGACCGGCGCACGGGTGAGTAACGCGTATCCAACCTTCCCTTTACTGGGGTCCAGCCCGTCGAAAGGCGGATTAATCCCCCATGTTCTCCGTCCCGGACATCTGTGTCGGAGCAAAGATTTATCGGTAAAGGATGGGGATGCGTCCGATTAGCTTGTTGGCGGGGTAACAGCCCACCAAGGCATCGATCGGTAGGGGTTCTGAGAGGAAGGTCCCCCACACTGGAACTGAGACACGG	ASV243	243	K_Bacteria	P_Bacteroidetes	C_Bacteroidia	O_Bacteroidales	F_Prevotellaceae	unclassified_F_Prevotellaceae	ASV243	188
ASV246	ACGCTGGCGGCGTGCCTAACACATGCAAGTCGAACGGGCTTAACATGAAACCTAGTGATTGTTAAGTTAGTGGCGGACGGGTGAGTAACGCGTGGATAACCTGCCGTATGCAGGGGGATAACAGTTGGAAACAGCTGCTAATACCGCATAAGCGCACAGTACCGCATGGTACGGTGTGAAAAGATTTATCGGCATACGATGGATCCGCGTCCGATTAGCCAGTTGGCGGGGTAACGGCCCACCAAAGCGACGATCGGTAGCCGGCCTGAGAGGGCGGACGGCCACATTGGGACTGAGACACGG	ASV246	246	K_Bacteria	P_Firmicutes	C_Clostridia	O_Clostridiales	F_Lachnospiraceae	G_Acetatifactor	ASV246	190
ASV248	ACGCTGGCGGCGTGCCTAACACATGCAAGTCGAACGTGCCTGTGCGGAAACCTAGTGAAGCGCAGGCAAGTGGCGGACGGGTGAGTAACGCGTGGGTAACCTGCCGTATACAGGGGGATAACAGCCGGAAACGGCTGCTAAGACCGCATAAGCGCACGGCACCGCATGGTGCAGTGTGAAAAGCTCCGGTGGTATACGATGGACCCGCGTCTGATTAGCCAGTTGGCAGGGTAACGGCCTACCAAAGCGACGATCAGTAGCCGGCCTGAGAGGGTGGACGGCCACATTGGGACTGAGACACGG	ASV248	248	K_Bacteria	P_Firmicutes	C_Clostridia	O_Clostridiales	F_Lachnospiraceae	unclassified_F_Lachnospiraceae	ASV248	192
ASV264	ACGCTAGCGGCAGGCTTAACACATGCAAGTCGAGGGGCAGCGAGTAAATTGCTTGCAATTTATGTCGGCGACCGGCGGACGGGTGCGTAACGCGTATGCAACCTACCCATTACAGGGGGATAACACTGAGAAATCGGTACTAATACCCCATAACATCAGAGGAGGCATCTCCTTTGGTTGAAAACTCCGGTGGTAATGGATGGGCATGCGTTGTATTAGTTAGTTGGTGTGGTAACGGCTCACCAAGACTACGATACATAGGGGGACTGAGAGGTTAACCCCCCACATTGGTACTGAGACACGG	ASV264	264	K_Bacteria	P_Bacteroidetes	C_Bacteroidia	O_Bacteroidales	F_Rikenellaceae	G_Alistipes	ASV264	205
ASV281	ACGCTGGCGGCGTGCCTAACACATGCAAGTCGAACGGACTCGGATTGAAACCTAGTGATTTCCGAGTTAGTGGCGGACGGGTGAGTAACGCGTGGATAACCTGCCGTATGCAGGGGGATAACAGTTGGAAACAGCTGCTAATACCGCATAAGCGCACAATACCGCATGGTACTGTGTGAAAAGATTTATCGGCATACGATGGATCCGCGTCCGATTAGCCAGTTGGCGGGGTAACGGCCCACCAAAGCGACGATCGGTAGCCGGCCTGAGAGGGCGGACGGCCACATTGGGACTGAGACACGG	ASV281	281	K_Bacteria	P_Firmicutes	C_Clostridia	O_Clostridiales	F_Lachnospiraceae	unclassified_F_Lachnospiraceae	ASV281	214
ASV293	ACGCTGGCGGCGTGCTTAACACATGCAAGTCGAGCGAAGCACTTTGTTTTGAATCTTCGGAGGAAGAACGAAGTGACTGAGCGGCGGACGGGTGAGTAACGCGTGGGCAACCTGCCTCATACAGGGGGATAACAGTTAGAAATGACTGCTAATACCGCATAAGACCACGGTACTGCATGGTACAGTGGTAAAAACTCCGGTGGTATGAGATGGGCCCGCGTCTGATTAGCTGGTTGGTGAGGTAACGGCTCACCAAGGCAACGATCAGTAGCCGACCTGAGAGGGTGACCGGCCACATTGGGACTGAGACACGG	ASV293	293	K_Bacteria	P_Firmicutes	C_Clostridia	O_Clostridiales	F_Lachnospiraceae	G_Dorea	ASV293	224
ASV370	ACGCTGGCGGCGTGCCTAACACATGCAAGTCGAGCGGAGCGATCTTGATGAAGTTTTCGGATGGAATCAGGATTGACTTAGCGGCGGACGGGTGAGTAACACGTGGATAACCTGCCTTATACTGGGGGATAACAGCCAGAAATGGCTGCTAATACCGCATAAGCGCACGGCGCCGCATGGCGCAGTGTGAAAAACTCCGGTGGTATAAGATGGATCCGCGCCTGATTAGCTAGTTGGCGGGGCAGCGGCCCACCAAGGCGACGATCAGTAGCCGGCCTGAGAGGGCGACCGGCCACATTGGGACTGAGACACGG	ASV370	370	K_Bacteria	P_Firmicutes	C_Clostridia	O_Clostridiales	F_Lachnospiraceae	G_Marvinbryantia	ASV370	275
ASV376	ACGCTGGCGGCGTGCTTAACACATGCAAGTCGAACGGAGCACCCCAGAAGGAGTTTTCGGACAACGGATGGGAATGCTTAGTGGCGGACTGGTGAGTAACGCGTGAGGAACCTGCCTTCCAGAGGGGGACAACAGTTGGAAACGACTGCTAATACCGCATGATGCGTTGGAGCCGCATGACTCCGACGTCAAAGATTTATCGCTGGAAGATGGCCTCGCGTCTGATTAGCTAGTTGGTGAGGTAACGGCCCACCAAGGCGACGATCAGTAGCCGGACTGAGAGGTTGGCCGGCCACATTGGGACTGAGATACGG	ASV376	376	K_Bacteria	P_Firmicutes	C_Clostridia	O_Clostridiales	F_Ruminococcaceae	G_Oscillibacter	ASV376	280
ASV396	ACGCTGGCGGCGTGCTTAACACATGCAAGTCGAGCGAAGCGCTTTTTTAGAACTCTTCGGAGGGAAGAGAGGGTGACTTAGCGGCGGACGGGTGAGTAACGCGTGGGCAACCTGCCTTACACAGGGGGATAACAATTAGAAATGATTGCTAATACCGCATAAGACCCCAGTGCCGCATGGTACAGGGGTAAAAACTGAGGTGGTGTAAGATGGGCCCGCGTCTGATTAGGTAGTTGGTGGGGTAGAAGCCTACCAAGCCGACGATCAGTAGCCGACCTGAGAGGGCGACCGGCCACATTGGGACTGAGACACGG	ASV396	396	K_Bacteria	P_Firmicutes	C_Clostridia	O_Clostridiales	F_Lachnospiraceae	G_Hungatella	ASV396	291
ASV746	ACGCTGGCGGCGTGCTTAACACATGCAAGTCGAACGGGGTGCCTTTGACAGAGGATTCGTCCAATGGATAAGGTTACCTAGTGGCGGACGGGTGAGTAACCCGTGAGTAACCTGCCCTGGAGTGGGGAATAACAGCTGGAAACAGCTGCTAATACCGCATAATGCAGTTGGGTCGCATGGCTCTGACTGCCAAAGATTTATCGCTCTGGGATGGACTCGCGTCTGATTAGCTAGTTGGTGGGGCAACGGCCCACCAAGGCGACGATCAGTAGCCGGACTGAGAGGTTGGCCGGCCACATTGGGACTGAGACACGG	ASV746	746	K_Bacteria	P_Firmicutes	C_Clostridia	O_Clostridiales	F_Ruminococcaceae	G_Flavonifractor	ASV746	445
