# Supplementary material for: Key features of the genetic architecture and evolution of host-microbe interactions revealed by high-resolution genetic mapping of the mucosa-associated gut microbiome in hybrid mice
Source: eLife. 2022 Jul 19;11:e75419. doi: 10.7554/eLife.75419 (PMC9307277; doi:10.7554/eLife.75419)
Supplement: Supplementary file 7. [file elife-75419-supp7.xlsx]

## Sheet: 79_most_promising
Gene	Closest to SNP	Diff. expressed in GF	In other studies	Hub genes network snps	First neighbours hubs snps network	Hub genes network diff. expression	First neighbours hub genes network diff. expression	Number of overlaps with other studies	P type	Min P	Min interval (Mb)	Number of taxa intervals	Taxa interval	Number of taxa marker	Taxa marker	Chr	Start_position	End_position	Ensembl_gene_id	Description
Igfbp5	X	-	X	-	X	-	-	1	add.P	1.33e-14	9177089	4	DNA : ASV17 | RNA : ASV151 | RNA : ASV17 | RNA : ASV40 | RNA : ASV63	1	DNA: ASV17 | RNA: ASV17	1	72857932	72874884	ENSMUSG00000026185	insulin-like growth factor binding protein 5 [Source:MGI Symbol;Acc:MGI:96440]
Agfg1	X	-	-	-	-	-	-	0	add.P	3.03e-13	22303105	1	DNA : ASV17	1	DNA: ASV19	1	82839483	82901182	ENSMUSG00000026159	ArfGAP with FG repeats 1 [Source:MGI Symbol;Acc:MGI:1333754]
Spp2	X	-	-	-	X	-	-	0	add.P	4.2e-17	3848574	4	DNA : ASV17 | RNA : G_Marvinbryantia | RNA : ASV26 | RNA : ASV370	1	RNA: ASV26	1	88406961	88426438	ENSMUSG00000026295	secreted phosphoprotein 2 [Source:MGI Symbol;Acc:MGI:1922646]
Serpinc1	-	-	X	-	-	-	-	6	add.P	1.63e-15	5226100	3	DNA : G_Marvinbryantia | DNA : ASV5 | RNA : ASV158	0	NA	1	160978585	161005863	ENSMUSG00000026715	serine (or cysteine) peptidase inhibitor, clade C (antithrombin), member 1 [Source:MGI Symbol;Acc:MGI:88095]
Pbx1	X	-	X	-	-	-	-	2	add.P	1.63e-15	75766	4	RNA : ASV115 | RNA : ASV158 | RNA : ASV158 | RNA : ASV234 | RNA : ASV234 | RNA : ASV234 | RNA : ASV370 | RNA : ASV370	1	RNA: ASV370	1	168119364	168432270	ENSMUSG00000052534	pre B cell leukemia homeobox 1 [Source:MGI Symbol;Acc:MGI:97495]
Itih2	X	-	-	-	X	-	-	0	add.P	6.34e-13	10396430	2	DNA : ASV113 | DNA : ASV113 | RNA : ASV60 | RNA : ASV60 | RNA : ASV60	2	DNA: ASV113 | RNA: ASV60	2	10094593	10131396	ENSMUSG00000037254	inter-alpha trypsin inhibitor, heavy chain 2 [Source:MGI Symbol;Acc:MGI:96619]
Kcnj3	X	-	-	-	X	-	-	0	add.P	1.07e-20	24831454	1	DNA : ASV35 | DNA : ASV35 | RNA : ASV35 | RNA : ASV35	1	DNA: ASV35 | RNA: ASV35	2	55435970	55598145	ENSMUSG00000026824	potassium inwardly-rectifying channel, subfamily J, member 3 [Source:MGI Symbol;Acc:MGI:104742]
Fbn1	X	-	-	-	X	-	-	0	add.P	1.61e-10	100098	2	RNA : unclassified_P_Bacteroidetes | RNA : ASV45	1	RNA: ASV45	2	125300594	125507993	ENSMUSG00000027204	fibrillin 1 [Source:MGI Symbol;Acc:MGI:95489]
Plcb1	X	-	-	-	X	-	-	0	add.P	3.87e-11	7837006	2	RNA : unclassified_P_Bacteroidetes | RNA : ASV142 | RNA : ASV142 | RNA : ASV142	1	RNA: ASV142	2	134786067	135475258	ENSMUSG00000051177	phospholipase C, beta 1 [Source:MGI Symbol;Acc:MGI:97613]
Kif16b	X	-	-	-	-	-	-	0	add.P	1.09e-17	200498	5	DNA : F_Rikenellaceae | DNA : G_Alistipes | DNA : unclassified_P_Bacteroidetes | DNA : ASV142 | DNA : ASV21 | RNA : unclassified_P_Bacteroidetes | RNA : ASV142	4	DNA: ASV21 | ASV142 | G_Alistipes | DNA: ASV142 | G_Alistipes | ASV21 | F_Rikenellaceae	2	142617474	142901531	ENSMUSG00000038844	kinesin family member 16B [Source:MGI Symbol;Acc:MGI:1098240]
Mmp9	-	-	X	-	-	-	-	6	add.P	2.42e-18	1521666	7	DNA : F_Rikenellaceae | DNA : G_Alistipes | DNA : ASV145 | DNA : ASV21 | DNA : ASV23 | RNA : ASV22 | RNA : ASV36	0	NA	2	164940780	164955850	ENSMUSG00000017737	matrix metallopeptidase 9 [Source:MGI Symbol;Acc:MGI:97011]
Cd40	-	-	X	-	-	-	-	6	add.P	2.42e-18	1521666	7	DNA : F_Rikenellaceae | DNA : G_Alistipes | DNA : ASV145 | DNA : ASV21 | DNA : ASV23 | RNA : ASV22| RNA : ASV36	0	NA	2	165055627	165072948	ENSMUSG00000017652	CD40 antigen [Source:MGI Symbol;Acc:MGI:88336]
Ncoa3	X	-	X	-	-	-	-	6	add.P	1.21e-13	8367748	4	DNA : ASV23 | RNA : ASV22 | RNA : ASV32 | RNA : ASV36	2	RNA: ASV36 | ASV22	2	165992636	166073242	ENSMUSG00000027678	nuclear receptor coactivator 3 [Source:MGI Symbol;Acc:MGI:1276535]
Cyp24a1	-	-	X	-	-	-	-	10	dom.P	1.79e-11	1304066	3	DNA : G_Eisenbergiella | DNA : ASV23 | RNA : ASV32	0	NA	2	170482708	170497145	ENSMUSG00000038567	cytochrome P450, family 24, subfamily a, polypeptide 1 [Source:MGI Symbol;Acc:MGI:88593]
Dok5	X	-	X	-	-	-	-	10	add.P	1.79e-11	9393872	2	DNA : ASV23 | RNA : ASV32	1	DNA: G_Eisenbergiella	2	170731807	170879769	ENSMUSG00000027560	docking protein 5 [Source:MGI Symbol;Acc:MGI:1924079]
Mc3r	-	-	-	-	-	-	-	0	add.P	1.73e-09	15026141	1	RNA : ASV32	0	NA	2	172248492	172251114	ENSMUSG00000038537	mela-cortin 3 receptor [Source:MGI Symbol;Acc:MGI:96929]
Bmp7	X	-	X	-	-	-	-	6	dom.P	4.29e-12	483541	4	RNA : G_Anaerostipes | RNA : ASV139 | RNA : ASV32 | RNA : ASV79	3	RNA: G_Anaerostipes | ASV139 | ASV79	2	172868012	172940321	ENSMUSG00000008999	bone morphogenetic protein 7 [Source:MGI Symbol;Acc:MGI:103302]
Nhlrc3	X	-	-	-	X	-	-	0	dom.P	5.51e-12	2510402	1	RNA : ASV85 | RNA : ASV85 | RNA : ASV85	1	RNA: ASV85	3	53448583	53463332	ENSMUSG00000042997	NHL repeat containing 3 [Source:MGI Symbol;Acc:MGI:2444520]
Gstm5	-	X	-	-	-	X	-	0	dom.P	3.35e-12	11572875	2	DNA : ASV142 | DNA : ASV142 | RNA : ASV142 | RNA : ASV142 | RNA : ASV142 | RNA : ASV98	0	NA	3	107895821	107898686	ENSMUSG00000004032	glutathione S-transferase, mu 5 [Source:MGI Symbol;Acc:MGI:1309466]
Enpep	X	X	-	-	-	-	-	0	add.P	6.8e-09	14296832	1	RNA : ASV151	1	RNA: ASV151	3	129269175	129332720	ENSMUSG00000028024	glutamyl ami-peptidase [Source:MGI Symbol;Acc:MGI:106645]
Tacr3	X	-	X	X	-	-	-	2	dom.P	3.98e-11	538957	5	DNA : ASV45 | RNA : ASV101 | RNA : ASV151 | RNA : ASV4 | RNA : ASV82	1	RNA: ASV4	3	134829007	134934579	ENSMUSG00000028172	tachykinin receptor 3 [Source:MGI Symbol;Acc:MGI:892968]
Ptgfr	X	-	-	X	-	-	-	0	add.P	1.85e-18	11307805	3	DNA : ASV23 | RNA : ASV101 | RNA : ASV101 | RNA : ASV101 | RNA : ASV23 | RNA : ASV23 | RNA : ASV23 | RNA : ASV99 | RNA : ASV99 | RNA : ASV99	3	RNA: ASV101 | RNA: ASV99 | ASV23	3	151796502	151837630	ENSMUSG00000028036	prostaglandin F receptor [Source:MGI Symbol;Acc:MGI:97796]
Cth	-	X	-	-	-	-	-	0	dom.P	1.41e-16	4457315	2	DNA : ASV23 | RNA : ASV99	0	NA	3	157894248	157925077	ENSMUSG00000028179	cystathionase (cystathionine gamma-lyase) [Source:MGI Symbol;Acc:MGI:1339968]
Tlr4	X	-	-	-	-	-	-	0	add.P	4.48e-118	10810489	1	RNA : ASV33	3	DNA: G_Dorea | RNA: ASV184 | G_Dorea | ASV293	4	66827584	66930284	ENSMUSG00000039005	toll-like receptor 4 [Source:MGI Symbol;Acc:MGI:96824]
Cdk5rap2	X	-	-	-	-	-	-	0	add.P	4.48e-118	5447602	3	DNA : G_Dorea | RNA : G_Dorea | RNA : ASV184 | RNA : ASV293	3	DNA: G_Dorea | RNA: ASV293 | ASV184 | G_Dorea	4	70216856	70410443	ENSMUSG00000039298	CDK5 regulatory subunit associated protein 2 [Source:MGI Symbol;Acc:MGI:2384875]
Grik3	X	-	X	-	X	-	-	5	add.P	4.4e-16	2234303	3	RNA : unclassified_O_Clostridiales | RNA : ASV97 | RNA : ASV98	2	RNA: unclassified_O_Clostridiales | RNA: ASV234	4	125490700	125714173	ENSMUSG00000001985	glutamate receptor, io-tropic, kainate 3 [Source:MGI Symbol;Acc:MGI:95816]
Cort	-	-	-	-	-	-	-	0	add.P	1.8e-15	5866901	5	DNA : ASV102 | DNA : ASV38 | DNA : ASV47 | DNA : ASV50 | RNA : ASV3	0	NA	4	149125034	149126763	ENSMUSG00000028971	cortistatin [Source:MGI Symbol;Acc:MGI:109538]
Cdk14	X	-	X	-	-	-	-	1	add.P	1.67e-17	13337	3	DNA : ASV102 | DNA : ASV50 | RNA : ASV49	3	DNA: ASV102 | ASV50 | RNA: ASV49	5	4803391	5420312	ENSMUSG00000028926	cyclin-dependent kinase 14 [Source:MGI Symbol;Acc:MGI:894318]
Sparcl1	-	X	X	-	-	-	X	4	add.P	5.42e-11	5838656	4	DNA : F_Prevotellaceae | DNA : G_Paraprevotella | DNA : ASV7 | RNA : G_Acetatifactor	0	NA	5	104079111	104113733	ENSMUSG00000029309	SPARC-like 1 [Source:MGI Symbol;Acc:MGI:108110]
Tgfbr3	X	-	-	-	-	-	-	0	add.P	5.42e-11	1055395	4	DNA : F_Prevotellaceae | DNA : G_Paraprevotella | DNA : ASV29 | DNA : ASV7	4	DNA: F_Prevotellaceae | G_Paraprevotella | ASV7 | ASV29	5	107106570	107289629	ENSMUSG00000029287	transforming growth factor, beta receptor III [Source:MGI Symbol;Acc:MGI:104637]
Tbx3	-	-	X	-	-	-	-	7	dom.P	9.67e-10	3826801	1	DNA : ASV19	0	NA	5	119670669	119684724	ENSMUSG00000018604	T-box 3 [Source:MGI Symbol;Acc:MGI:98495]
Tbx5	X	-	X	-	-	-	-	7	dom.P	3.88e-10	3208162	1	DNA : ASV19	2	DNA: ASV19 | ASV109	5	119832668	119885219	ENSMUSG00000018263	T-box 5 [Source:MGI Symbol;Acc:MGI:102541]
Aacs	X	X	X	-	-	-	-	2	dom.P	8.12e-16	3779751	8	DNA : C_Deferribacteres | DNA : F_Deferribacteraceae | DNA : G_Mucispirillum | DNA : O_Deferribacterales | DNA : ASV10 | DNA : ASV13 | DNA : ASV6 | DNA : P_Deferribacteres	3	DNA: ASV6 | ASV13 | ASV10	5	125475814	125517410	ENSMUSG00000029482	acetoacetyl-CoA synthetase [Source:MGI Symbol;Acc:MGI:1926144]
Slc7a1	X	-	X	-	-	-	-	3	add.P	6.5e-11	17399	3	DNA : G_Marvinbryantia | DNA : ASV109 | RNA : ASV115	2	DNA: G_Marvinbryantia | RNA: ASV115	5	148327410	148399904	ENSMUSG00000041313	solute carrier family 7 (cationic ami- acid transporter, y+ system), member 1 [Source:MGI Symbol;Acc:MGI:88117]
Grm8	X	-	-	-	X	-	-	0	add.P	4.16e-14	4428175	1	DNA : ASV113 | DNA : ASV113 | DNA : ASV113	1	DNA: ASV113 | DNA: ASV113	6	27275119	28135178	ENSMUSG00000024211	glutamate receptor, metabotropic 8 [Source:MGI Symbol;Acc:MGI:1351345]
Gng12	X	-	-	X	-	-	-	0	dom.P	1.02e-14	24681	4	DNA : G_Roseburia | RNA : ASV151 | RNA : ASV40 | RNA : ASV63	4	DNA: G_Roseburia | RNA: ASV151 | ASV63 | ASV40	6	66896397	67021350	ENSMUSG00000036402	guanine nucleotide binding protein (G protein), gamma 12 [Source:MGI Symbol;Acc:MGI:1336171]
Tpra1	X	-	X	-	-	-	-	1	add.P	1.11e-12	53593	3	DNA : ASV119 | DNA : ASV64 | DNA : ASV98	3	DNA: ASV98 | ASV64 | ASV119	6	88902251	88912238	ENSMUSG00000002871	transmembrane protein, adipocyte asscociated 1 [Source:MGI Symbol;Acc:MGI:1345190]
Prok2	X	-	-	X	-	-	-	0	add.P	2.39e-23	418889	8	DNA : ASV35 | RNA : C_Bacilli | RNA : F_Lactobacillaceae | RNA : G_Lactobacillus | RNA : O_Lactobacillales | RNA : ASV181 | RNA : ASV20 | RNA : ASV31 | RNA : ASV35	7	RNA: ASV20 | ASV31 | O_Lactobacillales | C_Bacilli | F_Lactobacillaceae | G_Lactobacillus | ASV181	6	99711299	99726392	ENSMUSG00000030069	prokineticin 2 [Source:MGI Symbol;Acc:MGI:1354178]
Itpr1	X	-	-	-	X	-	-	0	add.P	2.39e-23	11009106	2	DNA : ASV35 | RNA : ASV135 | RNA : ASV35	1	DNA: ASV35 | RNA: ASV35	6	108213096	108551109	ENSMUSG00000030102	i-sitol 1,4,5-trisphosphate receptor 1 [Source:MGI Symbol;Acc:MGI:96623]
Grm7	X	-	-	-	X	-	-	0	add.P	1.4e-12	27880596	1	RNA : ASV135	1	RNA: ASV50	6	110645581	111567230	ENSMUSG00000056755	glutamate receptor, metabotropic 7 [Source:MGI Symbol;Acc:MGI:1351344]
Oxtr	X	-	-	X	-	-	-	0	add.P	4.4e-16	27880596	1	RNA : ASV135	1	RNA: ASV135	6	112473683	112489943	ENSMUSG00000049112	oxytocin receptor [Source:MGI Symbol;Acc:MGI:109147]
Cxcl12	X	-	-	-	X	-	-	0	add.P	1.18e-09	27880596	1	RNA : ASV135	1	RNA: ASV135	6	117168535	117181367	ENSMUSG00000061353	chemokine (C-X-C motif) ligand 12 [Source:MGI Symbol;Acc:MGI:103556]
Mfge8	X	-	X	-	X	-	-	2	add.P	4.27e-11	6666626	2	RNA : G_Eisenbergiella | RNA : ASV35 | RNA : ASV35 | RNA : ASV35	1	RNA: ASV35	7	79133768	79149060	ENSMUSG00000030605	milk fat globule-EGF factor 8 protein [Source:MGI Symbol;Acc:MGI:102768]
Fzd4	X	-	-	-	X	-	-	0	add.P	4.27e-11	13235297	4	DNA : unclassified_F_Ruminococcaceae | RNA : G_Eisenbergiella | RNA : ASV281 | RNA : ASV77	1	RNA: G_Eisenbergiella	7	89404355	89413134	ENSMUSG00000049791	frizzled class receptor 4 [Source:MGI Symbol;Acc:MGI:108520]
Wnt11	X	-	-	-	X	-	-	0	add.P	4.27e-11	6668138	5	DNA : ASV21 | RNA : G_Eisenbergiella | RNA : ASV281 | RNA : ASV40 | RNA : ASV77	3	DNA: ASV21 | RNA: ASV40 | RNA: G_Eisenbergiella	7	98835112	98855195	ENSMUSG00000015957	wingless-type MMTV integration site family, member 11 [Source:MGI Symbol;Acc:MGI:101948]
Pth	X	-	-	-	X	-	-	0	add.P	4.27e-11	56478114	1	RNA : G_Eisenbergiella	1	RNA: G_Eisenbergiella	7	113385580	113388570	ENSMUSG00000059077	parathyroid hormone [Source:MGI Symbol;Acc:MGI:97799]
Nrg1	X	-	-	-	-	-	-	0	add.P	3.88e-15	18905	3	DNA : ASV32| DNA : ASV47 | RNA : ASV49	3	DNA: ASV32 | ASV47 | RNA: ASV49	8	31814551	32884797	ENSMUSG00000062991	neuregulin 1 [Source:MGI Symbol;Acc:MGI:96083]
Adcy7	X	-	-	-	X	-	-	0	dom.P	3.6e-33	227861	3	DNA : ASV17 | RNA : unclassified_C_Deltaproteobacteria | RNA : ASV234	1	RNA: unclassified_C_Deltaproteobacteria	8	88272403	88329962	ENSMUSG00000031659	adenylate cyclase 7 [Source:MGI Symbol;Acc:MGI:102891]
Ces1f	-	X	X	-	-	-	-	1	dom.P	3.6e-33	9144999	2	DNA : ASV17 | RNA : ASV234	0	NA	8	93256236	93279747	ENSMUSG00000031725	carboxylesterase 1F [Source:MGI Symbol;Acc:MGI:2142687]
Chordc1	X	X	-	-	-	-	-	0	dom.P	1.04e-11	663124	2	RNA : ASV26 | RNA : ASV281 | RNA : ASV281	1	RNA: ASV26	9	18292125	18317442	ENSMUSG00000001774	cysteine and histidine-rich domain (CHORD)-containing, zinc-binding protein 1 [Source:MGI Symbol;Acc:MGI:1914167]
Gclc	-	X	X	-	-	-	X	2	add.P	3.27e-09	6904818	2	DNA : unclassified_P_Bacteroidetes | RNA : ASV97	0	NA	9	77754535	77794485	ENSMUSG00000032350	glutamate-cysteine ligase, catalytic subunit [Source:MGI Symbol;Acc:MGI:104990]
Clasp2	X	-	X	-	-	-	-	6	add.P	1.21e-14	1240848	3	RNA : ASV22 | RNA : ASV36 | RNA : ASV88	1	RNA: ASV88	9	113741473	113919682	ENSMUSG00000033392	CLIP associating protein 2 [Source:MGI Symbol;Acc:MGI:1923749]
Fbxl2	-	-	X	-	-	-	-	6	add.P	1.59e-12	5309120	2	RNA : ASV22 | RNA : ASV36	0	NA	9	113963637	114046191	ENSMUSG00000032507	F-box and leucine-rich repeat protein 2 [Source:MGI Symbol;Acc:MGI:1919429]
Xcr1	X	-	-	X	-	-	-	0	add.P	8.53e-11	0	3	DNA : ASV32 | DNA : ASV47| RNA : ASV102	3	DNA: ASV47 | ASV32 | RNA: ASV102	9	123852315	123862029	ENSMUSG00000060509	chemokine (C motif) receptor 1 [Source:MGI Symbol;Acc:MGI:1346338]
Iyd	X	X	-	-	-	-	-	0	add.P	1.53e-17	13013375	2	RNA G_Odoribacter | RNA ASV52	2	RNA: ASV52 | G_Odoribacter	10	3540240	3554877	ENSMUSG00000019762	iodotyrosine deiodinase [Source:MGI Symbol;Acc:MGI:1917587]
Nmur2	X	-	X	X	-	-	-	2	add.P	5.67e-21	8792908	1	RNA : ASV130	5	DNA: G_Dorea | DNA: G_Butyricicoccus| RNA: G_Dorea | ASV184 | ASV293 |ASV12	11	56024987	56041010	ENSMUSG00000037393	neuromedin U receptor 2 [Source:MGI Symbol;Acc:MGI:2441765]
Gria1	X	-	-	-	-	-	-	0	add.P	5.67e-21	4077410	4	DNA : G_Dorea | RNA : G_Dorea | RNA : ASV130 | RNA : ASV184 | RNA : ASV293	4	DNA: G_Dorea | DNA: G_Butyricicoccus | RNA: ASV293 | ASV184 | G_Dorea	11	57011387	57330244	ENSMUSG00000020524	glutamate receptor, io-tropic, AMPA1 (alpha 1) [Source:MGI Symbol;Acc:MGI:95808]
Alox15	-	X	-	-	-	-	X	0	add.P	3.4e-10	5457231	2	DNA : F_Prevotellaceae | RNA : ASV115	0	NA	11	70344152	70352031	ENSMUSG00000018924	arachidonate 15-lipoxygenase [Source:MGI Symbol;Acc:MGI:87997]
Actr10	-	X	X	-	-	-	X	1	add.P	4.45e-10	5639950	2	RNA : G_Marvinbryantia | RNA : ASV229	0	NA	12	70937857	70964718	ENSMUSG00000021076	ARP10 actin-related protein 10 [Source:MGI Symbol;Acc:MGI:1891654]
Serpina3b	X	-	-	-	X	-	-	0	add.P	1.43e-13	50809	3	RNA : G_Marvinbryantia | RNA : ASV158 | RNA : ASV158 | RNA : ASV158 | RNA : ASV370	2	RNA: ASV158 | ASV370	12	104127996	104139545	ENSMUSG00000066364	serine (or cysteine) peptidase inhibitor, clade A, member 3B [Source:MGI Symbol;Acc:MGI:2182835]
Dync1h1	X	-	-	-	X	-	-	0	dom.P	1.32e-18	6298095	1	RNA : ASV36	1	RNA: ASV36	12	110601452	110666945	ENSMUSG00000018707	dynein cytoplasmic 1 heavy chain 1 [Source:MGI Symbol;Acc:MGI:103147]
Chrm3	X	-	-	X	-	-	-	0	add.P	1.01e-19	1541811	3	RNA ASV293 | RNA G_Fusicatenibacter | RNA G_Fusicatenibacter | RNA G_Fusicatenibacter | RNA ASV133 | RNA ASV133 | RNA ASV133	3	RNA: ASV293 | RNA: G_Fusicatenibacter | ASV133	13	9875486	10360847	ENSMUSG00000046159	cholinergic receptor, muscarinic 3, cardiac [Source:MGI Symbol;Acc:MGI:88398]
Adcy2	X	-	X	-	X	-	-	3	add.P	9.88e-21	1313430	1	RNA : ASV36	1	RNA: ASV36	13	68620043	68999541	ENSMUSG00000021536	adenylate cyclase 2 [Source:MGI Symbol;Acc:MGI:99676]
Pik3r1	X	-	-	-	X	-	-	0	add.P	6e-14	5418384	2	RNA : ASV101 | RNA : ASV101 | RNA : ASV101 | RNA : ASV85 | RNA : ASV85 | RNA : ASV85	1	RNA: ASV101	13	101680563	101768217	ENSMUSG00000041417	phosphoi-sitide-3-kinase regulatory subunit 1 [Source:MGI Symbol;Acc:MGI:97583]
Glud1	-	X	-	-	-	-	-	0	add.P	2.36e-09	39215731	1	RNA : ASV63	0	NA	14	34310727	34345265	ENSMUSG00000021794	glutamate dehydrogenase 1 [Source:MGI Symbol;Acc:MGI:95753]
Ephx2	-	X	-	-	-	-	X	0	add.P	7.07e-14	17533896	2	RNA : ASV63 | RNA : ASV97	0	NA	14	66084374	66124500	ENSMUSG00000022040	epoxide hydrolase 2, cytoplasmic [Source:MGI Symbol;Acc:MGI:99500]
Oxgr1	X	-	-	-	X	-	-	0	add.P	3.1e-16	111733	3	RNA ASV22 | RNA ASV36 | RNA ASV97	3	RNA: ASV22 | ASV97 | ASV36	14	120019585	120042435	ENSMUSG00000044819	oxoglutarate (alpha-ketoglutarate) receptor 1 [Source:MGI Symbol;Acc:MGI:2685145]
Mchr1	X	-	-	X	-	-	-	0	add.P	1.7e-18	1098871	5	RNA : ASV155 | RNA : ASV170 | RNA : ASV180 | RNA : ASV36 | RNA : ASV97	2	RNA: ASV36 | ASV97	15	81235499	81238964	ENSMUSG00000050164	melanin-concentrating hormone receptor 1 [Source:MGI Symbol;Acc:MGI:2180756]
Cyp2d26	-	X	-	-	-	-	X	0	add.P	6.14e-11	20709499	3	RNA : ASV155 | RNA : ASV170 | RNA : ASV180	0	NA	15	82790101	82794294	ENSMUSG00000022445	cytochrome P450, family 2, subfamily d, polypeptide 26 [Source:MGI Symbol;Acc:MGI:1923529]
Htr1f	X	-	-	-	X	-	-	0	add.P	5.57e-19	27533448	1	RNA : ASV135	3	DNA: G_Anaerostipes | ASV79 | RNA: ASV79 | G_Anaerostipes | ASV139	16	64924729	65105854	ENSMUSG00000050783	5-hydroxytryptamine (serotonin) receptor 1F [Source:MGI Symbol;Acc:MGI:99842]
C4b	X	-	-	-	X	-	-	0	dom.P	1.03e-15	10123822	2	DNA : ASV145 | RNA : ASV145 | RNA : ASV50	2	DNA: ASV145 | DNA: ASV145 | RNA: ASV145 | DNA: ASV145 | RNA: ASV145 | DNA: ASV5	17	34728380	34743882	ENSMUSG00000073418	complement component 4B (Chido blood group) [Source:MGI Symbol;Acc:MGI:88228]
Cfb	X	-	-	-	X	-	-	0	dom.P	1.03e-15	10123822	2	DNA : ASV145 | DNA : ASV145 | DNA : ASV145 | RNA : ASV145 | RNA : ASV145 | RNA : ASV145 | RNA : ASV50 | RNA : ASV50 | RNA : ASV50	1	DNA: ASV145 | RNA: ASV145	17	34856374	34862518	ENSMUSG00000090231	complement factor B [Source:MGI Symbol;Acc:MGI:105975]
Mep1a	-	X	X	-	-	-	-	2	add.P	1.8e-12	5190732	3	DNA : G_Butyricicoccus | DNA : ASV145 | RNA : ASV264	0	NA	17	43474324	43502812	ENSMUSG00000023914	meprin 1 alpha [Source:MGI Symbol;Acc:MGI:96963]
C3	X	-	X	X	-	-	-	2	add.P	1.8e-12	231	2	DNA : ASV145 | RNA : unclassified_C_Deltaproteobacteria | RNA : ASV145	1	RNA: unclassified_C_Deltaproteobacteria	17	57203970	57228136	ENSMUSG00000024164	complement component 3 [Source:MGI Symbol;Acc:MGI:88227]
Slc3a1	X	X	X	-	-	-	-	NA	add.P	5.37e-14	1405853	3	DNA : F_Prevotellaceae | DNA : G_Paraprevotella | DNA : ASV7 | RNA : F_Prevotellaceae | RNA : G_Paraprevotella	2	DNA: ASV7 | G_Paraprevotella	17	85028376	85064236	ENSMUSG00000024131	solute carrier family 3, member 1 [Source:MGI Symbol;Acc:MGI:1195264]
Adcyap1	X	-	-	-	X	-	-	0	add.P	4.27e-11	22037	1	RNA ASV97	1	RNA: ASV97	17	93199017	93206537	ENSMUSG00000024256	adenylate cyclase activating polypeptide 1 [Source:MGI Symbol;Acc:MGI:105094]
Ppp2r2b	X	-	-	-	-	-	-	0	add.P	2.07e-41	959184	6	DNA : C_Bacilli | DNA : F_Staphylococcaceae | DNA : G_Staphylococcus | DNA : O_Bacillales | DNA : ASV156 | DNA : ASV9	6	DNA: C_Bacilli | ASV9 | O_Bacillales | F_Staphylococcaceae | G_Staphylococcus | ASV156 | DNA: ASV156 | C_Bacilli | G_Staphylococcus | ASV9 | O_Bacillales | F_Staphylococcaceae	18	42637432	43083127	ENSMUSG00000024500	protein phosphatase 2, regulatory subunit B, beta [Source:MGI Symbol;Acc:MGI:1920180]
Galr1	X	-	-	-	X	-	-	0	add.P	2.59e-13	19066636	1	DNA : ASV17	1	DNA: ASV17	18	82392380	82406777	ENSMUSG00000024553	galanin receptor 1 [Source:MGI Symbol;Acc:MGI:1096364]
Cyp2c55	-	X	-	-	-	X	-	0	add.P	6.68e-10	8701865	3	DNA : ASV5 | RNA : ASV126 | RNA : ASV238	0	NA	19	39007019	39042693	ENSMUSG00000025002	cytochrome P450, family 2, subfamily c, polypeptide 55 [Source:MGI Symbol;Acc:MGI:1919332]

## Sheet: All_candidate genes
Gene	Closest to SNP	Diff. expressed in GF	In other studies	Hub genes network snps	First neighbours hubs snps network	Hub genes network diff. expression	First neighbours hub genes network diff. expression	Number of overlaps with other studies	P type	Min P	Min interval (Mb)	Number of taxa intervals	Taxa interval	Number of taxa marker	Taxa marker	Chr	Start_position	End_position	Ensembl_gene_id	Description		Degree	AverageShortestPathLength	BetweennessCentrality	ClosenessCentrality	ClusteringCoefficient	Eccentricity	IsSingleNode	NeighborhoodConnectivity	NumberOfDirectedEdges	NumberOfUndirectedEdges	PartnerOfMultiEdgedNodePairs	Radiality	Stress	TopologicalCoefficient	stringdb::description	tissue::intestine	display name
Igfbp5	X	-	X	-	X	-	-	1	add.P	1.33e-14	9177089	4	DNA : SV17 | DNA : SV17 | DNA : SV17 | RNA : SV151 | RNA : SV151 | RNA : SV151 | RNA : SV17 | RNA : SV17 | RNA : SV17 | RNA : SV40 | RNA : SV40 | RNA : SV40 | RNA : SV63	1	DNA: SV17 | RNA: SV17	1	72857932	72874884	ENSMUSG00000026185	insulin-like growth factor binding protein 5 [Source:MGI Symbol;Acc:MGI:96440]		10	3.76724	0.0158217	0.265446	0.622222	8	FALSE	11.1	0	10	0	0.907759	3818	0.247727	Insulin-like growth factor binding protein 5; IGF-binding proteins prolong the half-life of the IGFs and have been shown to either inhibit or stimulate the growth promoting effects of the IGFs on cell culture. They alter the interaction of IGFs with their cell surface receptors.	2.81418	Igfbp5
Dock10	X	-	-	-	-	-	-	0	add.P	1.33e-14	3121686	7	DNA : G_Roseburia | DNA : SV17 | DNA : SV17 | RNA : G_Odoribacter | RNA : SV139 | RNA : SV151 | RNA : SV151 | RNA : SV151 | RNA : SV17 | RNA : SV17 | RNA : SV40 | RNA : SV40 | RNA : SV40 | RNA : SV63 | RNA : SV63 | RNA : SV63	4	DNA: G_Roseburia | RNA: SV151 | SV40 | SV63	1	80501073	80758527	ENSMUSG00000038608	dedicator of cytokinesis 10 [Source:MGI Symbol;Acc:MGI:2146320]		1	1	0	1	0	1	FALSE	1	0	1	0	1	0	0	Dedicator of cytokinesis protein 10; Guanine nucleotide-exchange factor (GEF) that activates CDC42 and RAC1 by exchanging bound GDP for free GTP. Essential for dendritic spine morphogenesis in Purkinje cells and in hippocampal neurons; via a CDC42-mediated pathway. Sustains B-cell lymphopoiesis in secondary lymphoid tissues and regulates FCER2/CD23 expression.	1.21109	Dock10
Agfg1	X	-	-	-	-	-	-	0	add.P	3.03e-13	22303105	1	DNA : SV17	1	DNA: SV19	1	82839483	82901182	ENSMUSG00000026159	ArfGAP with FG repeats 1 [Source:MGI Symbol;Acc:MGI:1333754]		2	4.68534	0.000801906	0.213431	0	9	FALSE	3.5	0	2	0	0.877155	150	0.5	Arf-GAP domain and FG repeat-containing protein 1; Required for vesicle docking or fusion during acrosome biogenesis. May play a role in RNA trafficking or localization.	2.87216	Agfg1
Slc19a3	X	-	-	-	-	-	-	0	add.P	3.03e-13	22303105	1	DNA : SV17	1	DNA: SV19	1	83012523	83038448	ENSMUSG00000038496	solute carrier family 19, member 3 [Source:MGI Symbol;Acc:MGI:1931307]		1	4.72845	0	0.211486	0	8	FALSE	15	0	1	0	0.875718	0	0	Solute carrier family 19; member 3; Mediates high affinity thiamine uptake; probably via a proton anti-port mechanism. Has no folate transport activity (By similarity).	2.39399	Slc19a3
Alpi	-	X	-	-	-	-	X	0	add.P	4.2e-17	3848574	4	DNA : SV17 | RNA : G_Marvinbryantia | RNA : G_Marvinbryantia | RNA : SV26 | RNA : SV370 | RNA : SV370 | RNA : SV370	0	NA	1	87098002	87101606	ENSMUSG00000079440	alkaline phosphatase, intestinal [Source:MGI Symbol;Acc:MGI:1924018]		0	0	0	0	0	0	TRUE	0	0	0	0	Infinity	0	0	Heart alpha-protein kinase; Kinases that recognize phosphorylation sites in which the surrounding peptides have an alpha-helical conformation.		Alpk2
Spp2	X	-	-	-	X	-	-	0	add.P	4.2e-17	3848574	4	DNA : SV17 | RNA : G_Marvinbryantia | RNA : G_Marvinbryantia | RNA : SV26 | RNA : SV370 | RNA : SV370 | RNA : SV370	1	RNA: SV26	1	88406961	88426438	ENSMUSG00000026295	secreted phosphoprotein 2 [Source:MGI Symbol;Acc:MGI:1922646]		10	3.93103	0.0116916	0.254386	0.688889	8	FALSE	10.4	0	10	0	0.902299	5170	0.26	Secreted phosphoprotein 24; Could coordinate an aspect of bone turnover.	0.894824	Spp2
Mrps14	-	-	X	-	-	-	-	6	add.P	1.63e-15	5226100	3	DNA : G_Marvinbryantia | DNA : G_Marvinbryantia | DNA : SV5 | RNA : SV158 | RNA : SV158 | RNA : SV158	0	NA	1	160195215	160202170	ENSMUSG00000058267	mitochondrial ribosomal protein S14 [Source:MGI Symbol;Acc:MGI:1928141]		12	4.50862	0.0208493	0.221797	0.393939	9	FALSE	6.33333	0	12	0	0.883046	6448	0.284091	Mitochondrial ribosomal protein S14; Belongs to the universal ribosomal protein uS14 family.	1.62483	Mrps14
Cacybp	-	-	X	-	-	-	-	6	add.P	1.63e-15	5226100	3	DNA : G_Marvinbryantia | DNA : G_Marvinbryantia | DNA : SV5 | RNA : SV158 | RNA : SV158 | RNA : SV158	0	NA	1	160202367	160212875	ENSMUSG00000014226	calcyclin binding protein [Source:MGI Symbol;Acc:MGI:1270839]		3	4.80603	0.00570738	0.208072	0	8	FALSE	3.66667	0	3	0	0.873132	1928	0.333333	Calcyclin binding protein; May be involved in calcium-dependent ubiquitination and subsequent proteasomal degradation of target proteins. Probably serves as a molecular bridge in ubiquitin E3 complexes. Participates in the ubiquitin-mediated degradation of beta-catenin (CTNNB1) (By similarity).	2.55524	Cacybp
Rabgap1l	-	-	X	-	-	-	-	6	add.P	1.63e-15	5226100	3	DNA : G_Marvinbryantia | DNA : G_Marvinbryantia | DNA : SV5 | RNA : SV158 | RNA : SV158 | RNA : SV158	0	NA	1	160219174	160793211	ENSMUSG00000026721	RAB GTPase activating protein 1-like [Source:MGI Symbol;Acc:MGI:1352507]		0	0	0	0	0	0	TRUE	0	0	0	0	Infinity	0	0	RAB GTPase activating protein 1-like; GTP-hydrolysis activating protein (GAP) for small GTPase RAB22A; converting active RAB22A-GTP to the inactive form RAB22A- GDP (By similarity). Plays a role in endocytosis and intracellular protein transport. Recruited by ANK2 to phosphatidylinositol 3- phosphate (PI3P)-positive early endosomes; where it inactivates RAB22A; and promotes polarized trafficking …	1.91179	Rabgap1l
Gpr52	-	-	-	-	-	-	-	0	add.P	1.63e-15	5226100	3	DNA : G_Marvinbryantia | DNA : G_Marvinbryantia | DNA : SV5 | RNA : SV158 | RNA : SV158 | RNA : SV158	0	NA	1	160576338	160577974	ENSMUSG00000118401	G protein-coupled receptor 52 [Source:MGI Symbol;Acc:MGI:3643278]
Rc3h1	-	-	X	-	-	-	-	6	add.P	1.63e-15	5226100	3	DNA : G_Marvinbryantia | DNA : G_Marvinbryantia | DNA : SV5 | RNA : SV158 | RNA : SV158 | RNA : SV158	0	NA	1	160906418	160974978	ENSMUSG00000040423	RING CCCH (C3H) domains 1 [Source:MGI Symbol;Acc:MGI:2685397]		0	0	0	0	0	0	TRUE	0	0	0	0	Infinity	0	0	RING finger and CCCH-type zinc finger domain-containing protein 1; Post-transcriptional repressor of mRNAs containing a conserved stem loop motif; called constitutive decay element (CDE); which is often located in the 3'-UTR; as in HMGXB3; ICOS; IER3; NFKBID; NFKBIZ; PPP1R10; TNF and in many more mRNAs. Cleaves translationally inactive mRNAs harboring a stem-loop (SL); often located in their 3'-U…	2.4617	Rc3h1
Serpinc1	-	-	X	-	-	-	-	6	add.P	1.63e-15	5226100	3	DNA : G_Marvinbryantia | DNA : G_Marvinbryantia | DNA : SV5 | RNA : SV158 | RNA : SV158 | RNA : SV158	0	NA	1	160978585	161005863	ENSMUSG00000026715	serine (or cysteine) peptidase inhibitor, clade C (antithrombin), member 1 [Source:MGI Symbol;Acc:MGI:88095]		13	3.88362	0.027589	0.257492	0.435897	8	FALSE	8.84615	0	13	0	0.903879	8430	0.201049	Serine (or cysteine) peptidase inhibitor; clade C (antithrombin); member 1; Most important serine protease inhibitor in plasma that regulates the blood coagulation cascade. AT-III inhibits thrombin; matriptase-3/TMPRSS7; as well as factors IXa; Xa and XIa. Its inhibitory activity is greatly enhanced in the presence of heparin (By similarity).	2.6973	Serpinc1
Zbtb37	-	-	X	-	-	-	-	6	add.P	1.63e-15	5226100	3	DNA : G_Marvinbryantia | DNA : G_Marvinbryantia | DNA : SV5 | RNA : SV158 | RNA : SV158 | RNA : SV158	0	NA	1	161002922	161034849	ENSMUSG00000043467	zinc finger and BTB domain containing 37 [Source:MGI Symbol;Acc:MGI:2444467]		3	4.57759	0.00862069	0.218456	0.333333	9	FALSE	6.33333	0	3	0	0.880747	1584	0.375	Zinc finger and BTB domain containing 37		Zbtb37
Dars2	-	-	X	-	-	-	-	6	add.P	1.63e-15	5226100	3	DNA : G_Marvinbryantia | DNA : G_Marvinbryantia | DNA : SV5 | RNA : SV158 | RNA : SV158 | RNA : SV158	0	NA	1	161040601	161070658	ENSMUSG00000026709	aspartyl-tRNA synthetase 2 (mitochondrial) [Source:MGI Symbol;Acc:MGI:2442510]		1	5.57328	0	0.179428	0	10	FALSE	3	0	1	0	0.847557	0	0	aspartyl-tRNA synthetase 2 (mitochondrial)	1.43852	Dars2
Cenpl	-	-	X	-	-	-	-	6	add.P	1.63e-15	5226100	3	DNA : G_Marvinbryantia | DNA : G_Marvinbryantia | DNA : SV5 | RNA : SV158 | RNA : SV158 | RNA : SV158	0	NA	1	161070713	161086724	ENSMUSG00000026708	centromere protein L [Source:MGI Symbol;Acc:MGI:1917704]		5	3.98707	0.0105428	0.250811	0.4	8	FALSE	8	0	5	0	0.900431	2212	0.275862	Centromere protein L; Component of the CENPA-CAD (nucleosome distal) complex; a complex recruited to centromeres which is involved in assembly of kinetochore proteins; mitotic progression and chromosome segregation. May be involved in incorporation of newly synthesized CENPA into centromeres via its interaction with the CENPA-NAC complex (By similarity).	1.33612	Cenpl
Klhl20	-	-	X	-	-	-	-	6	add.P	1.63e-15	5226100	3	DNA : G_Marvinbryantia | DNA : G_Marvinbryantia | DNA : SV5 | RNA : SV158 | RNA : SV158 | RNA : SV158	0	NA	1	161088375	161131511	ENSMUSG00000026705	kelch-like 20 [Source:MGI Symbol;Acc:MGI:2444855]		3	4.32759	0.000378595	0.231076	0.666667	8	FALSE	8.66667	0	3	0	0.88908	130	0.412698	Kelch-like ECT2-interacting protein; Substrate-specific adapter of a BCR (BTB-CUL3-RBX1) E3 ubiquitin-protein ligase complex involved in interferon response and anterograde Golgi to endosome transport. The BCR(KLHL20) E3 ubiquitin ligase complex mediates the ubiquitination of DAPK1; leading to its degradation by the proteasome; thereby acting as a negative regulator of apoptosis. The BCR(KLHL20) …	1.37174	Klhl20
Ankrd45	-	-	X	-	-	-	-	6	add.P	1.63e-15	5226100	3	DNA : G_Marvinbryantia | DNA : G_Marvinbryantia | DNA : SV5 | RNA : SV158 | RNA : SV158 | RNA : SV158	0	NA	1	161142691	161170498	ENSMUSG00000044835	ankyrin repeat domain 45 [Source:MGI Symbol;Acc:MGI:1921094]		6	3.59483	0.0204453	0.278177	0.266667	7	FALSE	7.83333	0	6	0	0.913506	4782	0.220588	Apoptosis-inducing TAF9-like domain-containing protein 1 homolog; DNA-binding component of the Fanconi anemia (FA) core complex. Required for the normal activation of the FA pathway; leading to monoubiquitination of the FANCI-FANCD2 complex in response to DNA damage; cellular resistance to DNA cross-linking drugs; and prevention of chromosomal breakage. In complex with CENPX (MHF heterodimer); cr…	1.81856	Apitd1
Tex50	-	-	X	-	-	-	-	6	add.P	1.63e-15	5226100	3	DNA : G_Marvinbryantia | DNA : G_Marvinbryantia | DNA : SV5 | RNA : SV158 | RNA : SV158 | RNA : SV158	0	NA	1	161154558	161159314	ENSMUSG00000049160	testis expressed 50 [Source:MGI Symbol;Acc:MGI:1922183]
Pbx1	X	-	X	-	-	-	-	2	add.P	1.63e-15	75766	4	RNA : SV115 | RNA : SV158 | RNA : SV158 | RNA : SV234 | RNA : SV234 | RNA : SV234 | RNA : SV370 | RNA : SV370	1	RNA: SV370	1	168119364	168432270	ENSMUSG00000052534	pre B cell leukemia homeobox 1 [Source:MGI Symbol;Acc:MGI:97495]		1	5.19828	0	0.192371	0	8	FALSE	5	0	1	0	0.860057	0	0	Pre-B-cell leukemia transcription factor 1; Plays a role in the cAMP-dependent regulation of CYP17 gene expression via its cAMP-regulatory sequence (CRS1) 5'- ATCAATCAA-3'. Acts as a transcriptional activator of PF4 in complex with MEIS1. May have a role in steroidogenesis and; subsequently; sexual development and differentiation. Isoform PBX1b as part of a PDX1:PBX1b:MEIS2b complex in pancreatic…	2.65836	Pbx1
Tagln2	-	X	X	-	-	-	-	2	add.P	5.53e-11	9998741	2	RNA : SV115 | RNA : SV234 | RNA : SV234 | RNA : SV234	0	NA	1	172500047	172507380	ENSMUSG00000026547	transgelin 2 [Source:MGI Symbol;Acc:MGI:1312985]		1	5.15517	0	0.19398	0	9	FALSE	9	0	1	0	0.861494	0	0	Transgelin 2; Belongs to the calponin family.	3.15145	Tagln2
Mia3	-	X	-	-	-	-	X	0	add.P	1.76e-20	12680037	2	DNA : SV50 | DNA : SV50 | DNA : SV50 | RNA : SV49 | RNA : SV49	0	NA	1	183326725	183369553	ENSMUSG00000056050	mela-ma inhibitory activity 3 [Source:MGI Symbol;Acc:MGI:2443183]								TRUE
Itih2	X	-	-	-	X	-	-	0	add.P	6.34e-13	10396430	2	DNA : SV113 | DNA : SV113 | RNA : SV60 | RNA : SV60 | RNA : SV60	2	DNA: SV113 | RNA: SV60	2	10094593	10131396	ENSMUSG00000037254	inter-alpha trypsin inhibitor, heavy chain 2 [Source:MGI Symbol;Acc:MGI:96619]		11	3.96552	0.0201049	0.252174	0.545455	8	FALSE	9.09091	0	11	0	0.901149	4214	0.254545	Inter-alpha trypsin inhibitor; heavy chain 2; May act as a carrier of hyaluronan in serum or as a binding protein between hyaluronan and other matrix protein; including those on cell surfaces in tissues to regulate the localization; synthesis and degradation of hyaluronan which are essential to cells undergoing biological processes; Belongs to the ITIH family.	1.14605	Itih2
Prkcq	X	X	-	-	-	-	-	0	add.P	6.34e-13	10396430	2	DNA : SV113 | DNA : SV113 | RNA : SV60 | RNA : SV60 | RNA : SV60	4	DNA: SV68 | G_Dorea | RNA: SV29 | unclassified_C_Deltaproteobacteria	2	11172108	11301222	ENSMUSG00000026778	protein kinase C, theta [Source:MGI Symbol;Acc:MGI:97601]		1	4.96121	0	0.201564	0	9	FALSE	11	0	1	0	0.86796	0	0	Protein kinase C theta type; Calcium-independent; phospholipid- and diacylglycerol (DAG)-dependent serine/threonine-protein kinase that mediates non- redundant functions in T-cell receptor (TCR) signaling; including T-cells activation; proliferation; differentiation and survival; by mediating activation of multiple transcription factors such as NF-kappa-B; JUN; NFATC1 and NFATC2. In TCR-CD3/CD28-…	2.3238	Prkcq
Nebl	X	X	X	-	-	-	-	1	add.P	6.34e-13	2978866	4	DNA : SV113 | DNA : SV113 | DNA : SV50 | RNA : SV49 | RNA : SV60 | RNA : SV60 | RNA : SV60	2	DNA: SV50 | RNA: SV49	2	17343909	17731464	ENSMUSG00000053702	nebulette [Source:MGI Symbol;Acc:MGI:1921353]		0	0	0	0	0	0	TRUE	0	0	0	0	Infinity	0	0	Actin-binding Z-disk protein; Binds to actin and plays an important role in the assembly of the Z-disk. May functionally link sarcomeric actin to the desmin intermediate filaments in the heart muscle sarcomeres. Isoform 2 might play a role in the assembly of focal adhesion (By similarity).	0.625212	Nebl
Kcnj3	X	-	-	-	X	-	-	0	add.P	1.07e-20	24831454	1	DNA : SV35 | DNA : SV35 | RNA : SV35 | RNA : SV35	1	DNA: SV35 | RNA: SV35	2	55435970	55598145	ENSMUSG00000026824	potassium inwardly-rectifying channel, subfamily J, member 3 [Source:MGI Symbol;Acc:MGI:104742]		2	4.34483	0	0.230159	1	8	FALSE	20.5	0	2	0	0.888506	0	0.683333	Potassium inwardly-rectifying channel; subfamily J; member 3; This potassium channel is controlled by G proteins. Inward rectifier potassium channels are characterized by a greater tendency to allow potassium to flow into the cell rather than out of it. Their voltage dependence is regulated by the concentration of extracellular potassium; as external potassium is raised; the voltage range of the …	1.24512	Kcnj3
Mtx2	X	-	-	-	-	-	-	0	add.P	1.26e-12	27787215	1	RNA : SV35 | RNA : SV35	1	DNA: unclassified_P_Bacteroidetes	2	74825803	74878431	ENSMUSG00000027099	metaxin 2 [Source:MGI Symbol;Acc:MGI:1859652]		0	0	0	0	0	0	TRUE	0	0	0	0	Infinity	0	0	Mitochondrial outer membrane import complex protein 2; Involved in transport of proteins into the mitochondrion.	2.25845	Mtx2
Hnrnpa3	X	-	-	-	-	-	-	0	add.P	1.26e-12	27787215	1	RNA : SV35 | RNA : SV35	1	DNA: unclassified_P_Bacteroidetes	2	75659261	75669407	ENSMUSG00000059005	heterogeneous nuclear ribonucleoprotein A3 [Source:MGI Symbol;Acc:MGI:1917171]		5	4.39655	0	0.227451	1	8	FALSE	7.8	0	5	0	0.886782	0	0.410526	Heterogeneous nuclear ribonucleoprotein A3; Plays a role in cytoplasmic trafficking of RNA. Binds to the cis-acting response element; A2RE. May be involved in pre-mRNA splicing (By similarity).	2.4846	Hnrnpa3
Emc7	-	X	X	-	-	-	-	1	add.P	1.34e-10	5043804	1	DNA : unclassified_F_Porphyromonadaceae	0	NA	2	112454997	112472162	ENSMUSG00000055943	ER membrane protein complex subunit 7 [Source:MGI Symbol;Acc:MGI:1920274]		2	6.53879	0	0.152933	1	10	FALSE	2.5	0	2	0	0.815374	0	0.833333	ER membrane protein complex subunit 7; Belongs to the EMC7 family.	1.70235	Emc7
Fbn1	X	-	-	-	X	-	-	0	add.P	1.61e-10	100098	2	RNA : unclassified_P_Bacteroidetes | RNA : SV45 | RNA : SV45	1	RNA: SV45	2	125300594	125507993	ENSMUSG00000027204	fibrillin 1 [Source:MGI Symbol;Acc:MGI:95489]		10	3.70259	0.0250512	0.270081	0.622222	8	FALSE	11	0	10	0	0.909914	6212	0.245455	Fibrillin 1; Fibrillin-1: Structural component of the 10-12 nm diameter microfibrils of the extracellular matrix; which conveys both structural and regulatory properties to load-bearing connective tissues. Fibrillin-1-containing microfibrils provide long-term force bearing structural support. In tissues such as the lung; blood vessels and skin; microfibrils form the periphery of the elastic fiber…	2.47589	Fbn1
Plcb1	X	-	-	-	X	-	-	0	add.P	3.87e-11	7837006	2	RNA : unclassified_P_Bacteroidetes | RNA : SV142 | RNA : SV142 | RNA : SV142	1	RNA: SV142	2	134786067	135475258	ENSMUSG00000051177	phospholipase C, beta 1 [Source:MGI Symbol;Acc:MGI:97613]		16	3.78017	0.0164059	0.264538	0.441667	8	FALSE	11.125	0	16	0	0.907328	4206	0.252841	1-phosphatidylinositol 4;5-bisphosphate phosphodiesterase beta-1; The production of the second messenger molecules diacylglycerol (DAG) and inositol 1;4;5-trisphosphate (IP3) is mediated by activated phosphatidylinositol-specific phospholipase C enzymes.	1.88499	Plcb1
Kif16b	X	-	-	-	-	-	-	0	add.P	1.09e-17	200498	5	DNA : F_Rikenellaceae | DNA : G_Alistipes | DNA : G_Alistipes | DNA : G_Alistipes | DNA : unclassified_P_Bacteroidetes | DNA : SV142 | DNA : SV142 | DNA : SV142 | DNA : SV21 | DNA : SV21 | DNA : SV21 | RNA : unclassified_P_Bacteroidetes | RNA : SV142 | RNA : SV142 | RNA : SV142	4	DNA: SV21 | SV142 | G_Alistipes | DNA: SV142 | G_Alistipes | SV21 | F_Rikenellaceae	2	142617474	142901531	ENSMUSG00000038844	kinesin family member 16B [Source:MGI Symbol;Acc:MGI:1098240]		3	4.13793	0.00504788	0.241667	0.333333	8	FALSE	7.66667	0	3	0	0.895402	1150	0.385965	Kinesin-like protein KIF16B; Plus end-directed microtubule-dependent motor protein involved in endosome transport and receptor recycling and degradation. Regulates the plus end motility of early endosomes and the balance between recycling and degradation of receptors such as EGF receptor (EGFR) and FGF receptor (FGFR). Regulates the Golgi to endosome transport of FGFR-containing vesicles during e…	0.834703	Kif16b
Srsf6	-	X	X	-	-	-	-	4	add.P	1.21e-13	8367748	3	DNA : SV23 | DNA : SV23 | RNA : SV22 | RNA : SV22 | RNA : SV36 | RNA : SV36 | RNA : SV36	0	NA	2	162931528	162937121	ENSMUSG00000016921	serine and arginine-rich splicing factor 6 [Source:MGI Symbol;Acc:MGI:1915246]		6	4.39224	0.00862069	0.227674	0.666667	8	FALSE	6.5	0	6	0	0.886925	1126	0.351852	Splicing factor; arginine/serine-rich 6; Plays a role in constitutive splicing and modulates the selection of alternative splice sites. Plays a role in the alternative splicing of MAPT/Tau exon 10. Binds to alternative exons of TNC pre-mRNA and promotes the expression of alternatively spliced TNC. Plays a role in wound healing and in the regulation of keratinocyte differentiation and proliferatio…	2.96436	Srsf6
Kcns1	-	-	X	-	-	-	-	6	add.P	1.21e-13	8367748	3	DNA : SV23 | DNA : SV23 | RNA : SV22 | RNA : SV22 | RNA : SV36 | RNA : SV36 | RNA : SV36	0	NA	2	164163619	164171113	ENSMUSG00000040164	K+ voltage-gated channel, subfamily S, 1 [Source:MGI Symbol;Acc:MGI:1197019]		5	4.53017	0.0278336	0.220742	0.4	8	FALSE	10.2	0	5	0	0.882328	9816	0.364286	Potassium voltage-gated channel subfamily S member 1; Potassium channel subunit that does not form functional channels by itself. Can form functional heterotetrameric channels with KCNB1 and KCNB2; modulates the delayed rectifier voltage- gated potassium channel activation and deactivation rates of KCNB1 and KCNB2.	0.050878	Kcns1
Wfdc5	-	-	X	-	-	-	-	6	add.P	1.21e-13	8367748	3	DNA : SV23 | DNA : SV23 | RNA : SV22 | RNA : SV22 | RNA : SV36 | RNA : SV36 | RNA : SV36	0	NA	2	164176327	164182742	ENSMUSG00000040154	WAP four-disulfide core domain 5 [Source:MGI Symbol;Acc:MGI:2384800]		7	4.53448	0.0197519	0.220532	0.52381	9	FALSE	8.57143	0	7	0	0.882184	3720	0.401361	WAP four-disulfide core domain 5	0.523522	Wfdc5
Wfdc12	-	-	X	-	-	-	-	6	add.P	1.21e-13	8367748	3	DNA : SV23 | DNA : SV23 | RNA : SV22 | RNA : SV22 | RNA : SV36 | RNA : SV36 | RNA : SV36	0	NA	2	164189231	164190608	ENSMUSG00000042845	WAP four-disulfide core domain 12 [Source:MGI Symbol;Acc:MGI:2183434]		6	4.37069	0.00303921	0.228797	0.866667	8	FALSE	9.16667	0	6	0	0.887644	2222	0.416667	WAP four-disulfide core domain protein 12; Antibacterial protein which inhibits the growth of E.coli and S.aureus. Putative acid-stable proteinase inhibitor.		Wfdc12
Wfdc15a	-	-	X	-	-	-	-	6	add.P	1.21e-13	8367748	3	DNA : SV23 | DNA : SV23 | RNA : SV22 | RNA : SV22 | RNA : SV36 | RNA : SV36 | RNA : SV36	0	NA	2	164198863	164200130	ENSMUSG00000051769	WAP four-disulfide core domain 15A [Source:MGI Symbol;Acc:MGI:1915471]		0	0	0	0	0	0	TRUE	0	0	0	0	Infinity	0	0	WAP four-disulfide core domain protein 15A; Antibacterial protein.		Wfdc15a
Wfdc15b	-	-	X	-	-	-	-	6	add.P	1.21e-13	8367748	3	DNA : SV23 | DNA : SV23 | RNA : SV22 | RNA : SV22 | RNA : SV36 | RNA : SV36 | RNA : SV36	0	NA	2	164214454	164221660	ENSMUSG00000018211	WAP four-disulfide core domain 15B [Source:MGI Symbol;Acc:MGI:2445041]		7	4.36638	0.0116599	0.229023	0.619048	8	FALSE	7.85714	0	7	0	0.887787	3770	0.367347	WAP four-disulfide core domain protein 15B; Antibacterial protein which inhibits the growth of E.coli and S.aureus.	0.338777	Wfdc15b
Svs2	-	X	X	-	-	-	-	6	add.P	1.21e-13	8367748	3	DNA : SV23 | DNA : SV23 | RNA : SV22 | RNA : SV22 | RNA : SV36 | RNA : SV36 | RNA : SV36	0	NA	2	164235929	164238466	ENSMUSG00000040132	seminal vesicle secretory protein 2 [Source:MGI Symbol;Acc:MGI:1858275]		6	5.0819	0.0224849	0.196777	0.533333	8	FALSE	6.83333	0	6	0	0.863937	14550	0.359649	Seminal vesicle secretory protein 2		Svs2
Svs3b	-	-	X	-	-	-	-	6	add.P	1.21e-13	8367748	3	DNA : SV23 | DNA : SV23 | RNA : SV22 | RNA : SV22 | RNA : SV36 | RNA : SV36 | RNA : SV36	0	NA	2	164254363	164256640	ENSMUSG00000050383	seminal vesicle secretory protein 3B [Source:MGI Symbol;Acc:MGI:3583778]		3	7.0431	0	0.141983	1	10	FALSE	5	0	3	0	0.798563	0	1	Seminal vesicle secretory protein 3B		Svs3b
Svs4	-	-	X	-	-	-	-	6	add.P	1.21e-13	8367748	3	DNA : SV23 | DNA : SV23 | RNA : SV22 | RNA : SV22 | RNA : SV36 | RNA : SV36 | RNA : SV36	0	NA	2	164275952	164278459	ENSMUSG00000016998	seminal vesicle secretory protein 4 [Source:MGI Symbol;Acc:MGI:98450]		5	6.05603	0.00284868	0.165125	0.8	9	FALSE	4.8	0	5	0	0.831466	3604	0.685714	Seminal vesicle secretory protein 4		Svs4
Svs3a	-	-	X	-	-	-	-	6	add.P	1.21e-13	8367748	3	DNA : SV23 | DNA : SV23 | RNA : SV22 | RNA : SV22 | RNA : SV36 | RNA : SV36 | RNA : SV36	0	NA	2	164289268	164291500	ENSMUSG00000017003	seminal vesicle secretory protein 3A [Source:MGI Symbol;Acc:MGI:1927635]		5	5.17241	0.0116022	0.193333	0.7	8	FALSE	6.4	0	5	0	0.86092	7092	0.426667	Seminal vesicle secretory protein 3A	0.040192	Svs3a
Svs6	-	-	X	-	-	-	-	6	add.P	1.21e-13	8367748	3	DNA : SV23 | DNA : SV23 | RNA : SV22 | RNA : SV22 | RNA : SV36 | RNA : SV36 | RNA : SV36	0	NA	2	164316751	164318453	ENSMUSG00000017000	seminal vesicle secretory protein 6 [Source:MGI Symbol;Acc:MGI:106178]		5	6.05603	0.00284868	0.165125	0.8	9	FALSE	4.8	0	5	0	0.831466	3604	0.685714	Seminal vesicle secretory protein 6	0.060478	Svs6
Svs5	-	-	X	-	-	-	-	6	add.P	1.21e-13	8367748	3	DNA : SV23 | DNA : SV23 | RNA : SV22 | RNA : SV22 | RNA : SV36 | RNA : SV36 | RNA : SV36	0	NA	2	164332740	164334396	ENSMUSG00000017004	seminal vesicle secretory protein 5 [Source:MGI Symbol;Acc:MGI:98453]		5	6.05603	0.00284868	0.165125	0.8	9	FALSE	4.8	0	5	0	0.831466	3604	0.685714	Seminal vesicle secretory protein 5		Svs5
Slpi	-	-	X	-	-	-	-	6	add.P	2.42e-18	1521666	7	DNA : F_Rikenellaceae | DNA : F_Rikenellaceae | DNA : G_Alistipes | DNA : G_Alistipes | DNA : SV145 | DNA : SV145 | DNA : SV21 | DNA : SV21 | DNA : SV21 | DNA : SV23 | DNA : SV23 | RNA : SV22 | RNA : SV22 | RNA : SV36 | RNA : SV36 | RNA : SV36	0	NA	2	164354070	164389095	ENSMUSG00000017002	secretory leukocyte peptidase inhibitor [Source:MGI Symbol;Acc:MGI:109297]		6	3.76724	0.0763248	0.265446	0.466667	7	FALSE	9.5	0	6	0	0.907759	21250	0.271429	Secretory leukocyte peptidase inhibitor; Acid-stable proteinase inhibitor with strong affinities for trypsin; chymotrypsin; elastase; and cathepsin G. Modulates the innate immune response after bacterial infection. Contributes to regulate the inflammatory and immune responses to the intracellular parasite L.major. Down-regulates responses to bacterial lipopolysaccharide (LPS). Plays a role in reg…	2.95031	Slpi
Matn4	-	-	X	-	-	-	-	6	add.P	2.42e-18	1521666	7	DNA : F_Rikenellaceae | DNA : F_Rikenellaceae | DNA : G_Alistipes | DNA : G_Alistipes | DNA : SV145 | DNA : SV145 | DNA : SV21 | DNA : SV21 | DNA : SV21 | DNA : SV23 | DNA : SV23 | RNA : SV22 | RNA : SV22 | RNA : SV36 | RNA : SV36 | RNA : SV36	0	NA	2	164389393	164405160	ENSMUSG00000016995	matrilin 4 [Source:MGI Symbol;Acc:MGI:1328314]		1	6.47414	0	0.154461	0	10	FALSE	2	0	1	0	0.817529	0	0	Matrilin 4; Major component of the extracellular matrix of cartilage.	0.637603	Matn4
Rbpjl	-	-	X	-	-	-	-	6	add.P	2.42e-18	1521666	7	DNA : F_Rikenellaceae | DNA : F_Rikenellaceae | DNA : G_Alistipes | DNA : G_Alistipes | DNA : SV145 | DNA : SV145 | DNA : SV21 | DNA : SV21 | DNA : SV21 | DNA : SV23 | DNA : SV23 | RNA : SV22 | RNA : SV22 | RNA : SV36 | RNA : SV36 | RNA : SV36	0	NA	2	164403141	164415448	ENSMUSG00000017007	recombination signal binding protein for immu-globulin kappa J region-like [Source:MGI Symbol;Acc:MGI:1196616]		2	5.47845	0.00862069	0.182533	0	9	FALSE	2	0	2	0	0.850718	1392	0.5	Recombination signal binding protein for immunoglobulin kappa J region-like; Putative transcription factor; which cooperates with EBNA2 to activate transcription; Belongs to the Su(H) family.	2.10466	Rbpjl
Sdc4	-	-	X	-	-	-	-	6	add.P	2.42e-18	1521666	7	DNA : F_Rikenellaceae | DNA : F_Rikenellaceae | DNA : G_Alistipes | DNA : G_Alistipes | DNA : SV145 | DNA : SV145 | DNA : SV21 | DNA : SV21 | DNA : SV21 | DNA : SV23 | DNA : SV23 | RNA : SV22 | RNA : SV22 | RNA : SV36 | RNA : SV36 | RNA : SV36	0	NA	2	164424247	164443887	ENSMUSG00000017009	syndecan 4 [Source:MGI Symbol;Acc:MGI:1349164]		2	4.06034	0.0169335	0.246285	0	7	FALSE	9	0	2	0	0.897989	4450	0.5	Ryudocan core protein; Cell surface proteoglycan that bears heparan sulfate. Regulates exosome biogenesis in concert with SDCBP and PDCD6IP; Belongs to the syndecan proteoglycan family.	3.09934	Sdc4
Sys1	-	-	X	-	-	-	-	6	add.P	2.42e-18	1521666	7	DNA : F_Rikenellaceae | DNA : F_Rikenellaceae | DNA : G_Alistipes | DNA : G_Alistipes | DNA : SV145 | DNA : SV145 | DNA : SV21 | DNA : SV21 | DNA : SV21 | DNA : SV23 | DNA : SV23 | RNA : SV22 | RNA : SV22 | RNA : SV36 | RNA : SV36 | RNA : SV36	0	NA	2	164456964	164479638	ENSMUSG00000045503	SYS1 Golgi-localized integral membrane protein homolog (S. cerevisiae) [Source:MGI Symbol;Acc:MGI:1913710]		8	4.56897	0.036216	0.218868	0.285714	8	FALSE	6.875	0	8	0	0.881034	6282	0.265	SYS1 Golgi-localized integral membrane protein homolog (S. cerevisiae); Involved in protein trafficking. May serve as a receptor for ARFRP1 (By similarity).	2.6655	Sys1
Gm20458	-	-	-	-	-	-	-	0	add.P	2.42e-18	1521666	7	DNA : F_Rikenellaceae | DNA : F_Rikenellaceae | DNA : G_Alistipes | DNA : G_Alistipes | DNA : SV145 | DNA : SV145 | DNA : SV21 | DNA : SV21 | DNA : SV21 | DNA : SV23 | DNA : SV23 | RNA : SV22 | RNA : SV22 | RNA : SV36 | RNA : SV36 | RNA : SV36	0	NA	2	164460967	164490760	ENSMUSG00000090996	predicted gene 20458 [Source:MGI Symbol;Acc:MGI:5141923]
Trp53tg5	-	-	X	-	-	-	-	6	add.P	2.42e-18	1521666	7	DNA : F_Rikenellaceae | DNA : F_Rikenellaceae | DNA : G_Alistipes | DNA : G_Alistipes | DNA : SV145 | DNA : SV145 | DNA : SV21 | DNA : SV21 | DNA : SV21 | DNA : SV23 | DNA : SV23 | RNA : SV22 | RNA : SV22 | RNA : SV36 | RNA : SV36 | RNA : SV36	0	NA	2	164470301	164473724	ENSMUSG00000017720	transformation related protein 53 target 5 [Source:MGI Symbol;Acc:MGI:1920853]		6	4.34052	0.0156578	0.230387	0.4	8	FALSE	8.5	0	6	0	0.888649	4704	0.347222	Transformation related protein 53 target 5		Trp53tg5
Dbndd2	-	-	X	-	-	-	-	6	add.P	2.42e-18	1521666	7	DNA : F_Rikenellaceae | DNA : F_Rikenellaceae | DNA : G_Alistipes | DNA : G_Alistipes | DNA : SV145 | DNA : SV145 | DNA : SV21 | DNA : SV21 | DNA : SV21 | DNA : SV23 | DNA : SV23 | RNA : SV22 | RNA : SV22 | RNA : SV36 | RNA : SV36 | RNA : SV36	0	NA	2	164486106	164493319	ENSMUSG00000017734	dysbindin (dystrobrevin binding protein 1) domain containing 2 [Source:MGI Symbol;Acc:MGI:106562]		3	5.54741	0.0171667	0.180264	0.333333	9	FALSE	4	0	3	0	0.84842	2860	0.407407	Dysbindin (dystrobrevin binding protein 1) domain containing 2; May modulate the activity of casein kinase-1. Inhibits CSNK1D autophosphorylation (in vitro) (By similarity).	1.94118	Dbndd2
Pigt	-	-	X	-	-	-	-	6	add.P	2.42e-18	1521666	7	DNA : F_Rikenellaceae | DNA : F_Rikenellaceae | DNA : G_Alistipes | DNA : G_Alistipes | DNA : SV145 | DNA : SV145 | DNA : SV21 | DNA : SV21 | DNA : SV21 | DNA : SV23 | DNA : SV23 | RNA : SV22 | RNA : SV22 | RNA : SV36 | RNA : SV36 | RNA : SV36	0	NA	2	164497520	164508301	ENSMUSG00000017721	phosphatidyli-sitol glycan anchor biosynthesis, class T [Source:MGI Symbol;Acc:MGI:1926178]		1	1.5	0	0.666667	0	2	FALSE	2	0	1	0	0.75	0	0	Phosphatidylinositol glycan anchor biosynthesis; class T; Component of the GPI transamidase complex. Essential for transfer of GPI to proteins; particularly for formation of carbonyl intermediates (By similarity).	2.63644	Pigt
Wfdc2	-	-	X	-	-	-	-	6	add.P	2.42e-18	1521666	7	DNA : F_Rikenellaceae | DNA : F_Rikenellaceae | DNA : G_Alistipes | DNA : G_Alistipes | DNA : SV145 | DNA : SV145 | DNA : SV21 | DNA : SV21 | DNA : SV21 | DNA : SV23 | DNA : SV23 | RNA : SV22 | RNA : SV22 | RNA : SV36 | RNA : SV36 | RNA : SV36	0	NA	2	164562413	164568510	ENSMUSG00000017723	WAP four-disulfide core domain 2 [Source:MGI Symbol;Acc:MGI:1914951]		17	4.03017	0.0575634	0.248128	0.323529	8	FALSE	7.29412	0	17	0	0.898994	15230	0.235294	WAP four-disulfide core domain protein 2; Broad range protease inhibitor.	3.21623	Wfdc2
Spint3	-	-	X	-	-	-	-	6	add.P	2.42e-18	1521666	7	DNA : F_Rikenellaceae | DNA : F_Rikenellaceae | DNA : G_Alistipes | DNA : G_Alistipes | DNA : SV145 | DNA : SV145 | DNA : SV21 | DNA : SV21 | DNA : SV21 | DNA : SV23 | DNA : SV23 | RNA : SV22 | RNA : SV22 | RNA : SV36 | RNA : SV36 | RNA : SV36	0	NA	2	164569695	164573459	ENSMUSG00000074596	serine peptidase inhibitor, Kunitz type, 3 [Source:MGI Symbol;Acc:MGI:3651470]		1	5.59914	0	0.178599	0	9	FALSE	9	0	1	0	0.846695	0	0	Serine peptidase inhibitor; Kunitz type; 3		Spint3
Wfdc6a	-	-	X	-	-	-	-	6	add.P	2.42e-18	1521666	7	DNA : F_Rikenellaceae | DNA : F_Rikenellaceae | DNA : G_Alistipes | DNA : G_Alistipes | DNA : SV145 | DNA : SV145 | DNA : SV21 | DNA : SV21 | DNA : SV21 | DNA : SV23 | DNA : SV23 | RNA : SV22 | RNA : SV22 | RNA : SV36 | RNA : SV36 | RNA : SV36	0	NA	2	164579519	164585447	ENSMUSG00000074595	WAP four-disulfide core domain 6A [Source:MGI Symbol;Acc:MGI:2684968]		4	5.06897	0.000497431	0.197279	0.333333	9	FALSE	6.75	0	4	0	0.864368	92	0.45	WAP four-disulfide core domain 6A	0.732094	Wfdc6a
Eppin	-	-	X	-	-	-	-	6	add.P	2.42e-18	1521666	7	DNA : F_Rikenellaceae | DNA : F_Rikenellaceae | DNA : G_Alistipes | DNA : G_Alistipes | DNA : SV145 | DNA : SV145 | DNA : SV21 | DNA : SV21 | DNA : SV21 | DNA : SV23 | DNA : SV23 | RNA : SV22 | RNA : SV22 | RNA : SV36 | RNA : SV36 | RNA : SV36	0	NA	2	164588343	164593594	ENSMUSG00000017733	epididymal peptidase inhibitor [Source:MGI Symbol;Acc:MGI:1922776]		10	4.47845	0.0188424	0.223292	0.488889	8	FALSE	9.1	0	10	0	0.884052	10620	0.313793	Serine protease inhibitor-like with Kunitz and WAP domains 1; Serine protease inhibitor that plays an essential role in male reproduction and fertility. Modulates the hydrolysis of SEMG1 by KLK3/PSA (a serine protease); provides antimicrobial protection for spermatozoa in the ejaculate coagulum; and binds SEMG1 thereby inhibiting sperm motility (By similarity).	0.649901	Eppin
Wfdc8	-	-	X	-	-	-	-	6	add.P	2.42e-18	1521666	7	DNA : F_Rikenellaceae | DNA : F_Rikenellaceae | DNA : G_Alistipes | DNA : G_Alistipes | DNA : SV145 | DNA : SV145 | DNA : SV21 | DNA : SV21 | DNA : SV21 | DNA : SV23 | DNA : SV23 | RNA : SV22 | RNA : SV22 | RNA : SV36 | RNA : SV36 | RNA : SV36	0	NA	2	164596458	164613626	ENSMUSG00000070533	WAP four-disulfide core domain 8 [Source:MGI Symbol;Acc:MGI:2685552]		9	4.47845	0.00675923	0.223292	0.444444	8	FALSE	8.55556	0	9	0	0.884052	1952	0.32906	WAP four-disulfide core domain 8		Wfdc8
Wfdc6b	-	-	X	-	-	-	-	6	add.P	2.42e-18	1521666	7	DNA : F_Rikenellaceae | DNA : F_Rikenellaceae | DNA : G_Alistipes | DNA : G_Alistipes | DNA : SV145 | DNA : SV145 | DNA : SV21 | DNA : SV21 | DNA : SV21 | DNA : SV23 | DNA : SV23 | RNA : SV22 | RNA : SV22 | RNA : SV36 | RNA : SV36 | RNA : SV36	0	NA	2	164613522	164618212	ENSMUSG00000070531	WAP four-disulfide core domain 6B [Source:MGI Symbol;Acc:MGI:3575430]		3	4.71121	0	0.21226	1	8	FALSE	12	0	3	0	0.876293	0	0.521739	WAP four-disulfide core domain 6B		Wfdc6b
Wfdc16	-	-	X	-	-	-	-	6	add.P	2.42e-18	1521666	7	DNA : F_Rikenellaceae | DNA : F_Rikenellaceae | DNA : G_Alistipes | DNA : G_Alistipes | DNA : SV145 | DNA : SV145 | DNA : SV21 | DNA : SV21 | DNA : SV21 | DNA : SV23 | DNA : SV23 | RNA : SV22 | RNA : SV22 | RNA : SV36 | RNA : SV36 | RNA : SV36	0	NA	2	164634707	164638796	ENSMUSG00000070530	WAP four-disulfide core domain 16 [Source:MGI Symbol;Acc:MGI:2670994]		5	4.78017	2.17694e-05	0.209197	0.8	8	FALSE	10	0	5	0	0.873994	4	0.526316	WAP four-disulfide core domain 16		Wfdc16
Wfdc9	-	-	X	-	-	-	-	6	add.P	2.42e-18	1521666	7	DNA : F_Rikenellaceae | DNA : F_Rikenellaceae | DNA : G_Alistipes | DNA : G_Alistipes | DNA : SV145 | DNA : SV145 | DNA : SV21 | DNA : SV21 | DNA : SV21 | DNA : SV23 | DNA : SV23 | RNA : SV22 | RNA : SV22 | RNA : SV36 | RNA : SV36 | RNA : SV36	0	NA	2	164649631	164656583	ENSMUSG00000074594	WAP four-disulfide core domain 9 [Source:MGI Symbol;Acc:MGI:3652032]		9	4.60345	0.0114599	0.217228	0.444444	8	FALSE	8.44444	0	9	0	0.879885	2644	0.362319	WAP four-disulfide core domain 9		Wfdc9
Wfdc10	-	-	X	-	-	-	-	6	add.P	2.42e-18	1521666	7	DNA : F_Rikenellaceae | DNA : F_Rikenellaceae | DNA : G_Alistipes | DNA : G_Alistipes | DNA : SV145 | DNA : SV145 | DNA : SV21 | DNA : SV21 | DNA : SV21 | DNA : SV23 | DNA : SV23 | RNA : SV22 | RNA : SV22 | RNA : SV36 | RNA : SV36 | RNA : SV36	0	NA	2	164656046	164657368	ENSMUSG00000070529	WAP four-disulfide core domain 10 [Source:MGI Symbol;Acc:MGI:3616889]		11	4.30172	0.0399736	0.232465	0.418182	7	FALSE	8.45455	0	11	0	0.889943	12654	0.281818	WAP four-disulfide core domain 10	0.130779	Wfdc10
Wfdc11	-	-	X	-	-	-	-	6	add.P	2.42e-18	1521666	7	DNA : F_Rikenellaceae | DNA : F_Rikenellaceae | DNA : G_Alistipes | DNA : G_Alistipes | DNA : SV145 | DNA : SV145 | DNA : SV21 | DNA : SV21 | DNA : SV21 | DNA : SV23 | DNA : SV23 | RNA : SV22 | RNA : SV22 | RNA : SV36 | RNA : SV36 | RNA : SV36	0	NA	2	164662894	164674087	ENSMUSG00000078940	WAP four-disulfide core domain 11 [Source:MGI Symbol;Acc:MGI:3651686]		5	4.65517	0.000134148	0.214815	0.9	8	FALSE	10.2	0	5	0	0.878161	80	0.51	WAP four-disulfide core domain 11	0.128822	Wfdc11
Wfdc13	-	-	X	-	-	-	-	6	add.P	2.42e-18	1521666	7	DNA : F_Rikenellaceae | DNA : F_Rikenellaceae | DNA : G_Alistipes | DNA : G_Alistipes | DNA : SV145 | DNA : SV145 | DNA : SV21 | DNA : SV21 | DNA : SV21 | DNA : SV23 | DNA : SV23 | RNA : SV22 | RNA : SV22 | RNA : SV36 | RNA : SV36 | RNA : SV36	0	NA	2	164685107	164687706	ENSMUSG00000067704	WAP four-disulfide core domain 13 [Source:MGI Symbol;Acc:MGI:3582777]		9	4.28879	0.0140486	0.233166	0.527778	7	FALSE	9	0	9	0	0.890374	4442	0.333333	WAP four-disulfide core domain protein 13; Putative acid-stable proteinase inhibitor.		Wfdc13
Spint4	-	-	X	-	-	-	-	6	add.P	2.42e-18	1521666	7	DNA : F_Rikenellaceae | DNA : F_Rikenellaceae | DNA : G_Alistipes | DNA : G_Alistipes | DNA : SV145 | DNA : SV145 | DNA : SV21 | DNA : SV21 | DNA : SV21 | DNA : SV23 | DNA : SV23 | RNA : SV22 | RNA : SV22 | RNA : SV36 | RNA : SV36 | RNA : SV36	0	NA	2	164698501	164702453	ENSMUSG00000017310	serine protease inhibitor, Kunitz type 4 [Source:MGI Symbol;Acc:MGI:1925489]		11	4.21552	0.0599075	0.237219	0.327273	7	FALSE	8.09091	0	11	0	0.892816	22652	0.245179	Serine protease inhibitor; Kunitz type 4		Spint4
Spint5	-	-	X	-	-	-	-	6	add.P	2.42e-18	1521666	7	DNA : F_Rikenellaceae | DNA : F_Rikenellaceae | DNA : G_Alistipes | DNA : G_Alistipes | DNA : SV145 | DNA : SV145 | DNA : SV21 | DNA : SV21 | DNA : SV21 | DNA : SV23 | DNA : SV23 | RNA : SV22 | RNA : SV22 | RNA : SV36 | RNA : SV36 | RNA : SV36	0	NA	2	164715305	164718068	ENSMUSG00000074593	serine protease inhibitor, Kunitz type 5 [Source:MGI Symbol;Acc:MGI:3651687]		4	4.7931	0.000531546	0.208633	0.666667	8	FALSE	9.75	0	4	0	0.873563	266	0.4875	Serine protease inhibitor; Kunitz type 5		Spint5
Wfdc3	-	-	X	-	-	-	-	6	add.P	2.42e-18	1521666	7	DNA : F_Rikenellaceae | DNA : F_Rikenellaceae | DNA : G_Alistipes | DNA : G_Alistipes | DNA : SV145 | DNA : SV145 | DNA : SV21 | DNA : SV21 | DNA : SV21 | DNA : SV23 | DNA : SV23 | RNA : SV22 | RNA : SV22 | RNA : SV36 | RNA : SV36 | RNA : SV36	0	NA	2	164731180	164745931	ENSMUSG00000076434	WAP four-disulfide core domain 3 [Source:MGI Symbol;Acc:MGI:1923897]		8	4.2069	0.00990106	0.237705	0.607143	8	FALSE	8.625	0	8	0	0.893103	4232	0.359375	WAP four-disulfide core domain 3	0.003375	Wfdc3
Dnttip1	-	-	X	-	-	-	-	6	add.P	2.42e-18	1521666	7	DNA : F_Rikenellaceae | DNA : F_Rikenellaceae | DNA : G_Alistipes | DNA : G_Alistipes | DNA : SV145 | DNA : SV145 | DNA : SV21 | DNA : SV21 | DNA : SV21 | DNA : SV23 | DNA : SV23 | RNA : SV22 | RNA : SV22 | RNA : SV36 | RNA : SV36 | RNA : SV36	0	NA	2	164745983	164768607	ENSMUSG00000017299	deoxynucleotidyltransferase, terminal, interacting protein 1 [Source:MGI Symbol;Acc:MGI:1923483]		5	3.94828	0.0604746	0.253275	0.2	8	FALSE	8.8	0	5	0	0.901724	18178	0.260606	Deoxynucleotidyltransferase; terminal; interacting protein 1; Increases DNTT terminal deoxynucleotidyltransferase activity (in vitro). Also acts as a transcriptional regulator; binding to the consensus sequence 5'-GNTGCATG-3' following an AT- tract. Associates with RAB20 promoter and positively regulates its transcription. Binds DNA and nucleosomes; may recruit HDAC1 complexes to nucleosomes or n…	1.91468	Dnttip1
Ube2c	-	-	X	-	-	-	-	6	add.P	2.42e-18	1521666	7	DNA : F_Rikenellaceae | DNA : F_Rikenellaceae | DNA : G_Alistipes | DNA : G_Alistipes | DNA : SV145 | DNA : SV145 | DNA : SV21 | DNA : SV21 | DNA : SV21 | DNA : SV23 | DNA : SV23 | RNA : SV22 | RNA : SV22 | RNA : SV36 | RNA : SV36 | RNA : SV36	0	NA	2	164769898	164778822	ENSMUSG00000001403	ubiquitin-conjugating enzyme E2C [Source:MGI Symbol;Acc:MGI:1915862]		5	3.72845	0.0273569	0.268208	0.1	7	FALSE	8.6	0	5	0	0.909052	6490	0.32	(E3-independent) E2 ubiquitin-conjugating enzyme C; Accepts ubiquitin from the E1 complex and catalyzes its covalent attachment to other proteins. In vitro catalyzes 'Lys- 11'- and 'Lys-48'-linked polyubiquitination. Acts as an essential factor of the anaphase promoting complex/cyclosome (APC/C); a cell cycle-regulated ubiquitin ligase that controls progression through mitosis. Acts by initiating…	3.06914	Ube2c
Tnnc2	-	-	X	-	-	-	-	6	add.P	2.42e-18	1521666	7	DNA : F_Rikenellaceae | DNA : F_Rikenellaceae | DNA : G_Alistipes | DNA : G_Alistipes | DNA : SV145 | DNA : SV145 | DNA : SV21 | DNA : SV21 | DNA : SV21 | DNA : SV23 | DNA : SV23 | RNA : SV22 | RNA : SV22 | RNA : SV36 | RNA : SV36 | RNA : SV36	0	NA	2	164777161	164779967	ENSMUSG00000017300	troponin C2, fast [Source:MGI Symbol;Acc:MGI:98780]		2	1	0	1	1	1	FALSE	2	0	2	0	1	0	1	Troponin C; skeletal muscle; Troponin is the central regulatory protein of striated muscle contraction. Tn consists of three components: Tn-I which is the inhibitor of actomyosin ATPase; Tn-T which contains the binding site for tropomyosin and Tn-C. The binding of calcium to Tn-C abolishes the inhibitory action of Tn on actin filaments.	1.74006	Tnnc2
Snx21	-	-	X	-	-	-	-	6	add.P	2.42e-18	1521666	7	DNA : F_Rikenellaceae | DNA : F_Rikenellaceae | DNA : G_Alistipes | DNA : G_Alistipes | DNA : SV145 | DNA : SV145 | DNA : SV21 | DNA : SV21 | DNA : SV21 | DNA : SV23 | DNA : SV23 | RNA : SV22 | RNA : SV22 | RNA : SV36 | RNA : SV36 | RNA : SV36	0	NA	2	164785823	164793816	ENSMUSG00000050373	sorting nexin family member 21 [Source:MGI Symbol;Acc:MGI:1917729]		0	0	0	0	0	0	TRUE	0	0	0	0	Infinity	0	0	Sorting nexin family member 21; Binds to membranes enriched in phosphatidylinositol 3- phosphate (PtdIns(P3)) and phosphatidylinositol 4;5-bisphosphate. May be involved in several stages of intracellular trafficking; Belongs to the sorting nexin family.	1.61443	Snx21
Acot8	-	-	X	-	-	-	-	6	add.P	2.42e-18	1521666	7	DNA : F_Rikenellaceae | DNA : F_Rikenellaceae | DNA : G_Alistipes | DNA : G_Alistipes | DNA : SV145 | DNA : SV145 | DNA : SV21 | DNA : SV21 | DNA : SV21 | DNA : SV23 | DNA : SV23 | RNA : SV22 | RNA : SV22 | RNA : SV36 | RNA : SV36 | RNA : SV36	0	NA	2	164792765	164804882	ENSMUSG00000017307	acyl-CoA thioesterase 8 [Source:MGI Symbol;Acc:MGI:2158201]		3	4.71552	0.00772063	0.212066	0.333333	8	FALSE	4.66667	0	3	0	0.876149	1820	0.393939	Peroxisomal acyl-coenzyme A thioester hydrolase 1; Acyl-coenzyme A (acyl-CoA) thioesterases are a group of enzymes that catalyze the hydrolysis of acyl-CoAs to the free fatty acid and coenzyme A (CoASH); providing the potential to regulate intracellular levels of acyl-CoAs; free fatty acids and CoASH. Competes with bile acid CoA:amino acid N- acyltransferase (BAAT) for bile acid-CoA substrate (su…	2.71394	Acot8
Zswim3	X	-	X	-	-	-	-	6	add.P	2.42e-18	1521666	7	DNA : F_Rikenellaceae | DNA : F_Rikenellaceae | DNA : G_Alistipes | DNA : G_Alistipes | DNA : SV145 | DNA : SV145 | DNA : SV21 | DNA : SV21 | DNA : SV21 | DNA : SV23 | DNA : SV23 | RNA : SV22 | RNA : SV22 | RNA : SV36 | RNA : SV36 | RNA : SV36	4	DNA: F_Rikenellaceae | SV145 | G_Alistipes | SV21	2	164805098	164822130	ENSMUSG00000045822	zinc finger SWIM-type containing 3 [Source:MGI Symbol;Acc:MGI:1914788]		0	0	0	0	0	0	TRUE	0	0	0	0	Infinity	0	0	Zinc finger SWIM-type containing 3	0.422588	Zswim3
Zswim1	-	-	X	-	-	-	-	6	add.P	2.42e-18	1521666	7	DNA : F_Rikenellaceae | DNA : F_Rikenellaceae | DNA : G_Alistipes | DNA : G_Alistipes | DNA : SV145 | DNA : SV145 | DNA : SV21 | DNA : SV21 | DNA : SV21 | DNA : SV23 | DNA : SV23 | RNA : SV22 | RNA : SV22 | RNA : SV36 | RNA : SV36 | RNA : SV36	0	NA	2	164822686	164826871	ENSMUSG00000017764	zinc finger SWIM-type containing 1 [Source:MGI Symbol;Acc:MGI:1919221]		0	0	0	0	0	0	TRUE	0	0	0	0	Infinity	0	0	Zinc finger SWIM-type containing 1	0.909691	Zswim1
Spata25	-	-	X	-	-	-	-	6	add.P	2.42e-18	1521666	7	DNA : F_Rikenellaceae | DNA : F_Rikenellaceae | DNA : G_Alistipes | DNA : G_Alistipes | DNA : SV145 | DNA : SV145 | DNA : SV21 | DNA : SV21 | DNA : SV21 | DNA : SV23 | DNA : SV23 | RNA : SV22 | RNA : SV22 | RNA : SV36 | RNA : SV36 | RNA : SV36	0	NA	2	164826389	164828537	ENSMUSG00000017767	spermatogenesis associated 25 [Source:MGI Symbol;Acc:MGI:1922892]		5	4.20259	0.0283501	0.237949	0.1	8	FALSE	5.4	0	5	0	0.893247	5920	0.218182	Spermatogenesis-associated protein 25; May play a role in spermatogenesis; Belongs to the SPATA25 family.		Spata25
Neurl2	-	-	X	-	-	-	-	6	add.P	2.42e-18	1521666	7	DNA : F_Rikenellaceae | DNA : F_Rikenellaceae | DNA : G_Alistipes | DNA : G_Alistipes | DNA : SV145 | DNA : SV145 | DNA : SV21 | DNA : SV21 | DNA : SV21 | DNA : SV23 | DNA : SV23 | RNA : SV22 | RNA : SV22 | RNA : SV36 | RNA : SV36 | RNA : SV36	0	NA	2	164830732	164833456	ENSMUSG00000039873	neuralized E3 ubiquitin protein ligase 2 [Source:MGI Symbol;Acc:MGI:3043305]		6	3.80172	0.0230403	0.263039	0.133333	7	FALSE	8.16667	0	6	0	0.906609	4870	0.261111	Neuralized-like 2 (Drosophila); Plays an important role in the process of myofiber differentiation and maturation. Probable substrate-recognition component of a SCF-like ECS (Elongin BC-CUL2/5-SOCS-box protein) E3 ubiquitin-protein ligase complex; which mediates the ubiquitination of proteins. Probably contributes to catalysis through recognition and positioning of the substrate and the ubiquitin…	0.554672	Neurl2
Ctsa	-	-	X	-	-	-	-	6	add.P	2.42e-18	1521666	7	DNA : F_Rikenellaceae | DNA : F_Rikenellaceae | DNA : G_Alistipes | DNA : G_Alistipes | DNA : SV145 | DNA : SV145 | DNA : SV21 | DNA : SV21 | DNA : SV21 | DNA : SV23 | DNA : SV23 | RNA : SV22 | RNA : SV22 | RNA : SV36 | RNA : SV36 | RNA : SV36	0	NA	2	164832873	164841032	ENSMUSG00000017760	cathepsin A [Source:MGI Symbol;Acc:MGI:97748]		5	3.75862	0	0.266055	1	7	FALSE	11.4	0	5	0	0.908046	0	0.316667	Protective protein for beta-galactosidase; Protective protein appears to be essential for both the activity of beta-galactosidase and neuraminidase; it associates with these enzymes and exerts a protective function necessary for their stability and activity. This protein is also a carboxypeptidase and can deamidate tachykinins.	2.99375	Ctsa
Pltp	-	-	X	-	-	-	-	6	add.P	2.42e-18	1521666	7	DNA : F_Rikenellaceae | DNA : F_Rikenellaceae | DNA : G_Alistipes | DNA : G_Alistipes | DNA : SV145 | DNA : SV145 | DNA : SV21 | DNA : SV21 | DNA : SV21 | DNA : SV23 | DNA : SV23 | RNA : SV22 | RNA : SV22 | RNA : SV36 | RNA : SV36 | RNA : SV36	0	NA	2	164839518	164857711	ENSMUSG00000017754	phospholipid transfer protein [Source:MGI Symbol;Acc:MGI:103151]		0	0	0	0	0	0	TRUE	0	0	0	0	Infinity	0	0	Phospholipid transfer protein; Facilitates the transfer of a spectrum of different lipid molecules; including diacylglycerol; phosphatidic acid; sphingomyelin; phosphatidylcholine; phosphatidylglycerol; cerebroside and phosphatidyl ethanolamine. Essential for the transfer of excess surface lipids from triglyceride-rich lipoproteins to HDL; thereby facilitating the formation of smaller lipoprotein…	3.26678	Pltp
Pcif1	-	-	X	-	-	-	-	6	add.P	2.42e-18	1521666	7	DNA : F_Rikenellaceae | DNA : F_Rikenellaceae | DNA : G_Alistipes | DNA : G_Alistipes | DNA : SV145 | DNA : SV145 | DNA : SV21 | DNA : SV21 | DNA : SV21 | DNA : SV23 | DNA : SV23 | RNA : SV22 | RNA : SV22 | RNA : SV36 | RNA : SV36 | RNA : SV36	0	NA	2	164879304	164894454	ENSMUSG00000039849	PDX1 C-terminal inhibiting factor 1 [Source:MGI Symbol;Acc:MGI:2443858]		0	0	0	0	0	0	TRUE	0	0	0	0	Infinity	0	0	Phosphorylated CTD-interacting factor 1; May play a role in transcription elongation or in coupling transcription to pre-mRNA processing through its association with the phosphorylated C-terminal domain (CTD) of RNAPII largest subunit.	1.55237	Pcif1
Zfp335	-	-	X	-	-	-	-	6	add.P	2.42e-18	1521666	7	DNA : F_Rikenellaceae | DNA : F_Rikenellaceae | DNA : G_Alistipes | DNA : G_Alistipes | DNA : SV145 | DNA : SV145 | DNA : SV21 | DNA : SV21 | DNA : SV21 | DNA : SV23 | DNA : SV23 | RNA : SV22 | RNA : SV22 | RNA : SV36 | RNA : SV36 | RNA : SV36	0	NA	2	164891882	164911757	ENSMUSG00000039834	zinc finger protein 335 [Source:MGI Symbol;Acc:MGI:2682313]		2	5.00862	0.00862069	0.199656	0	8	FALSE	2	0	2	0	0.866379	1068	0.5	NRC-interacting factor 1; Component or associated component of some histone methyltransferase complexes may regulate transcription through recruitment of those complexes on gene promoters. Enhances ligand- dependent transcriptional activation by nuclear hormone receptors. Plays an important role in neural progenitor cell proliferation and self-renewal through the regulation of specific genes invo…	1.5741	Zfp335
Mmp9	-	-	X	-	-	-	-	6	add.P	2.42e-18	1521666	7	DNA : F_Rikenellaceae | DNA : F_Rikenellaceae | DNA : G_Alistipes | DNA : G_Alistipes | DNA : SV145 | DNA : SV145 | DNA : SV21 | DNA : SV21 | DNA : SV21 | DNA : SV23 | DNA : SV23 | RNA : SV22 | RNA : SV22 | RNA : SV36 | RNA : SV36 | RNA : SV36	0	NA	2	164940780	164955850	ENSMUSG00000017737	matrix metallopeptidase 9 [Source:MGI Symbol;Acc:MGI:97011]		12	3.31897	0.12294	0.301299	0.0757576	7	FALSE	7.08333	0	12	0	0.922701	29758	0.115497	92 kDa type IV collagenase; Could play a role in bone osteoclastic resorption. Cleaves type IV and type V collagen into large C-terminal three quarter fragments and shorter N-terminal one quarter fragments (By similarity); Belongs to the peptidase M10A family.	3.65	Mmp9
Slc12a5	-	-	X	-	-	-	-	6	add.P	2.42e-18	1521666	7	DNA : F_Rikenellaceae | DNA : F_Rikenellaceae | DNA : G_Alistipes | DNA : G_Alistipes | DNA : SV145 | DNA : SV145 | DNA : SV21 | DNA : SV21 | DNA : SV21 | DNA : SV23 | DNA : SV23 | RNA : SV22 | RNA : SV22 | RNA : SV36 | RNA : SV36 | RNA : SV36	0	NA	2	164960802	164999731	ENSMUSG00000017740	solute carrier family 12, member 5 [Source:MGI Symbol;Acc:MGI:1862037]		1	5.01293	0	0.199484	0	8	FALSE	4	0	1	0	0.866236	0	0	Electroneutral potassium-chloride cotransporter 2; Mediates electroneutral potassium-chloride cotransport in mature neurons and is required for neuronal Cl(-) homeostasis. As major extruder of intracellular chloride; it establishes the low neuronal Cl(-) levels required for chloride influx after binding of GABA-A and glycine to their receptors; with subsequent hyperpolarization and neuronal inhib…	1.18905	Slc12a5
Ncoa5	-	-	X	-	-	-	-	6	add.P	2.42e-18	1521666	7	DNA : F_Rikenellaceae | DNA : F_Rikenellaceae | DNA : G_Alistipes | DNA : G_Alistipes | DNA : SV145 | DNA : SV145 | DNA : SV21 | DNA : SV21 | DNA : SV21 | DNA : SV23 | DNA : SV23 | RNA : SV22 | RNA : SV22 | RNA : SV36 | RNA : SV36 | RNA : SV36	0	NA	2	165000357	165034867	ENSMUSG00000039804	nuclear receptor coactivator 5 [Source:MGI Symbol;Acc:MGI:2385165]		2	4.76293	0.00432073	0.209955	0	8	FALSE	4	0	2	0	0.874569	654	0.5	Coactivator independent of AF-2; Nuclear receptor coregulator that can have both coactivator and corepressor functions. Interacts with nuclear receptors for steroids (ESR1 and ESR2) independently of the steroid binding domain (AF-2) of the ESR receptors; and with the orphan nuclear receptor NR1D2. Involved in the coactivation of nuclear steroid receptors (ER) as well as the corepression of MYC in…	1.80946	Ncoa5
Cd40	-	-	X	-	-	-	-	6	add.P	2.42e-18	1521666	7	DNA : F_Rikenellaceae | DNA : F_Rikenellaceae | DNA : G_Alistipes | DNA : G_Alistipes | DNA : SV145 | DNA : SV145 | DNA : SV21 | DNA : SV21 | DNA : SV21 | DNA : SV23 | DNA : SV23 | RNA : SV22 | RNA : SV22 | RNA : SV36 | RNA : SV36 | RNA : SV36	0	NA	2	165055627	165072948	ENSMUSG00000017652	CD40 antigen [Source:MGI Symbol;Acc:MGI:88336]		7	3.76724	0.0163242	0.265446	0.285714	7	FALSE	10.8571	0	7	0	0.907759	4216	0.243506	Tumor necrosis factor receptor superfamily member 5; Receptor for TNFSF5/CD40LG. Transduces TRAF6- and MAP3K8-mediated signals that activate ERK in macrophages and B cells; leading to induction of immunoglobulin secretion.	4.64755	Cd40
Cdh22	X	-	X	-	-	-	-	6	add.P	2.42e-18	1521666	7	DNA : F_Rikenellaceae | DNA : F_Rikenellaceae | DNA : G_Alistipes | DNA : G_Alistipes | DNA : SV145 | DNA : SV145 | DNA : SV21 | DNA : SV21 | DNA : SV21 | DNA : SV23 | DNA : SV23 | RNA : SV22 | RNA : SV22 | RNA : SV36 | RNA : SV36 | RNA : SV36	3	DNA: SV23 | RNA: SV36 | SV22	2	165111507	165234853	ENSMUSG00000053166	cadherin 22 [Source:MGI Symbol;Acc:MGI:1341843]		0	0	0	0	0	0	TRUE	0	0	0	0	Infinity	0	0	Pituitary and brain cadherin; Cadherins are calcium-dependent cell adhesion proteins. They preferentially interact with themselves in a homophilic manner in connecting cells; cadherins may thus contribute to the sorting of heterogeneous cell types. PB-cadherins may have a role in the morphological organization of pituitary gland and brain tissues.		Cdh22
Slc35c2	X	-	X	-	-	-	-	6	add.P	2.42e-18	1521666	7	DNA : F_Rikenellaceae | DNA : F_Rikenellaceae | DNA : G_Alistipes | DNA : G_Alistipes | DNA : SV145 | DNA : SV145 | DNA : SV21 | DNA : SV21 | DNA : SV21 | DNA : SV23 | DNA : SV23 | RNA : SV22 | RNA : SV22 | RNA : SV36 | RNA : SV36 | RNA : SV36	2	RNA: SV36 | SV22	2	165276554	165287869	ENSMUSG00000017664	solute carrier family 35, member C2 [Source:MGI Symbol;Acc:MGI:2385166]		2	4.94397	0.00369155	0.202267	0	9	FALSE	3.5	0	2	0	0.868534	634	0.5	Ovarian cancer-overexpressed gene 1 protein; May play an important role in the cellular response to tissue hypoxia. May be either a GDP-fucose transporter that competes with SLC35C1 for GDP-fucose; or a factor that otherwise enhances the fucosylation of Notch and is required for optimal Notch signaling in mammalian cells (By similarity).	1.93719	Slc35c2
Elmo2	-	-	X	-	-	-	-	6	add.P	2.42e-18	1521666	7	DNA : F_Rikenellaceae | DNA : F_Rikenellaceae | DNA : G_Alistipes | DNA : G_Alistipes | DNA : SV145 | DNA : SV145 | DNA : SV21 | DNA : SV21 | DNA : SV21 | DNA : SV23 | DNA : SV23 | RNA : SV22 | RNA : SV22 | RNA : SV36 | RNA : SV36 | RNA : SV36	0	NA	2	165288031	165326479	ENSMUSG00000017670	engulfment and cell motility 2 [Source:MGI Symbol;Acc:MGI:2153045]		1	1	0	1	0	1	FALSE	1	0	1	0	1	0	0	Engulfment and cell motility protein 2; Involved in cytoskeletal rearrangements required for phagocytosis of apoptotic cells and cell motility. Acts in association with DOCK1 and CRK. Was initially proposed to be required in complex with DOCK1 to activate Rac Rho small GTPases. May enhance the guanine nucleotide exchange factor (GEF) activity of DOCK1 (By similarity).	2.35128	Elmo2
Zfp663	-	-	X	-	-	-	-	6	add.P	2.42e-18	1521666	7	DNA : F_Rikenellaceae | DNA : F_Rikenellaceae | DNA : G_Alistipes | DNA : G_Alistipes | DNA : SV145 | DNA : SV145 | DNA : SV21 | DNA : SV21 | DNA : SV21 | DNA : SV23 | DNA : SV23 | RNA : SV22 | RNA : SV22 | RNA : SV36 | RNA : SV36 | RNA : SV36	0	NA	2	165351297	165368729	ENSMUSG00000056824	zinc finger protein 663 [Source:MGI Symbol;Acc:MGI:2685854]		2	4.82759	0.0117038	0.207143	0	8	FALSE	6.5	0	2	0	0.872414	1546	0.5	Gene model 1008; (NCBI); Zinc finger protein 663		Zfp663
Zfp334	-	-	X	-	-	-	-	6	add.P	2.42e-18	1521666	7	DNA : F_Rikenellaceae | DNA : F_Rikenellaceae | DNA : G_Alistipes | DNA : G_Alistipes | DNA : SV145 | DNA : SV145 | DNA : SV21 | DNA : SV21 | DNA : SV21 | DNA : SV23 | DNA : SV23 | RNA : SV22 | RNA : SV22 | RNA : SV36 | RNA : SV36 | RNA : SV36	0	NA	2	165374264	165388259	ENSMUSG00000017667	zinc finger protein 334 [Source:MGI Symbol;Acc:MGI:2388656]		0	0	0	0	0	0	TRUE	0	0	0	0	Infinity	0	0	Zinc finger protein 334		Zfp334
Ocstamp	-	-	X	-	-	-	-	6	add.P	2.42e-18	1521666	7	DNA : F_Rikenellaceae | DNA : F_Rikenellaceae | DNA : G_Alistipes | DNA : G_Alistipes | DNA : SV145 | DNA : SV145 | DNA : SV21 | DNA : SV21 | DNA : SV21 | DNA : SV23 | DNA : SV23 | RNA : SV22 | RNA : SV22 | RNA : SV36 | RNA : SV36 | RNA : SV36	0	NA	2	165393760	165400405	ENSMUSG00000027670	osteoclast stimulatory transmembrane protein [Source:MGI Symbol;Acc:MGI:1921864]		0	0	0	0	0	0	TRUE	0	0	0	0	Infinity	0	0	Osteoclast stimulatory transmembrane protein; Probable cell surface receptor that plays a role in cellular fusion and cell differentiation. Cooperates with DCSTAMP in modulating cell-cell fusion in both osteoclasts and foreign body giant cells (FBGCs). Involved in osteoclast bone resorption. Promotes osteoclast differentiation and may play a role in the multinucleated osteoclast maturation.	0.007967	Ocstamp
Slc13a3	-	-	X	-	-	-	-	6	add.P	2.42e-18	1521666	7	DNA : F_Rikenellaceae | DNA : F_Rikenellaceae | DNA : G_Alistipes | DNA : G_Alistipes | DNA : SV145 | DNA : SV145 | DNA : SV21 | DNA : SV21 | DNA : SV21 | DNA : SV23 | DNA : SV23 | RNA : SV22 | RNA : SV22 | RNA : SV36 | RNA : SV36 | RNA : SV36	0	NA	2	165405028	165473230	ENSMUSG00000018459	solute carrier family 13 (sodium-dependent dicarboxylate transporter), member 3 [Source:MGI Symbol;Acc:MGI:2149635]		6	4.24569	0.0243117	0.235533	0.2	8	FALSE	4.5	0	6	0	0.89181	4284	0.25	Solute carrier family 13 (sodium-dependent dicarboxylate transporter); member 3; High-affinity sodium-dicarboxylate cotransporter that accepts a range of substrates with 4-5 carbon atoms. The stoichiometry is probably 3 Na(+) for 1 divalent succinate.	1.43378	Slc13a3
Trp53rka	-	-	X	-	-	-	-	6	add.P	2.42e-18	1521666	7	DNA : F_Rikenellaceae | DNA : F_Rikenellaceae | DNA : G_Alistipes | DNA : G_Alistipes | DNA : SV145 | DNA : SV145 | DNA : SV21 | DNA : SV21 | DNA : SV21 | DNA : SV23 | DNA : SV23 | RNA : SV22 | RNA : SV22 | RNA : SV36 | RNA : SV36 | RNA : SV36	0	NA	2	165490110	165493324	ENSMUSG00000039725	transformation related protein 53 regulating kinase A [Source:MGI Symbol;Acc:MGI:1918294]		1	5.24138	0	0.190789	0	9	FALSE	6	0	1	0	0.858621	0	0	Transformation-related protein 53-regulating kinase A; RIKEN cDNA 2810408M09 gene	1.32139	Trp53rka
Slc2a10	-	-	X	-	-	-	-	6	add.P	2.42e-18	1521666	7	DNA : F_Rikenellaceae | DNA : F_Rikenellaceae | DNA : G_Alistipes | DNA : G_Alistipes | DNA : SV145 | DNA : SV145 | DNA : SV21 | DNA : SV21 | DNA : SV21 | DNA : SV23 | DNA : SV23 | RNA : SV22 | RNA : SV22 | RNA : SV36 | RNA : SV36 | RNA : SV36	0	NA	2	165503787	165519917	ENSMUSG00000027661	solute carrier family 2 (facilitated glucose transporter), member 10 [Source:MGI Symbol;Acc:MGI:2156687]		3	4.03017	0.012582	0.248128	0	8	FALSE	6.66667	0	3	0	0.898994	2322	0.333333	Solute carrier family 2 (facilitated glucose transporter); member 10; Facilitative glucose transporter.	2.11449	Slc2a10
Eya2	-	-	X	-	-	-	-	6	add.P	2.42e-18	1521666	7	DNA : F_Rikenellaceae | DNA : F_Rikenellaceae | DNA : G_Alistipes | DNA : G_Alistipes | DNA : SV145 | DNA : SV145 | DNA : SV21 | DNA : SV21 | DNA : SV21 | DNA : SV23 | DNA : SV23 | RNA : SV22 | RNA : SV22 | RNA : SV36 | RNA : SV36 | RNA : SV36	0	NA	2	165595032	165771727	ENSMUSG00000017897	EYA transcriptional coactivator and phosphatase 2 [Source:MGI Symbol;Acc:MGI:109341]		0	0	0	0	0	0	TRUE	0	0	0	0	Infinity	0	0	Eyes absent 2 homolog (Drosophila); Functions both as protein phosphatase and as transcriptional coactivator for SIX1; and probably also for SIX2; SIX4 and SIX5. Tyrosine phosphatase that dephosphorylates 'Tyr-142' of histone H2AX (H2AXY142ph) and promotes efficient DNA repair via the recruitment of DNA repair complexes containing MDC1. 'Tyr-142' phosphorylation of histone H2AX plays a central ro…	1.12894	Eya2
Zmynd8	X	-	X	-	-	-	-	6	add.P	2.42e-18	1521666	8	DNA : F_Rikenellaceae | DNA : F_Rikenellaceae | DNA : G_Alistipes | DNA : G_Alistipes | DNA : SV145 | DNA : SV145 | DNA : SV21 | DNA : SV21 | DNA : SV21 | DNA : SV23 | DNA : SV23 | RNA : SV22 | RNA : SV22 | RNA : SV32 | RNA : SV36 | RNA : SV36 | RNA : SV36	2	RNA: SV36 | SV22	2	165784152	165899016	ENSMUSG00000039671	zinc finger, MYND-type containing 8 [Source:MGI Symbol;Acc:MGI:1918025]		1	6.00431	0	0.166547	0	9	FALSE	2	0	1	0	0.83319	0	0	Zinc finger; MYND-type containing 8	1.91804	Zmynd8
Ncoa3	X	-	X	-	-	-	-	6	add.P	1.21e-13	8367748	4	DNA : SV23 | DNA : SV23 | RNA : SV22 | RNA : SV22 | RNA : SV32 | RNA : SV36 | RNA : SV36 | RNA : SV36	2	RNA: SV36 | SV22	2	165992636	166073242	ENSMUSG00000027678	nuclear receptor coactivator 3 [Source:MGI Symbol;Acc:MGI:1276535]		5	4.20259	0.0157913	0.237949	0.1	7	FALSE	5.8	0	5	0	0.893247	3086	0.236364	Thyroid hormone receptor activator molecule 1; Nuclear receptor coactivator that directly binds nuclear receptors and stimulates the transcriptional activities in a hormone-dependent fashion. Plays a central role in creating a multisubunit coactivator complex; probably via remodeling of chromatin. Involved in the coactivation of different nuclear receptors; such as for steroids (GR and ER); retin…	3.11539	Ncoa3
Sulf2	-	-	X	-	-	-	-	6	add.P	1.21e-13	8367748	4	DNA : SV23 | DNA : SV23 | RNA : SV22 | RNA : SV22 | RNA : SV32 | RNA : SV36 | RNA : SV36 | RNA : SV36	0	NA	2	166073089	166155663	ENSMUSG00000006800	sulfatase 2 [Source:MGI Symbol;Acc:MGI:1919293]		0	0	0	0	0	0	TRUE	0	0	0	0	Infinity	0	0	Extracellular sulfatase Sulf-2; Exhibits arylsulfatase activity and highly specific endoglucosamine-6-sulfatase activity. It can remove sulfate from the C-6 position of glucosamine within specific subregions of intact heparin (By similarity); Belongs to the sulfatase family.	2.61735	Sulf2
Adnp	-	-	X	-	-	-	-	6	add.P	1.21e-13	8367748	4	DNA : SV23 | DNA : SV23 | RNA : SV22 | RNA : SV22 | RNA : SV32 | RNA : SV36 | RNA : SV36 | RNA : SV36	0	NA	2	168180986	168207112	ENSMUSG00000051149	activity-dependent neuroprotective protein [Source:MGI Symbol;Acc:MGI:1338758]		0	0	0	0	0	0	TRUE	0	0	0	0	Infinity	0	0	Activity-dependent neuroprotector homeobox protein; Potential transcription factor. May mediate some of the neuroprotective peptide VIP-associated effects involving normal growth and cancer proliferation.	2.24424	Adnp
Gm20716	-	-	X	-	-	-	-	6	add.P	1.21e-13	8367748	4	DNA : SV23 | DNA : SV23 | RNA : SV22 | RNA : SV22 | RNA : SV32 | RNA : SV36 | RNA : SV36 | RNA : SV36	0	NA	2	168180986	168230364	ENSMUSG00000093752	predicted gene 20716 [Source:MGI Symbol;Acc:MGI:5313163]
Dpm1	-	-	X	-	-	-	-	6	add.P	1.21e-13	8367748	4	DNA : SV23 | DNA : SV23 | RNA : SV22 | RNA : SV22 | RNA : SV32 | RNA : SV36 | RNA : SV36 | RNA : SV36	0	NA	2	168209048	168230591	ENSMUSG00000078919	dolichol-phosphate (beta-D) man-syltransferase 1 [Source:MGI Symbol;Acc:MGI:1330239]		2	1	1	1	0	1	FALSE	1	0	2	0	1	2	0	Dolichyl-phosphate beta-D-mannosyltransferase subunit 1; Transfers mannose from GDP-mannose to dolichol monophosphate to form dolichol phosphate mannose (Dol-P-Man) which is the mannosyl donor in pathways leading to N-glycosylation; glycosyl phosphatidylinositol membrane anchoring; and O- mannosylation of proteins; catalytic subunit of the dolichol- phosphate mannose (DPM) synthase complex.	1.93223	Dpm1
Mocs3	-	-	-	-	-	-	-	0	add.P	1.21e-13	8367748	4	DNA : SV23 | DNA : SV23 | RNA : SV22 | RNA : SV22 | RNA : SV32 | RNA : SV36 | RNA : SV36 | RNA : SV36	0	NA	2	168230622	168232594	ENSMUSG00000074576	molybdenum cofactor synthesis 3 [Source:MGI Symbol;Acc:MGI:1916622]		2	6.53879	0	0.152933	1	10	FALSE	2.5	0	2	0	0.815374	0	0.833333	Adenylyltransferase and sulfurtransferase MOCS3; Plays a central role in 2-thiolation of mcm(5)S(2)U at tRNA wobble positions of cytosolic tRNA(Lys); tRNA(Glu) and tRNA(Gln). Also essential during biosynthesis of the molybdenum cofactor. Acts by mediating the C-terminal thiocarboxylation of sulfur carriers URM1 and MOCS2A. Its N-terminus first activates URM1 and MOCS2A as acyl-adenylates (-COAMP)…	1.66065	Mocs3
Kcng1	X	-	X	-	-	-	-	6	add.P	1.21e-13	8367748	4	DNA : SV23 | DNA : SV23 | RNA : SV22 | RNA : SV22 | RNA : SV32 | RNA : SV36 | RNA : SV36 | RNA : SV36	2	RNA: SV36 | SV22	2	168260117	168281736	ENSMUSG00000074575	potassium voltage-gated channel, subfamily G, member 1 [Source:MGI Symbol;Acc:MGI:3616086]		4	4.95259	0.00264941	0.201915	0.5	9	FALSE	9.25	0	4	0	0.868247	664	0.6	Potassium voltage-gated channel; subfamily G; member 1; Potassium channel subunit that does not form functional channels by itself. Can form functional heterotetrameric channels with KCNB1; modulates the delayed rectifier voltage-gated potassium channel activation and deactivation rates of KCNB1; Belongs to the potassium channel family. G (TC 1.A.1.2) subfamily. Kv6.1/KCNG1 sub-subfamily.		Kcng1
Nfatc2	X	-	X	-	-	-	-	6	add.P	1.21e-13	8367748	4	DNA : SV23 | DNA : SV23 | RNA : SV22 | RNA : SV22 | RNA : SV32 | RNA : SV36 | RNA : SV36 | RNA : SV36	2	RNA: SV36 | SV22	2	168476410	168601657	ENSMUSG00000027544	nuclear factor of activated T cells, cytoplasmic, calcineurin dependent 2 [Source:MGI Symbol;Acc:MGI:102463]		1	6.72845	0	0.148623	0	11	FALSE	2	0	1	0	0.809052	0	0	Nuclear factor of activated T cells; cytoplasmic; calcineurin dependent 2; Plays a role in the inducible expression of cytokine genes in T-cells; especially in the induction of the IL-2; IL-3; IL-4; TNF-alpha or GM-CSF. Promotes invasive migration through the activation of GPC6 expression and WNT5A signaling pathway.	2.23937	Nfatc2
Atp9a	X	-	X	-	-	-	-	6	add.P	1.21e-13	8367748	4	DNA : SV23 | DNA : SV23 | RNA : SV22 | RNA : SV22 | RNA : SV32 | RNA : SV36 | RNA : SV36 | RNA : SV36	2	RNA: SV36 | SV22	2	168634438	168742409	ENSMUSG00000027546	ATPase, class II, type 9A [Source:MGI Symbol;Acc:MGI:1330826]		3	4.40086	0.00596815	0.227228	0	8	FALSE	4.33333	0	3	0	0.886638	1138	0.333333	Probable phospholipid-transporting ATPase IIA; ATPase; class II; type 9A	3.31313	Atp9a
Sall4	-	-	X	-	-	-	-	6	add.P	1.21e-13	8367748	4	DNA : SV23 | DNA : SV23 | RNA : SV22 | RNA : SV22 | RNA : SV32 | RNA : SV36 | RNA : SV36 | RNA : SV36	0	NA	2	168748332	168767943	ENSMUSG00000027547	spalt like transcription factor 4 [Source:MGI Symbol;Acc:MGI:2139360]		3	4.78879	0.00173235	0.208821	0.333333	7	FALSE	3.66667	0	3	0	0.873707	230	0.47619	Zinc finger protein SALL4; Transcription factor with a key role in the maintenance and self-renewal of embryonic and hematopoietic stem cells; Belongs to the sal C2H2-type zinc-finger protein family.	1.73011	Sall4
Zfp64	-	-	X	-	-	-	-	6	add.P	1.21e-13	8367748	4	DNA : SV23 | DNA : SV23 | RNA : SV22 | RNA : SV22 | RNA : SV32 | RNA : SV36 | RNA : SV36 | RNA : SV36	0	NA	2	168893331	168955587	ENSMUSG00000027551	zinc finger protein 64 [Source:MGI Symbol;Acc:MGI:107342]		3	4.67672	0.00357895	0.213825	0	9	FALSE	3.33333	0	3	0	0.877443	666	0.333333	Zinc finger protein 64	1.65244	Zfp64
Gm11011	-	-	-	-	-	-	-	0	add.P	1.21e-13	1304066	5	DNA : G_Eisenbergiella | DNA : G_Eisenbergiella | DNA : G_Eisenbergiella | DNA : SV23 | DNA : SV23 | RNA : SV22 | RNA : SV22 | RNA : SV32 | RNA : SV36 | RNA : SV36 | RNA : SV36	0	NA	2	169582845	169587745	ENSMUSG00000078912	predicted gene 11011 [Source:MGI Symbol;Acc:MGI:3779229]		0	0	0	0	0	0	TRUE	0	0	0	0	Infinity	0	0	Predicted gene 11011		Gm11011
Tshz2	X	-	X	-	-	-	-	11	dom.P	1.79e-11	1304066	3	DNA : G_Eisenbergiella | DNA : G_Eisenbergiella | DNA : G_Eisenbergiella | DNA : SV23 | DNA : SV23 | RNA : SV32	2	DNA: SV23 | DNA: G_Eisenbergiella	2	169633013	170071816	ENSMUSG00000047907	teashirt zinc finger family member 2 [Source:MGI Symbol;Acc:MGI:2153084]		3	4.64655	0.00345429	0.215213	0	8	FALSE	4	0	3	0	0.878448	486	0.333333	Teashirt zinc finger family member 2; Probable transcriptional regulator involved in developmental processes. May act as a transcriptional repressor (Potential).	1.10156	Tshz2
Zfp217	-	-	X	-	-	-	-	11	dom.P	1.79e-11	1304066	3	DNA : G_Eisenbergiella | DNA : G_Eisenbergiella | DNA : G_Eisenbergiella | DNA : SV23 | DNA : SV23 | RNA : SV32	0	NA	2	170108643	170148103	ENSMUSG00000052056	zinc finger protein 217 [Source:MGI Symbol;Acc:MGI:2685408]		4	4.28879	0.0160052	0.233166	0	7	FALSE	4	0	4	0	0.890374	2408	0.25	Zinc finger protein 217	2.443	Zfp217
Bcas1	-	-	X	-	-	-	-	10	dom.P	1.79e-11	1304066	3	DNA : G_Eisenbergiella | DNA : G_Eisenbergiella | DNA : G_Eisenbergiella | DNA : SV23 | DNA : SV23 | RNA : SV32	0	NA	2	170346991	170427845	ENSMUSG00000013523	breast carci-ma amplified sequence 1 [Source:MGI Symbol;Acc:MGI:1924210]		1	5.28448	0	0.189233	0	8	FALSE	4	0	1	0	0.857184	0	0	Breast carcinoma amplified sequence 1	2.42014	Bcas1
Cyp24a1	-	-	X	-	-	-	-	10	dom.P	1.79e-11	1304066	3	DNA : G_Eisenbergiella | DNA : G_Eisenbergiella | DNA : G_Eisenbergiella | DNA : SV23 | DNA : SV23 | RNA : SV32	0	NA	2	170482708	170497145	ENSMUSG00000038567	cytochrome P450, family 24, subfamily a, polypeptide 1 [Source:MGI Symbol;Acc:MGI:88593]		4	3.69397	0.0297879	0.270712	0	8	FALSE	7.25	0	4	0	0.910201	5762	0.25	1;25-dihydroxyvitamin D(3) 24-hydroxylase; mitochondrial; Has a role in maintaining calcium homeostasis. Catalyzes the NADPH-dependent 24-hydroxylation of calcidiol (25- hydroxyvitamin D(3)) and calcitriol (1-alpha;25-dihydroxyvitamin D(3)). The enzyme can perform up to 6 rounds of hydroxylation of calcitriol leading to calcitroic acid; Belongs to the cytochrome P450 family.	2.67408	Cyp24a1
Pfdn4	X	-	X	-	-	-	-	10	dom.P	1.79e-11	1304066	3	DNA : G_Eisenbergiella | DNA : G_Eisenbergiella | DNA : G_Eisenbergiella | DNA : SV23 | DNA : SV23 | RNA : SV32	1	DNA: G_Eisenbergiella	2	170496428	170519123	ENSMUSG00000052033	prefoldin 4 [Source:MGI Symbol;Acc:MGI:1923512]		4	4.1681	0.019113	0.239917	0	8	FALSE	5.5	0	4	0	0.894397	3924	0.264706	Prefoldin subunit 4; Binds specifically to cytosolic chaperonin (c-CPN) and transfers target proteins to it. Binds to nascent polypeptide chain and promotes folding in an environment in which there are many competing pathways for nonnative proteins.	1.53107	Pfdn4
Dok5	X	-	X	-	-	-	-	10	add.P	1.79e-11	9393872	2	DNA : SV23 | DNA : SV23 | RNA : SV32	1	DNA: G_Eisenbergiella | DNA: G_Eisenbergiella	2	170731807	170879769	ENSMUSG00000027560	docking protein 5 [Source:MGI Symbol;Acc:MGI:1924079]		5	4.04741	0.0122391	0.247071	0.2	8	FALSE	7.8	0	5	0	0.89842	2430	0.255172	Downstream of tyrosine kinase 5; DOK proteins are enzymatically inert adaptor or scaffolding proteins. They provide a docking platform for the assembly of multimolecular signaling complexes. DOK5 functions in RET-mediated neurite outgrowth and plays a positive role in activation of the MAP kinase pathway. Putative link with downstream effectors of RET in neuronal differentiation.	0.610185	Dok5
Mc3r	-	-	-	-	-	-	-	0	add.P	1.73e-09	15026141	1	RNA : SV32	0	NA	2	172248492	172251114	ENSMUSG00000038537	mela-cortin 3 receptor [Source:MGI Symbol;Acc:MGI:96929]		11	3.59483	0.0570203	0.278177	0.345455	7	FALSE	9.36364	0	11	0	0.913506	9264	0.165584	Melanocortin 3 receptor; Receptor for MSH (alpha; beta and gamma) and ACTH. This receptor is mediated by G proteins which activate adenylate cyclase. Required for expression of anticipatory patterns of activity and wakefulness during periods of limited nutrient availability and for the normal regulation of circadian clock activity in the brain.	1.53381	Mc3r
Fam210b	-	-	-	-	-	-	-	0	add.P	1.73e-09	15026141	1	RNA : SV32	0	NA	2	172345565	172355749	ENSMUSG00000027495	family with sequence similarity 210, member B [Source:MGI Symbol;Acc:MGI:1914267]		0	0	0	0	0	0	TRUE	0	0	0	0	Infinity	0	0	Family with sequence similarity 210; member B; Plays a role in erythroid differentiation. Involved in cell proliferation and tumor cell growth suppression. Involved in the metabolic reprogramming of cancer cells in a PDK4-dependent manner; Belongs to the FAM210 family.	1.46616	Fam210b
Aurka	-	-	-	-	-	-	-	0	add.P	1.73e-09	15026141	1	RNA : SV32	0	NA	2	172356190	172370535	ENSMUSG00000027496	aurora kinase A [Source:MGI Symbol;Acc:MGI:894678]		7	3.5819	0.0552185	0.279182	0.0952381	7	FALSE	6.57143	0	7	0	0.913937	8944	0.171429	Serine/threonine-protein kinase aurora-A; Mitotic serine/threonine kinases that contributes to the regulation of cell cycle progression. Associates with the centrosome and the spindle microtubules during mitosis and plays a critical role in various mitotic events including the establishment of mitotic spindle; centrosome duplication; centrosome separation as well as maturation; chromosomal alignm…	3.29497	Aurka
Cstf1	-	-	-	-	-	-	-	0	add.P	1.73e-09	15026141	1	RNA : SV32	0	NA	2	172370681	172382448	ENSMUSG00000027498	cleavage stimulation factor, 3' pre-RNA, subunit 1 [Source:MGI Symbol;Acc:MGI:1914587]		12	3.68534	0.0856786	0.271345	0.257576	7	FALSE	6	0	12	0	0.910489	13028	0.15991	Cleavage stimulation factor; 3' pre-RNA; subunit 1; One of the multiple factors required for polyadenylation and 3'-end cleavage of mammalian pre-mRNAs. May be responsible for the interaction of CSTF with other factors to form a stable complex on the pre-mRNA (By similarity).	1.46215	Cstf1
Cass4	X	-	-	-	-	-	-	0	add.P	4.29e-12	15026141	1	RNA : SV32	3	RNA: SV139 | G_Anaerostipes | SV79	2	172393794	172433757	ENSMUSG00000074570	Cas scaffolding protein family member 4 [Source:MGI Symbol;Acc:MGI:2444482]		4	4.1681	0.00263673	0.239917	0.833333	8	FALSE	8.25	0	4	0	0.894397	656	0.375	Cas scaffolding protein family member 4; Docking protein that plays a role in tyrosine kinase- based signaling related to cell adhesion and cell spreading. Regulates PTK2/FAK1 activity; focal adhesion integrity; and cell spreading (By similarity).		Cass4
Rtf2	X	-	X	-	-	-	-	6	dom.P	4.29e-12	483541	4	RNA : G_Anaerostipes | RNA : G_Anaerostipes | RNA : G_Anaerostipes | RNA : SV139 | RNA : SV139 | RNA : SV32 | RNA : SV79 | RNA : SV79 | RNA : SV79	3	RNA: SV139 | G_Anaerostipes | SV79	2	172440556	172469908	ENSMUSG00000027502	replication termination factor 2 [Source:MGI Symbol;Acc:MGI:1913654]		3	4.43966	0.00183447	0.225243	0.333333	8	FALSE	6.66667	0	3	0	0.885345	322	0.395833	Replication termination factor 2 domain containing 1; Belongs to the rtf2 family.	1.50343	Rtf2
Gcnt7	-	-	X	-	-	-	-	6	dom.P	4.29e-12	483541	4	RNA : G_Anaerostipes | RNA : G_Anaerostipes | RNA : G_Anaerostipes | RNA : SV139 | RNA : SV139 | RNA : SV32 | RNA : SV79 | RNA : SV79 | RNA : SV79	0	NA	2	172450313	172458596	ENSMUSG00000074569	glucosaminyl (N-acetyl) transferase family member 7 [Source:MGI Symbol;Acc:MGI:3606143]		4	4.1681	0.00263673	0.239917	0.833333	8	FALSE	8.25	0	4	0	0.894397	656	0.375	Beta-1;3-galactosyl-O-glycosyl-glycoprotein beta-1;6-N-acetylglucosaminyltransferase 7; Glycosyltransferase; Belongs to the glycosyltransferase 14 family.	1.00443	Gcnt7
Fam209	-	-	X	-	-	-	-	6	dom.P	4.29e-12	483541	4	RNA : G_Anaerostipes | RNA : G_Anaerostipes | RNA : G_Anaerostipes | RNA : SV139 | RNA : SV139 | RNA : SV32 | RNA : SV79 | RNA : SV79 | RNA : SV79	0	NA	2	172472520	172474331	ENSMUSG00000027505	family with sequence similarity 209 [Source:MGI Symbol;Acc:MGI:1923676]		0	0	0	0	0	0	TRUE	0	0	0	0	Infinity	0	0	Family with sequence similarity 209	0.145607	Fam209
Tfap2c	-	-	X	-	-	-	-	6	dom.P	4.29e-12	483541	4	RNA : G_Anaerostipes | RNA : G_Anaerostipes | RNA : G_Anaerostipes | RNA : SV139 | RNA : SV139 | RNA : SV32 | RNA : SV79 | RNA : SV79 | RNA : SV79	0	NA	2	172549593	172558622	ENSMUSG00000028640	transcription factor AP-2, gamma [Source:MGI Symbol;Acc:MGI:106032]		5	4.18966	0.023112	0.238683	0.2	7	FALSE	3.4	0	5	0	0.893678	3120	0.266667	Activating enhancer-binding protein 2 gamma; Sequence-specific DNA-binding protein that interacts with inducible viral and cellular enhancer elements to regulate transcription of selected genes. AP-2 factors bind to the consensus sequence 5'-GCCNNNGGC-3' and activate genes involved in a large spectrum of important biological functions including proper eye; face; body wall; limb and neural tube de…	1.45729	Tfap2c
Bmp7	X	-	X	-	-	-	-	6	dom.P	4.29e-12	483541	4	RNA : G_Anaerostipes | RNA : G_Anaerostipes | RNA : G_Anaerostipes | RNA : SV139 | RNA : SV139 | RNA : SV32 | RNA : SV79 | RNA : SV79 | RNA : SV79	3	RNA: G_Anaerostipes | SV139 | SV79	2	172868012	172940321	ENSMUSG00000008999	bone morphogenetic protein 7 [Source:MGI Symbol;Acc:MGI:103302]		8	3.52155	0.0776147	0.283966	0.107143	7	FALSE	7.5	0	8	0	0.915948	14216	0.154891	Bone morphogenetic protein 7; Induces cartilage and bone formation. May be the osteoinductive factor responsible for the phenomenon of epithelial osteogenesis. Plays a role in calcium regulation and bone homeostasis.	4.57272	Bmp7
Spo11	-	-	-	-	-	-	-	0	add.P	1.73e-09	15026141	1	RNA : SV32	0	NA	2	172977700	172993576	ENSMUSG00000005883	SPO11 meiotic protein covalently bound to DSB [Source:MGI Symbol;Acc:MGI:1349669]		5	3.54741	0.0631402	0.281896	0.3	8	FALSE	8.4	0	5	0	0.915086	10442	0.235294	SPO11 meiotic protein covalently bound to DSB homolog (S. cerevisiae); Isoform 1: Component of a topoisomerase 6 complex specifically required for meiotic recombination. Together with TOP6BL; mediates DNA cleavage that forms the double-strand breaks (DSB) that initiate meiotic recombination. The complex promotes relaxation of negative and positive supercoiled DNA and DNA decatenation through clea…	1.24516	Spo11
Rae1	-	-	-	-	-	-	-	0	add.P	1.73e-09	15026141	1	RNA : SV32	0	NA	2	173000117	173015739	ENSMUSG00000027509	ribonucleic acid export 1 [Source:MGI Symbol;Acc:MGI:1913929]		6	4.00431	0.0321841	0.249731	0.2	8	FALSE	4	0	6	0	0.899856	4304	0.233333	RAE1 RNA export 1 homolog (S. pombe); Plays a role in mitotic bipolar spindle formation. Binds mRNA. May function in nucleocytoplasmic transport and in directly or indirectly attaching cytoplasmic mRNPs to the cytoskeleton.	2.70736	Rae1
Rbm38	-	-	-	-	-	-	-	0	add.P	1.73e-09	15026141	1	RNA : SV32	0	NA	2	173020498	173034734	ENSMUSG00000027510	RNA binding motif protein 38 [Source:MGI Symbol;Acc:MGI:1889294]		6	3.8319	0.0357426	0.260967	0.266667	7	FALSE	5.5	0	6	0	0.905603	4264	0.222222	RNA-binding region-containing protein 1; RNA-binding protein that specifically bind the 3'-UTR of CDKN1A transcripts; leading to maintain the stability of CDKN1A transcripts; thereby acting as a mediator of the p53/TP53 family to regulate CDKN1A. CDKN1A is a cyclin-dependent kinase inhibitor transcriptionally regulated by the p53/TP53 family to induce cell cycle arrest. Has the ability to induce …	2.88479	Rbm38
Ctcfl	-	-	-	-	-	-	-	0	add.P	1.73e-09	15026141	1	RNA : SV32	0	NA	2	173093609	173119525	ENSMUSG00000070495	CCCTC-binding factor (zinc finger protein)-like [Source:MGI Symbol;Acc:MGI:3652571]		2	4.62069	0	0.216418	1	8	FALSE	5.5	0	2	0	0.87931	0	0.611111	CCCTC-binding factor (zinc finger protein)-like; Testis-specific DNA binding protein responsible for insulator function; nuclear architecture and transcriptional control; which probably acts by recruiting epigenetic chromatin modifiers. Plays a key role in gene imprinting in male germline; by participating in the establishment of differential methylation at the IGF2/H19 imprinted control region (…	1.7203	Ctcfl
Pck1	-	X	-	-	-	-	-	0	add.P	1.73e-09	15026141	1	RNA : SV32	0	NA	2	173153048	173159273	ENSMUSG00000027513	phosphoe-lpyruvate carboxykinase 1, cytosolic [Source:MGI Symbol;Acc:MGI:97501]		8	3.66379	0.0699469	0.272941	0.214286	7	FALSE	7.5	0	8	0	0.911207	13140	0.18125	Phosphoenolpyruvate carboxykinase; cytosolic [GTP]; Catalyzes the conversion of oxaloacetate (OAA) to phosphoenolpyruvate (PEP); the rate-limiting step in the metabolic pathway that produces glucose from lactate and other precursors derived from the citric acid cycle.	3.52682	Pck1
Fxr1	X	X	-	-	-	-	-	0	add.P	3.72e-11	3821009	2	DNA : SV22 | RNA : SV97 | RNA : SV97	1	RNA: SV97	3	34019943	34070322	ENSMUSG00000027680	fragile X mental retardation gene 1, autosomal homolog [Source:MGI Symbol;Acc:MGI:104860]		2	4.82328	0.00308204	0.207328	0	8	FALSE	5.5	0	2	0	0.872557	440	0.5	Fragile X mental retardation syndrome-related protein 1; RNA-binding protein required for embryonic and postnatal development of muscle tissue. May regulate intracellular transport and local translation of certain mRNAs.	2.13753	Fxr1
Nhlrc3	X	-	-	-	X	-	-	0	dom.P	5.51e-12	2510402	1	RNA : SV85 | RNA : SV85 | RNA : SV85	1	RNA: SV85	3	53448583	53463332	ENSMUSG00000042997	NHL repeat containing 3 [Source:MGI Symbol;Acc:MGI:2444520]		5	3.75862	0	0.266055	1	7	FALSE	11.4	0	5	0	0.908046	0	0.316667	NHL repeat containing 3	1.11576	Nhlrc3
Gstm5	-	X	-	-	-	X	-	0	dom.P	3.35e-12	11572875	2	DNA : SV142 | DNA : SV142 | RNA : SV142 | RNA : SV142 | RNA : SV142 | RNA : SV98	0	NA	3	107895821	107898686	ENSMUSG00000004032	glutathione S-transferase, mu 5 [Source:MGI Symbol;Acc:MGI:1309466]		7	4.66379	0.000817557	0.214418	0.809524	8	FALSE	8.14286	0	7	0	0.877874	560	0.508929	Glutathione S-transferase; mu 5; Conjugation of reduced glutathione to a wide number of exogenous and endogenous hydrophobic electrophiles; Belongs to the GST superfamily. Mu family.	2.72721	Gstm5
Enpep	X	X	-	-	-	-	-	0	add.P	6.8e-09	14296832	1	RNA : SV151	1	RNA: SV151	3	129269175	129332720	ENSMUSG00000028024	glutamyl ami-peptidase [Source:MGI Symbol;Acc:MGI:106645]		2	5.36638	0.00862069	0.186345	0	9	FALSE	2	0	2	0	0.854454	1280	0.5	Glutamyl aminopeptidase; Appears to have a role in the catabolic pathway of the renin-angiotensin system. Probably plays a role in regulating growth and differentiation of early B-lineage cells; Belongs to the peptidase M1 family.	3.40175	Enpep
Ostc	-	X	-	-	-	-	X	0	add.P	6.08e-11	13247847	2	DNA : SV45 | DNA : SV45 | RNA : SV151	0	NA	3	130695912	130709444	ENSMUSG00000041084	oligosaccharyltransferase complex subunit (-n-catalytic) [Source:MGI Symbol;Acc:MGI:1913607]
Tacr3	X	-	X	X	-	-	-	2	dom.P	3.98e-11	538957	5	DNA : SV45 | DNA : SV45 | RNA : SV101 | RNA : SV101 | RNA : SV101 | RNA : SV151 | RNA : SV4 | RNA : SV82	1	RNA: SV4 | RNA: SV4	3	134829007	134934579	ENSMUSG00000028172	tachykinin receptor 3 [Source:MGI Symbol;Acc:MGI:892968]		10	4.09483	0	0.244211	1	8	FALSE	15.3	0	10	0	0.896839	0	0.425	Neurokinin B receptor; This is a receptor for the tachykinin neuropeptide neuromedin-K (neurokinin B). It is associated with G proteins that activate a phosphatidylinositol-calcium second messenger system.	1.65241	Tacr3
Ptgfr	X	-	-	X	-	-	-	0	add.P	1.85e-18	11307805	3	DNA : SV23 | RNA : SV101 | RNA : SV101 | RNA : SV101 | RNA : SV23 | RNA : SV23 | RNA : SV23 | RNA : SV99 | RNA : SV99 | RNA : SV99	3	RNA: SV101 | RNA: SV99 | SV23	3	151796502	151837630	ENSMUSG00000028036	prostaglandin F receptor [Source:MGI Symbol;Acc:MGI:97796]		10	4.09483	0	0.244211	1	8	FALSE	15.3	0	10	0	0.896839	0	0.425	Prostaglandin F2-alpha receptor; Receptor for prostaglandin F2-alpha (PGF2-alpha). The activity of this receptor is mediated by G proteins which activate a phosphatidylinositol-calcium second messenger system. Initiates luteolysis in the corpus luteum (By similarity).	1.05902	Ptgfr
Cth	-	X	-	-	-	-	-	0	dom.P	1.41e-16	4457315	2	DNA : SV23 | DNA : SV23 | DNA : SV23 | RNA : SV99 | RNA : SV99 | RNA : SV99	0	NA	3	157894248	157925077	ENSMUSG00000028179	cystathionase (cystathionine gamma-lyase) [Source:MGI Symbol;Acc:MGI:1339968]		2	4.87069	0	0.20531	1	8	FALSE	7.5	0	2	0	0.870977	0	0.625	Cystathionase (cystathionine gamma-lyase); Catalyzes the last step in the trans-sulfuration pathway from methionine to cysteine. Has broad substrate specificity. Converts cystathionine to cysteine; ammonia and 2-oxobutanoate. Converts two cysteine molecules to lanthionine and hydrogen sulfide. Can also accept homocysteine as substrate. Specificity depends on the levels of the endogenous substrate…	3.04856	Cth
Tlr4	X	-	-	-	-	-	-	0	add.P	4.48e-118	10810489	1	RNA : SV33 | RNA : SV33	3	DNA: G_Dorea | RNA: SV184 | G_Dorea | SV293	4	66827584	66930284	ENSMUSG00000039005	toll-like receptor 4 [Source:MGI Symbol;Acc:MGI:96824]		6	3.85776	0.00458504	0.259218	0.4	8	FALSE	12	0	6	0	0.904741	1190	0.288618	Toll-like receptor 4; Cooperates with LY96 and CD14 to mediate the innate immune response to bacterial lipopolysaccharide (LPS). Acts via MYD88; TIRAP and TRAF6; leading to NF-kappa-B activation; cytokine secretion and the inflammatory response. Also involved in LPS-independent inflammatory responses triggered by free fatty acids; such as palmitate. In complex with TLR6; promotes sterile inflamma…	3.97173	Tlr4
Brinp1	-	-	X	-	-	-	-	1	add.P	4.48e-118	5447602	3	DNA : G_Dorea | DNA : G_Dorea | DNA : G_Dorea | RNA : G_Dorea | RNA : G_Dorea | RNA : G_Dorea | RNA : SV184 | RNA : SV184 | RNA : SV184 | RNA : SV293 | RNA : SV293 | RNA : SV293	0	NA	4	68761514	68954397	ENSMUSG00000028351	bone morphogenic protein/reti-ic acid inducible neural specific 1 [Source:MGI Symbol;Acc:MGI:1928478]		1	5.50431	0	0.181676	0	10	FALSE	12	0	1	0	0.849856	0	0	Bone morphogenic protein/retinoic acid inducible neural specific 1; Inhibits cell proliferation by negative regulation of the G1/S transition. Mediates cell death which is not of the classical apoptotic type and regulates expression of components of the plasminogen pathway; Belongs to the BRINP family.	0.403219	Brinp1
Cdk5rap2	X	-	-	-	-	-	-	0	add.P	4.48e-118	5447602	3	DNA : G_Dorea | DNA : G_Dorea | DNA : G_Dorea | RNA : G_Dorea | RNA : G_Dorea | RNA : G_Dorea | RNA : SV184 | RNA : SV184 | RNA : SV184 | RNA : SV293 | RNA : SV293 | RNA : SV293	3	DNA: G_Dorea | RNA: SV293 | SV184 | G_Dorea	4	70216856	70410443	ENSMUSG00000039298	CDK5 regulatory subunit associated protein 2 [Source:MGI Symbol;Acc:MGI:2384875]		3	4.02155	0.0171667	0.24866	0.333333	7	FALSE	7.66667	0	3	0	0.899282	2132	0.385965	CDK5 regulatory subunit associated protein 2; Potential regulator of CDK5 activity via its interaction with CDK5R1. Involved in regulation of mitotic spindle orientation (By similarity). Negative regulator of centriole disengagement (licensing) which maintains centriole engagement and cohesion. Involved in regulation of mitotic spindle orientation and brain development. Regulates centrosomal matu…	1.59765	Cdk5rap2
Megf9	-	-	-	-	-	-	-	0	add.P	4.48e-118	5447602	3	DNA : G_Dorea | DNA : G_Dorea | DNA : G_Dorea | RNA : G_Dorea | RNA : G_Dorea | RNA : G_Dorea | RNA : SV184 | RNA : SV184 | RNA : SV184 | RNA : SV293 | RNA : SV293 | RNA : SV293	0	NA	4	70427065	70534995	ENSMUSG00000039270	multiple EGF-like-domains 9 [Source:MGI Symbol;Acc:MGI:1918264]		1	6.36207	0	0.157182	0	10	FALSE	2	0	1	0	0.821264	0	0	Multiple epidermal growth factor-like domains protein 9; Multiple EGF-like-domains 9	1.00334	Megf9
Tle1	X	-	X	-	-	-	-	2	add.P	4.48e-118	5447602	3	DNA : G_Dorea | DNA : G_Dorea | DNA : G_Dorea | RNA : G_Dorea | RNA : G_Dorea | RNA : G_Dorea | RNA : SV184 | RNA : SV184 | RNA : SV184 | RNA : SV293 | RNA : SV293 | RNA : SV293	4	DNA: G_Dorea | RNA: SV184 | SV293 | G_Dorea | SV19	4	72117142	72200919	ENSMUSG00000008305	transducin-like enhancer of split 1 [Source:MGI Symbol;Acc:MGI:104636]		1	5.48707	0	0.182247	0	9	FALSE	3	0	1	0	0.850431	0	0	Transducin-like enhancer of split 1; homolog of Drosophila E(spl); Transcriptional corepressor that binds to a number of transcription factors. Inhibits NF-kappa-B-regulated gene expression. Inhibits the transcriptional activation mediated by FOXA2; and by CTNNB1 and TCF family members in Wnt signaling. The effects of full-length TLE family members may be modulated by association with dominant-ne…	2.71824	Tle1
Zfp352	-	-	X	-	-	-	-	6	add.P	5.47e-14	6644606	4	DNA : SV142 | DNA : SV142 | DNA : SV64 | DNA : SV98 | DNA : SV98 | RNA : SV142 | RNA : SV142 | RNA : SV142 | RNA : SV33 | RNA : SV64 | RNA : SV98 | RNA : SV98 | RNA : SV98	0	NA	4	90218820	90225702	ENSMUSG00000070902	zinc finger protein 352 [Source:MGI Symbol;Acc:MGI:2387418]		0	0	0	0	0	0	TRUE	0	0	0	0	Infinity	0	0	Zinc finger protein 352	0.844659	Zfp352
Elavl2	X	-	X	-	-	-	-	6	add.P	5.47e-14	6644606	5	DNA : SV142 | DNA : SV142 | DNA : SV64 | DNA : SV98 | DNA : SV98 | RNA : SV115 | RNA : SV142 | RNA : SV142 | RNA : SV142 | RNA : SV33 | RNA : SV64 | RNA : SV98 | RNA : SV98 | RNA : SV98	1	RNA: SV33 | RNA: SV33 | RNA: SV33	4	91250763	91400785	ENSMUSG00000008489	ELAV like RNA binding protein 1 [Source:MGI Symbol;Acc:MGI:1100887]		7	4.11638	0.0236441	0.242932	0.47619	8	FALSE	6.42857	0	7	0	0.896121	2524	0.267081	ELAV (embryonic lethal; abnormal vision; Drosophila)-like 2 (Hu antigen B); Binds RNA. Seems to recognize a GAAA motif. Can bind to its own 3'-UTR; the FOS 3'-UTR and the ID 3'-UTR.	1.63862	Elavl2
Izumo3	X	-	X	-	-	-	-	8	add.P	5.47e-14	6644606	5	DNA : SV142 | DNA : SV142 | DNA : SV64 | DNA : SV98 | DNA : SV98 | RNA : SV115 | RNA : SV142 | RNA : SV142 | RNA : SV142 | RNA : SV33 | RNA : SV64 | RNA : SV98 | RNA : SV98 | RNA : SV98	1	RNA: SV33 | RNA: SV33 | RNA: SV33	4	92144329	92147234	ENSMUSG00000028533	IZUMO family member 3 [Source:MGI Symbol;Acc:MGI:1916564]		0	0	0	0	0	0	TRUE	0	0	0	0	Infinity	0	0	Izumo sperm-egg fusion protein 3; IZUMO family member 3		Izumo3
Gm12666	-	-	-	-	-	-	-	0	add.P	5.47e-14	6644606	5	DNA : SV142 | DNA : SV142 | DNA : SV64 | DNA : SV98 | DNA : SV98 | RNA : SV115 | RNA : SV142 | RNA : SV142 | RNA : SV142 | RNA : SV33 | RNA : SV64 | RNA : SV98 | RNA : SV98 | RNA : SV98	0	NA	4	92190744	92191749	ENSMUSG00000066107	predicted gene 12666 [Source:MGI Symbol;Acc:MGI:3650864]		0	0	0	0	0	0	TRUE	0	0	0	0	Infinity	0	0	Predicted gene 12666		Gm12666
Grik3	X	-	X	-	X	-	-	5	add.P	4.4e-16	2234303	3	RNA : unclassified_O_Clostridiales | RNA : SV97 | RNA : SV97 | RNA : SV98	2	RNA: unclassified_O_Clostridiales | RNA: SV234	4	125490700	125714173	ENSMUSG00000001985	glutamate receptor, io-tropic, kainate 3 [Source:MGI Symbol;Acc:MGI:95816]		4	4.26293	6.26959e-05	0.23458	0.666667	8	FALSE	17.5	0	4	0	0.891236	28	0.564516	Glutamate receptor; ionotropic; kainate 3; Receptor for glutamate that functions as ligand-gated ion channel in the central nervous system and plays an important role in excitatory synaptic transmission. L-glutamate acts as an excitatory neurotransmitter at many synapses in the central nervous system. The postsynaptic actions of Glu are mediated by a variety of receptors that are named according …	0.169825	Grik3
Mrto4	-	X	-	-	-	-	-	0	add.P	4.4e-16	14576513	3	RNA : SV22 | RNA : SV22 | RNA : SV3 | RNA : SV97 | RNA : SV97 | RNA : SV97	0	NA	4	139347435	139352576	ENSMUSG00000028741	mRNA tur-ver 4, ribosome maturation factor [Source:MGI Symbol;Acc:MGI:1917152]		7	4.50862	0.0173343	0.221797	0.52381	8	FALSE	8.71429	0	7	0	0.883046	4716	0.372671	MRT4; mRNA turnover 4; homolog (S. cerevisiae); Component of the ribosome assembly machinery. Nuclear paralog of the ribosomal protein P0; it binds pre-60S subunits at an early stage of assembly in the nucleolus; and is replaced by P0 in cytoplasmic pre-60S subunits and mature 80S ribosomes.	1.23072	Mrto4
Arhgef10l	X	X	-	-	-	-	-	0	add.P	4.4e-16	12008129	3	RNA : SV22 | RNA : SV22 | RNA : SV3 | RNA : SV3 | RNA : SV97 | RNA : SV97 | RNA : SV97	1	RNA: SV3	4	140514485	140666012	ENSMUSG00000040964	Rho guanine nucleotide exchange factor (GEF) 10-like [Source:MGI Symbol;Acc:MGI:1920004]		0	0	0	0	0	0	TRUE	0	0	0	0	Infinity	0	0	Rho guanine nucleotide exchange factor 10-like protein; Acts as guanine nucleotide exchange factor (GEF) for RHOA; RHOB and RHOC.	1.88143	Arhgef10l
Casz1	-	-	-	-	-	-	-	0	add.P	1.8e-15	5866901	5	DNA : SV102 | DNA : SV102 | DNA : SV102 | DNA : SV38 | DNA : SV47 | DNA : SV50 | RNA : SV3 | RNA : SV3	0	NA	4	148804429	148954889	ENSMUSG00000028977	castor zinc finger 1 [Source:MGI Symbol;Acc:MGI:1196251]		2	3.94828	0.0035061	0.253275	0	7	FALSE	9.5	0	2	0	0.901724	800	0.5	Zinc finger protein castor homolog 1; Transcription factor involved in vascular assembly and morphogenesis through direct transcriptional regulation of EGFL7.	2.38298	Casz1
Pex14	-	-	-	-	-	-	-	0	add.P	1.8e-15	5866901	5	DNA : SV102 | DNA : SV102 | DNA : SV102 | DNA : SV38 | DNA : SV47 | DNA : SV50 | RNA : SV3 | RNA : SV3	0	NA	4	148960535	149099876	ENSMUSG00000028975	peroxisomal biogenesis factor 14 [Source:MGI Symbol;Acc:MGI:1927868]		2	5.0431	0	0.198291	1	8	FALSE	5	0	2	0	0.86523	0	0.625	Peroxisomal membrane anchor protein PEX14; Peroxisome membrane protein that is an essential component of the peroxisomal import machinery. Functions as a docking factor for the predominantly cytoplasmic PTS1 receptor (PEX5). Plays a key role for peroxisome movement through a direct interaction with tubulin.	1.71048	Pex14
Dffa	-	-	-	-	-	-	-	0	add.P	1.8e-15	5866901	5	DNA : SV102 | DNA : SV102 | DNA : SV102 | DNA : SV38 | DNA : SV47 | DNA : SV50 | RNA : SV3 | RNA : SV3	0	NA	4	149104146	149120647	ENSMUSG00000028974	DNA fragmentation factor, alpha subunit [Source:MGI Symbol;Acc:MGI:1196227]		0	0	0	0	0	0	TRUE	0	0	0	0	Infinity	0	0	DNA fragmentation factor 45 kDa subunit; Inhibitor of the caspase-activated DNase (DFF40).	2.65203	Dffa
Cort	-	-	-	-	-	-	-	0	add.P	1.8e-15	5866901	5	DNA : SV102 | DNA : SV102 | DNA : SV102 | DNA : SV38 | DNA : SV47 | DNA : SV50 | RNA : SV3 | RNA : SV3	0	NA	4	149125034	149126763	ENSMUSG00000028971	cortistatin [Source:MGI Symbol;Acc:MGI:109538]		12	3.67672	0.0104911	0.271981	0.727273	8	FALSE	15.1667	0	12	0	0.910776	2960	0.269345	Cortistatin	1.14823	Cort
Cenps	-	-	-	-	-	-	-	0	add.P	1.8e-15	5866901	5	DNA : SV102 | DNA : SV102 | DNA : SV102 | DNA : SV38 | DNA : SV47 | DNA : SV50 | RNA : SV3 | RNA : SV3	0	NA	4	149127121	149137629	ENSMUSG00000073705	centromere protein S [Source:MGI Symbol;Acc:MGI:1917178]
Pgd	-	-	-	-	-	-	-	0	add.P	1.8e-15	5866901	5	DNA : SV102 | DNA : SV102 | DNA : SV102 | DNA : SV38 | DNA : SV47 | DNA : SV50 | RNA : SV3 | RNA : SV3	0	NA	4	149149991	149166771	ENSMUSG00000028961	phosphogluconate dehydrogenase [Source:MGI Symbol;Acc:MGI:97553]		5	3.82759	0.0154473	0.261261	0.4	7	FALSE	9.6	0	5	0	0.905747	4286	0.29375	6-phosphogluconate dehydrogenase; decarboxylating; Catalyzes the oxidative decarboxylation of 6- phosphogluconate to ribulose 5-phosphate and CO(2); with concomitant reduction of NADP to NADPH.	3.06593	Pgd
Kif1b	-	-	-	-	-	-	-	0	add.P	1.8e-15	5866901	5	DNA : SV102 | DNA : SV102 | DNA : SV102 | DNA : SV38 | DNA : SV47 | DNA : SV50 | RNA : SV3 | RNA : SV3	0	NA	4	149176319	149307693	ENSMUSG00000063077	kinesin family member 1B [Source:MGI Symbol;Acc:MGI:108426]		7	3.76724	0.0137413	0.265446	0.333333	7	FALSE	10.2857	0	7	0	0.907759	3554	0.289796	Kinesin-like protein KIF1B; Motor for anterograde transport of mitochondria. Has a microtubule plus end-directed motility.	2.37637	Kif1b
Ube4b	-	-	-	-	-	-	-	0	add.P	1.8e-15	5866901	5	DNA : SV102 | DNA : SV102 | DNA : SV102 | DNA : SV38 | DNA : SV47 | DNA : SV50 | RNA : SV3 | RNA : SV3	0	NA	4	149328416	149426749	ENSMUSG00000028960	ubiquitination factor E4B [Source:MGI Symbol;Acc:MGI:1927086]		13	3.4181	0.0716103	0.29256	0.384615	6	FALSE	10.7692	0	13	0	0.919397	17814	0.23951	RING-type E3 ubiquitin transferase E4 B; Ubiquitin-protein ligase that probably functions as an E3 ligase in conjunction with specific E1 and E2 ligases. May also function as an E4 ligase mediating the assembly of polyubiquitin chains on substrates ubiquitinated by another E3 ubiquitin ligase.	2.45375	Ube4b
Rbp7	-	-	-	-	-	-	-	0	add.P	1.8e-15	5866901	5	DNA : SV102 | DNA : SV102 | DNA : SV102 | DNA : SV38 | DNA : SV47 | DNA : SV50 | RNA : SV3 | RNA : SV3	0	NA	4	149449687	149454978	ENSMUSG00000028996	reti-l binding protein 7, cellular [Source:MGI Symbol;Acc:MGI:1890409]		9	3.97845	0.00137639	0.251354	0.861111	7	FALSE	12.7778	0	9	0	0.900718	858	0.473251	Cellular retinoic acid-binding protein IV; Intracellular transport of retinol; Belongs to the calycin superfamily. Fatty-acid binding protein (FABP) family.	2.18674	Rbp7
Nmnat1	-	-	-	-	-	-	-	0	add.P	1.8e-15	5866901	5	DNA : SV102 | DNA : SV102 | DNA : SV102 | DNA : SV38 | DNA : SV47 | DNA : SV50 | RNA : SV3 | RNA : SV3	0	NA	4	149467572	149485202	ENSMUSG00000028992	nicotinamide nucleotide adenylyltransferase 1 [Source:MGI Symbol;Acc:MGI:1913704]		10	3.95259	0.000886029	0.252999	0.822222	7	FALSE	12.7	0	10	0	0.90158	430	0.453571	Nicotinamide/nicotinic acid mononucleotide adenylyltransferase 1; Catalyzes the formation of NAD(+) from nicotinamide mononucleotide (NMN) and ATP. Can also use the deamidated form; nicotinic acid mononucleotide (NaMN) as substrate with the same efficiency (By similarity). Can use triazofurin monophosphate (TrMP) as substrate (By similarity). Also catalyzes the reverse reaction; i.e. the pyrophos…	2.05063	Nmnat1
Tmem274	-	-	-	-	-	-	-	0	add.P	1.8e-15	5866901	5	DNA : SV102 | DNA : SV102 | DNA : SV102 | DNA : SV38 | DNA : SV47 | DNA : SV50 | RNA : SV3 | RNA : SV3	0	NA	4	149477378	149483549	ENSMUSG00000087198	transmembrame protein 274 [Source:MGI Symbol;Acc:MGI:3701129]
Lzic	-	-	-	-	-	-	-	0	add.P	1.8e-15	5866901	5	DNA : SV102 | DNA : SV102 | DNA : SV102 | DNA : SV38 | DNA : SV47 | DNA : SV50 | RNA : SV3 | RNA : SV3	0	NA	4	149485229	149496668	ENSMUSG00000028990	leucine zipper and CTNNBIP1 domain containing [Source:MGI Symbol;Acc:MGI:1916401]		12	3.7931	0.00661615	0.263636	0.666667	7	FALSE	12	0	12	0	0.906897	2558	0.363636	Leucine zipper and ICAT homologous domain-containing protein; Leucine zipper and CTNNBIP1 domain containing	1.69723	Lzic
Ctnnbip1	-	-	-	-	-	-	-	0	add.P	1.8e-15	5866901	5	DNA : SV102 | DNA : SV102 | DNA : SV102 | DNA : SV38 | DNA : SV47 | DNA : SV50 | RNA : SV3 | RNA : SV3	0	NA	4	149518236	149566437	ENSMUSG00000028988	catenin beta interacting protein 1 [Source:MGI Symbol;Acc:MGI:1915756]		6	4.51293	0.00805381	0.221585	0.666667	8	FALSE	11.8333	0	6	0	0.882902	3348	0.555556	Inhibitor of beta-catenin and Tcf-4; Prevents the interaction between CTNNB1 and TCF family members; and acts as negative regulator of the Wnt signaling pathway; Belongs to the CTNNBIP1 family.	2.31074	Ctnnbip1
Clstn1	-	-	-	-	-	-	-	0	add.P	1.8e-15	5866901	5	DNA : SV102 | DNA : SV102 | DNA : SV102 | DNA : SV38 | DNA : SV47 | DNA : SV50 | RNA : SV3 | RNA : SV3	0	NA	4	149586468	149648899	ENSMUSG00000039953	calsyntenin 1 [Source:MGI Symbol;Acc:MGI:1929895]		2	4.76724	0	0.209765	1	8	FALSE	13	0	2	0	0.874425	0	0.928571	Alcadein-alpha; Induces KLC1 association with vesicles and functions as a cargo in axonal anterograde transport. Complex formation with APBA2 and APP; stabilizes APP metabolism and enhances APBA2- mediated suppression of beta-APP40 secretion; due to the retardation of intracellular APP maturation. In complex with APBA2 and C99; a C-terminal APP fragment; abolishes C99 interaction with PSEN1 and t…	2.59084	Clstn1
Pik3cd	-	-	-	-	-	-	-	0	add.P	1.8e-15	5866901	5	DNA : SV102 | DNA : SV102 | DNA : SV102 | DNA : SV38 | DNA : SV47 | DNA : SV50 | RNA : SV3 | RNA : SV3	0	NA	4	149649168	149702571	ENSMUSG00000039936	phosphatidyli-sitol-4,5-bisphosphate 3-kinase catalytic subunit delta [Source:MGI Symbol;Acc:MGI:1098211]		4	4.125	0.000553433	0.242424	0.5	8	FALSE	16.5	0	4	0	0.895833	168	0.464286	Phosphatidylinositol 4;5-bisphosphate 3-kinase 110 kDa catalytic subunit delta; Phosphoinositide-3-kinase (PI3K) that phosphorylates PftdIns(4;5)P2 (Phosphatidylinositol 4;5-bisphosphate) to generate phosphatidylinositol 3;4;5-trisphosphate (PIP3). PIP3 plays a key role by recruiting PH domain-containing proteins to the membrane; including AKT1 and PDPK1; activating signaling cascades involved in…	2.58052	Pik3cd
Tmem201	-	-	-	-	-	-	-	0	add.P	1.8e-15	5866901	5	DNA : SV102 | DNA : SV102 | DNA : SV102 | DNA : SV38 | DNA : SV47 | DNA : SV50 | RNA : SV3 | RNA : SV3	0	NA	4	149715375	149738044	ENSMUSG00000044700	transmembrane protein 201 [Source:MGI Symbol;Acc:MGI:1196277]		14	3.77586	0.00970297	0.26484	0.604396	7	FALSE	11.2143	0	14	0	0.907471	4106	0.329832	Spindle-associated membrane protein 1; Involved in nuclear movement during fibroblast polarization and migration. May recruit Ran GTPase to the nuclear periphery (By similarity).	3.33479	Tmem201
Slc25a33	-	-	-	-	-	-	-	0	add.P	1.8e-15	5866901	5	DNA : SV102 | DNA : SV102 | DNA : SV102 | DNA : SV38 | DNA : SV47 | DNA : SV50 | RNA : SV3 | RNA : SV3	0	NA	4	149744036	149774277	ENSMUSG00000028982	solute carrier family 25, member 33 [Source:MGI Symbol;Acc:MGI:1917806]		15	3.73276	0.0182031	0.267898	0.542857	7	FALSE	10.9333	0	15	0	0.908908	5660	0.301852	Solute carrier family 25; member 33; Mitochondrial transporter that imports/exports pyrimidine nucleotides into and from mitochondria. Transports preferentially uracil; thymine; and cytosine (deoxy)nucleoside di- and triphosphates by an antiport mechanism. Also transports guanine but not adenine (deoxy)nucleotides. Is inhibited strongly by pyridoxal 5'-phosphate; 4;7-diphenyl-1;10-phenanthroline;…	1.10212	Slc25a33
Spsb1	-	-	X	-	-	-	-	6	add.P	1.8e-15	5866901	5	DNA : SV102 | DNA : SV102 | DNA : SV102 | DNA : SV38 | DNA : SV47 | DNA : SV50 | RNA : SV3 | RNA : SV3	0	NA	4	149896283	149955043	ENSMUSG00000039911	splA/rya-dine receptor domain and SOCS box containing 1 [Source:MGI Symbol;Acc:MGI:1921896]		15	3.76293	0.0144889	0.26575	0.447619	7	FALSE	10.4	0	15	0	0.907902	4516	0.281081	splA/ryanodine receptor domain and SOCS box containing 1; Probable substrate recognition component of a SCF-like ECS (Elongin BC-CUL2/5-SOCS-box protein) E3 ubiquitin-protein ligase complex which mediates the ubiquitination and subsequent proteasomal degradation of target proteins.	1.22573	Spsb1
H6pd	-	-	X	-	-	-	-	6	add.P	1.8e-15	5866901	5	DNA : SV102 | DNA : SV102 | DNA : SV102 | DNA : SV38 | DNA : SV47 | DNA : SV50 | RNA : SV3 | RNA : SV3	0	NA	4	149979475	150009023	ENSMUSG00000028980	hexose-6-phosphate dehydrogenase (glucose 1-dehydrogenase) [Source:MGI Symbol;Acc:MGI:2140356]		16	3.62069	0.0602681	0.27619	0.333333	7	FALSE	10.5	0	16	0	0.912644	16834	0.203431	Hexose-6-phosphate dehydrogenase (glucose 1-dehydrogenase); Oxidizes glucose-6-phosphate and glucose; as well as other hexose-6-phosphates; In the C-terminal section; belongs to the glucosamine/galactosamine-6-phosphate isomerase family. 6- phosphogluconolactonase subfamily.	2.30019	H6pd
Gpr157	-	-	X	-	-	-	-	6	add.P	1.8e-15	5866901	5	DNA : SV102 | DNA : SV102 | DNA : SV102 | DNA : SV38 | DNA : SV47 | DNA : SV50 | RNA : SV3 | RNA : SV3	0	NA	4	150087365	150105927	ENSMUSG00000047875	G protein-coupled receptor 157 [Source:MGI Symbol;Acc:MGI:2442046]		15	3.69828	0.0140251	0.270396	0.561905	7	FALSE	10.9333	0	15	0	0.910057	5742	0.303704	G protein-coupled receptor 157; Orphan receptor that promotes neuronal differentiation of radial glial progenitors (RGPs). The activity of this receptor is mediated by a G(q)-protein that activates a phosphatidylinositol-calcium second messenger; Belongs to the G-protein coupled receptor 2 family.	0.335534	Gpr157
Slc2a5	-	-	X	-	-	-	-	6	add.P	1.8e-15	5866901	5	DNA : SV102 | DNA : SV102 | DNA : SV102 | DNA : SV38 | DNA : SV47 | DNA : SV50 | RNA : SV3 | RNA : SV3	0	NA	4	150119283	150144169	ENSMUSG00000028976	solute carrier family 2 (facilitated glucose transporter), member 5 [Source:MGI Symbol;Acc:MGI:1928369]		7	4.12931	0.0107162	0.242171	0.571429	8	FALSE	12.4286	0	7	0	0.89569	3874	0.396313	Solute carrier family 2 (facilitated glucose transporter); member 5; Functions as a fructose transporter that has only low activity with other monosaccharides. Can mediate the uptake of deoxyglucose; but with low efficiency (By similarity). Essential for fructose uptake in the small intestine. Plays a role in the regulation of salt uptake and blood pressure in response to dietary fructose. Requir…	3.69223	Slc2a5
Slc2a7	-	-	X	-	-	-	-	6	add.P	1.8e-15	5866901	5	DNA : SV102 | DNA : SV102 | DNA : SV102 | DNA : SV38 | DNA : SV47 | DNA : SV50 | RNA : SV3 | RNA : SV3	0	NA	4	150148972	150168482	ENSMUSG00000062064	solute carrier family 2 (facilitated glucose transporter), member 7 [Source:MGI Symbol;Acc:MGI:3650865]		4	4.06466	0.00698553	0.246023	0.5	7	FALSE	11.5	0	4	0	0.897845	1510	0.45	Solute carrier family 2 (facilitated glucose transporter); member 7	2.1371	Slc2a7
Car6	-	-	X	-	-	-	-	6	add.P	1.8e-15	5866901	5	DNA : SV102 | DNA : SV102 | DNA : SV102 | DNA : SV38 | DNA : SV47 | DNA : SV50 | RNA : SV3 | RNA : SV3	0	NA	4	150187015	150201332	ENSMUSG00000028972	carbonic anhydrase 6 [Source:MGI Symbol;Acc:MGI:1333786]		12	3.71121	0.0244042	0.269454	0.454545	7	FALSE	10.9167	0	12	0	0.909626	6240	0.285088	Salivary carbonic anhydrase; Reversible hydration of carbon dioxide. Its role in saliva is unknown.	1.4914	Car6
E-1	-	-	X	-	-	-	-	6	add.P	1.8e-15	5866901	5	DNA : SV102 | DNA : SV102 | DNA : SV102 | DNA : SV38 | DNA : SV47 | DNA : SV50 | RNA : SV3 | RNA : SV3	0	NA	4	150236721	150248879	ENSMUSG00000063524	e-lase 1, alpha -n-neuron [Source:MGI Symbol;Acc:MGI:95393]
Rere	X	-	X	-	-	-	-	6	add.P	1.8e-15	5866901	5	DNA : SV102 | DNA : SV102 | DNA : SV102 | DNA : SV38 | DNA : SV47 | DNA : SV50 | RNA : SV3 | RNA : SV3	1	RNA: SV3	4	150281646	150621966	ENSMUSG00000039852	arginine glutamic acid dipeptide (RE) repeats [Source:MGI Symbol;Acc:MGI:2683486]		12	3.59052	0.0446086	0.278511	0.621212	7	FALSE	12.1667	0	12	0	0.913649	13938	0.320175	Arginine-glutamic acid dipeptide repeats protein; Plays a role as a transcriptional repressor during development. May play a role in the control of cell survival.	2.36877	Rere
Slc45a1	-	-	X	-	-	-	-	6	add.P	1.8e-15	5866901	5	DNA : SV102 | DNA : SV102 | DNA : SV102 | DNA : SV38 | DNA : SV47 | DNA : SV50 | RNA : SV3 | RNA : SV3	0	NA	4	150628572	150652174	ENSMUSG00000039838	solute carrier family 45, member 1 [Source:MGI Symbol;Acc:MGI:2653235]		15	3.72845	0.0110981	0.268208	0.571429	7	FALSE	11	0	15	0	0.909052	4776	0.305556	Deleted in neuroblastoma 5 protein homolog; Proton-associated glucose transporter in the brain.	0.031781	Slc45a1
Errfi1	-	-	X	-	-	-	-	6	add.P	1.8e-15	5866901	5	DNA : SV102 | DNA : SV102 | DNA : SV102 | DNA : SV38 | DNA : SV47 | DNA : SV50 | RNA : SV3 | RNA : SV3	0	NA	4	150853919	150868892	ENSMUSG00000028967	ERBB receptor feedback inhibitor 1 [Source:MGI Symbol;Acc:MGI:1921405]		5	4.52155	0	0.221163	1	8	FALSE	14.2	0	5	0	0.882615	0	0.67619	Mitogen-inducible gene 6 protein homolog; Negative regulator of EGFR signaling in skin morphogenesis. Acts as a negative regulator for several EGFR family members; including ERBB2; ERBB3 and ERBB4. Inhibits EGFR catalytic activity by interfering with its dimerization. Inhibits autophosphorylation of EGFR; ERBB2 and ERBB4. Important for normal keratinocyte proliferation and differentiation. Plays …	2.72996	Errfi1
Park7	-	-	X	-	-	-	-	6	add.P	1.8e-15	5866901	5	DNA : SV102 | DNA : SV102 | DNA : SV102 | DNA : SV38 | DNA : SV47 | DNA : SV50 | RNA : SV3 | RNA : SV3	0	NA	4	150897133	150914437	ENSMUSG00000028964	Parkinson disease (autosomal recessive, early onset) 7 [Source:MGI Symbol;Acc:MGI:2135637]		6	3.9181	0.0339371	0.255226	0.133333	7	FALSE	6.5	0	6	0	0.90273	8494	0.222222	Parkinson disease (autosomal recessive; early onset) 7; Protein and nucleotide deglycase that catalyzes the deglycation of the Maillard adducts formed between amino groups of proteins or nucleotides and reactive carbonyl groups of glyoxals. Thus; functions as a protein deglycase that repairs methylglyoxal- and glyoxal-glycated proteins; and releases repaired proteins and lactate or glycolate; res…	3.08082	Park7
Tnfrsf9	-	-	X	-	-	-	-	6	add.P	1.8e-15	5866901	5	DNA : SV102 | DNA : SV102 | DNA : SV102 | DNA : SV38 | DNA : SV47 | DNA : SV50 | RNA : SV3 | RNA : SV3	0	NA	4	150914562	150946102	ENSMUSG00000028965	tumor necrosis factor receptor superfamily, member 9 [Source:MGI Symbol;Acc:MGI:1101059]		0	0	0	0	0	0	TRUE	0	0	0	0	Infinity	0	0	Tumor necrosis factor receptor superfamily; member 9; Receptor for TNFSF9/4-1BBL. Possibly active during T cell activation.	2.52765	Tnfrsf9
Cdk14	X	-	X	-	-	-	-	1	add.P	1.67e-17	13337	3	DNA : SV102 | DNA : SV50 | RNA : SV49 | RNA : SV49 | RNA : SV49	3	DNA: SV102 | SV50 | RNA: SV49	5	4803391	5420312	ENSMUSG00000028926	cyclin-dependent kinase 14 [Source:MGI Symbol;Acc:MGI:894318]		2	4.36638	0.00184924	0.229023	0	7	FALSE	5.5	0	2	0	0.887787	224	0.5	Serine/threonine-protein kinase PFTAIRE-1; Serine/threonine-protein kinase involved in the control of the eukaryotic cell cycle; whose activity is controlled by an associated cyclin. Acts as a cell-cycle regulator of Wnt signaling pathway during G2/M phase by mediating the phosphorylation of LRP6 at 'Ser-1490'; leading to the activation of the Wnt signaling pathway. Acts as a regulator of cell cy…	1.37189	Cdk14
Gpat3	-	-	X	-	-	-	-	9	dom.P	9.54e-09	5838656	1	RNA : G_Acetatifactor	0	NA	5	100845713	100899102	ENSMUSG00000029314	glycerol-3-phosphate acyltransferase 3 [Source:MGI Symbol;Acc:MGI:3603816]		3	5.47845	0.0110789	0.182533	0	9	FALSE	2	0	3	0	0.850718	2832	0.333333	1-acyl-sn-glycerol-3-phosphate O-acyltransferase 9; May transfer the acyl-group from acyl-coA to the sn-1 position of glycerol-3-phosphate; an essential step in glycerolipid biosynthesis. Also transfers the acyl-group from acyl-coA to the sn-2 position of 1-acyl-sn-glycerol-3-phosphate (lysophosphatidic acid; or LPA); forming 1;2-diacyl-sn-glycerol-3- phosphate (phosphatidic acid; or PA).	2.77533	Gpat3
Nkx6-1	-	-	X	-	-	-	-	9	dom.P	9.54e-09	5838656	1	RNA : G_Acetatifactor	0	NA	5	101658139	101664996	ENSMUSG00000035187	NK6 homeobox 1 [Source:MGI Symbol;Acc:MGI:1206039]		3	4.49138	0.0257128	0.222649	0	8	FALSE	3.66667	0	3	0	0.883621	4168	0.333333	Homeobox protein NK-6 homolog A; Transcription factor which binds to specific A/T-rich DNA sequences in the promoter regions of a number of genes. Involved in transcriptional regulation in islet beta cells. Binds to the insulin promoter and is involved in regulation of the insulin gene. Together with NKX2-2 and IRX3 acts to restrict the generation of motor neurons to the appropriate region of the…	2.40766	Nkx6-1
Cds1	-	-	X	-	-	-	-	9	add.P	5.42e-11	5838656	4	DNA : F_Prevotellaceae | DNA : G_Paraprevotella | DNA : SV7 | RNA : G_Acetatifactor	0	NA	5	101765130	101823858	ENSMUSG00000029330	CDP-diacylglycerol synthase 1 [Source:MGI Symbol;Acc:MGI:1921846]		1	6.47414	0	0.154461	0	10	FALSE	3	0	1	0	0.817529	0	0	CTP:phosphatidate cytidylyltransferase 1; Provides CDP-diacylglycerol; an important precursor for the synthesis of phosphatidylinositol (PtdIns); phosphatidylglycerol; and cardiolipin. Overexpression may amplify cellular signaling responses from cytokines. May also play an important role in the signal transduction mechanism of retina and neural cells (By similarity); Belongs to the CDS family.	2.64793	Cds1
Wdfy3	-	-	X	-	-	-	-	9	add.P	5.42e-11	5838656	4	DNA : F_Prevotellaceae | DNA : G_Paraprevotella | DNA : SV7 | RNA : G_Acetatifactor	0	NA	5	101832956	102069921	ENSMUSG00000043940	WD repeat and FYVE domain containing 3 [Source:MGI Symbol;Acc:MGI:1096875]		2	4.97414	0.00626512	0.20104	0	9	FALSE	4	0	2	0	0.867529	1012	0.5	Beach domain; WD repeat and FYVE domain-containing protein 1; Required for selective macroautophagy (aggrephagy). Acts as an adapter protein by linking specific proteins destined for degradation to the core autophagic machinery members; such as the ATG5-ATG12-ATG16L E3-like ligase; SQSTM1 and LC3. Involved in the formation and autophagic degradation of cytoplasmic ubiquitin- containing inclusions…	1.97703	Wdfy3
Arhgap24	X	-	X	-	-	-	-	6	add.P	5.42e-11	5838656	4	DNA : F_Prevotellaceae | DNA : G_Paraprevotella | DNA : SV7 | RNA : G_Acetatifactor	1	RNA: G_Acetatifactor	5	102481391	102897937	ENSMUSG00000057315	Rho GTPase activating protein 24 [Source:MGI Symbol;Acc:MGI:1922647]		2	5.88362	0.000251903	0.169963	0	10	FALSE	2.5	0	2	0	0.837213	24	0.5	Rho-type GTPase-activating protein 24; Rho GTPase-activating protein involved in cell polarity; cell morphology and cytoskeletal organization. Acts as a GTPase activator for the Rac-type GTPase by converting it to an inactive GDP-bound state. Controls actin remodeling by inactivating Rac downstream of Rho leading to suppress leading edge protrusion and promotes cell retraction to achieve cellular…	1.28968	Arhgap24
Sparcl1	-	X	X	-	-	-	X	4	add.P	5.42e-11	5838656	4	DNA : F_Prevotellaceae | DNA : G_Paraprevotella | DNA : SV7 | RNA : G_Acetatifactor	0	NA	5	104079111	104113733	ENSMUSG00000029309	SPARC-like 1 [Source:MGI Symbol;Acc:MGI:108110]		8	4	0	0.25	1	8	FALSE	12.125	0	8	0	0.9	0	0.336806	Extracellular matrix protein 2; SPARC-like 1; Belongs to the SPARC family.	2.86946	Sparcl1
Tgfbr3	X	-	-	-	-	-	-	0	add.P	5.42e-11	1055395	4	DNA : F_Prevotellaceae | DNA : F_Prevotellaceae | DNA : F_Prevotellaceae | DNA : G_Paraprevotella | DNA : G_Paraprevotella | DNA : G_Paraprevotella | DNA : SV29 | DNA : SV7 | DNA : SV7 | DNA : SV7	4	DNA: F_Prevotellaceae | G_Paraprevotella | SV7 | SV29	5	107106570	107289629	ENSMUSG00000029287	transforming growth factor, beta receptor III [Source:MGI Symbol;Acc:MGI:104637]		1	4.51724	0	0.221374	0	8	FALSE	8	0	1	0	0.882759	0	0	Transforming growth factor beta receptor type 3; Binds to TGF-beta. Could be involved in capturing and retaining TGF-beta for presentation to the signaling receptors (By similarity).	2.38496	Tgfbr3
Brdt	X	-	-	-	-	-	-	0	add.P	5.42e-11	1055395	4	DNA : F_Prevotellaceae | DNA : F_Prevotellaceae | DNA : F_Prevotellaceae | DNA : G_Paraprevotella | DNA : G_Paraprevotella | DNA : G_Paraprevotella | DNA : SV29 | DNA : SV7 | DNA : SV7 | DNA : SV7	4	DNA: SV7 | F_Prevotellaceae | G_Paraprevotella | SV29	5	107331159	107387058	ENSMUSG00000029279	bromodomain, testis-specific [Source:MGI Symbol;Acc:MGI:1891374]		1	4.98276	0	0.200692	0	9	FALSE	6	0	1	0	0.867241	0	0	Bromodomain-containing female sterile homeotic-like protein; Testis-specific chromatin protein that specifically binds histone H4 acetylated at 'Lys-5' and 'Lys-8' (H4K5ac and H4K8ac; respectively) and plays a key role in spermatogenesis. Required in late pachytene spermatocytes: plays a role in meiotic and post-meiotic cells by binding to acetylated histones at the promoter of specific meiotic a…	1.5827	Brdt
Mtf2	X	-	X	-	-	-	-	2	add.P	5.42e-11	1055395	4	DNA : F_Prevotellaceae | DNA : F_Prevotellaceae | DNA : F_Prevotellaceae | DNA : G_Paraprevotella | DNA : G_Paraprevotella | DNA : G_Paraprevotella | DNA : SV29 | DNA : SV7 | DNA : SV7 | DNA : SV7	4	DNA: G_Paraprevotella | SV7 | F_Prevotellaceae | SV29	5	108065674	108109004	ENSMUSG00000029267	metal response element binding transcription factor 2 [Source:MGI Symbol;Acc:MGI:105050]		1	5.38793	0	0.1856	0	9	FALSE	6	0	1	0	0.853736	0	0	Metal response element binding transcription factor 2; Polycomb group (PcG) that specifically binds histone H3 trimethylated at 'Lys-36' (H3K36me3) and recruits the PRC2 complex. Acts by binding to H3K36me3; a mark for transcriptional activation; and recruiting the PRC2 complex; leading to enhance PRC2 H3K27me3 methylation activity. Regulates the transcriptional networks during embryonic stem cel…	1.98804	Mtf2
Rplp0	-	X	-	-	-	-	-	0	dom.P	1.41e-16	NA	0	NA	0	NA	5	115559467	115563727	ENSMUSG00000067274	ribosomal protein, large, P0 [Source:MGI Symbol;Acc:MGI:1927636]		6	4.25	0.0218982	0.235294	0.666667	8	FALSE	9.83333	0	6	0	0.891667	5120	0.42029	60S acidic ribosomal protein P0; Ribosomal protein P0 is the functional equivalent of E.coli protein L10.	3.83897	Rplp0
Tbx3	-	-	X	-	-	-	-	7	dom.P	9.67e-10	3826801	1	DNA : SV19	0	NA	5	119670669	119684724	ENSMUSG00000018604	T-box 3 [Source:MGI Symbol;Acc:MGI:98495]		4	4.24138	0.0111183	0.235772	0.333333	7	FALSE	5.5	0	4	0	0.891954	1852	0.323529	T-box transcription factor TBX3; Transcriptional repressor involved in developmental processes. Probably plays a role in limb pattern formation. Acts as a negative regulator of PML function in cellular senescence (By similarity).	2.85793	Tbx3
Tbx5	X	-	X	-	-	-	-	7	dom.P	3.88e-10	3208162	1	DNA : SV19 | DNA : SV19 | DNA : SV19	2	DNA: SV19 | SV109	5	119832668	119885219	ENSMUSG00000018263	T-box 5 [Source:MGI Symbol;Acc:MGI:102541]		2	4.7931	0.000984191	0.208633	0	8	FALSE	4.5	0	2	0	0.873563	246	0.583333	T-box transcription factor TBX5; DNA-binding protein that regulates the transcription of several genes and is involved in heart development and limb pattern formation. Binds to the core DNA motif of NPPA promoter.	1.64444	Tbx5
Sh2b3	X	-	-	-	-	-	-	0	dom.P	1.22e-21	3011069	13	DNA : C_Deferribacteres | DNA : F_Deferribacteraceae | DNA : G_Mucispirillum | DNA : O_Deferribacterales | DNA : SV10 | DNA : SV10 | DNA : SV109 | DNA : SV109 | DNA : SV13 | DNA : SV13 | DNA : SV13 | DNA : SV19 | DNA : SV19 | DNA : SV19 | DNA : SV6 | DNA : SV6 | DNA : SV6 | DNA : P_Deferribacteres | RNA : SV169 | RNA : SV169 | RNA : SV169 | RNA : SV26 | RNA : SV26 | RNA : SV26 | RNA : SV88 | RNA …	8	DNA: SV13 | SV6 | SV10 | P_Deferribacteres | C_Deferribacteres | O_Deferribacterales | F_Deferribacteraceae | G_Mucispirillum	5	121815488	121837646	ENSMUSG00000042594	SH2B adaptor protein 3 [Source:MGI Symbol;Acc:MGI:893598]		0	0	0	0	0	0	TRUE	0	0	0	0	Infinity	0	0	Lymphocyte-specific adapter protein Lnk; Links T-cell receptor activation signal to phospholipase C-gamma-1; GRB2 and phosphatidylinositol 3-kinase.	2.32523	Sh2b3
Aacs	X	X	X	-	-	-	-	2	dom.P	8.12e-16	3779751	8	DNA : C_Deferribacteres | DNA : F_Deferribacteraceae | DNA : G_Mucispirillum | DNA : O_Deferribacterales | DNA : SV10 | DNA : SV10 | DNA : SV13 | DNA : SV13 | DNA : SV13 | DNA : SV6 | DNA : SV6 | DNA : SV6 | DNA : P_Deferribacteres	3	DNA: SV6 | SV13 | SV10	5	125475814	125517410	ENSMUSG00000029482	acetoacetyl-CoA synthetase [Source:MGI Symbol;Acc:MGI:1926144]		1	5.375	0	0.186047	0	9	FALSE	3	0	1	0	0.854167	0	0	Acetoacetyl-CoA synthetase; Activates acetoacetate to acetoacetyl-CoA. May be involved in utilizing ketone body for the fatty acid-synthesis during adipose tissue development (By similarity).	3.08764	Aacs
Nipsnap2	-	X	X	-	-	-	-	2	add.P	5.84e-09	9565920	1	RNA : SV35	0	NA	5	129725063	129758327	ENSMUSG00000029432	nipsnap homolog 2 [Source:MGI Symbol;Acc:MGI:1278343]		0	0	0	0	0	0	TRUE	0	0	0	0	Infinity	0	0	Glioblastoma amplified sequence; May act as a positive regulator of L-type calcium channels.	2.02319	Nipsnap2
Hspb1	-	X	-	-	-	-	X	0	add.P	5.84e-09	9565920	1	RNA : SV35	0	NA	5	135887919	135889563	ENSMUSG00000004951	heat shock protein 1 [Source:MGI Symbol;Acc:MGI:96240]
Sdk1	-	-	X	-	-	-	-	6	add.P	2.69e-16	3941249	2	DNA : G_Marvinbryantia | RNA : SV264 | RNA : SV264 | RNA : SV264	0	NA	5	141241490	142215586	ENSMUSG00000039683	sidekick cell adhesion molecule 1 [Source:MGI Symbol;Acc:MGI:2444413]		0	0	0	0	0	0	TRUE	0	0	0	0	Infinity	0	0	Sidekick homolog 1 (chicken); Adhesion molecule that promotes lamina-specific synaptic connections in the retina. Expressed in specific subsets of interneurons and retinal ganglion cells (RGCs) and promotes synaptic connectivity via homophilic interactions; Belongs to the sidekick family.	0.492601	Sdk1
Mtus2	X	-	X	-	-	-	-	3	add.P	5.44e-10	77163	3	DNA : G_Marvinbryantia | DNA : SV109 | DNA : SV19	2	DNA: SV109 | SV19	5	147957320	148316065	ENSMUSG00000029651	microtubule associated tumor suppressor candidate 2 [Source:MGI Symbol;Acc:MGI:1915388]		0	0	0	0	0	0	TRUE	0	0	0	0	Infinity	0	0	Microtubule-associated tumor suppressor candidate 2 homolog; Binds microtubules. Together with MAPRE1 may target the microtubule depolymerase KIF2C to the plus-end of microtubules. May regulate the dynamics of microtubules at their growing distal tip (By similarity).	0.747738	Mtus2
Slc7a1	X	-	X	-	-	-	-	3	add.P	6.5e-11	17399	3	DNA : G_Marvinbryantia | DNA : SV109 | RNA : SV115	2	DNA: G_Marvinbryantia | RNA: SV115	5	148327410	148399904	ENSMUSG00000041313	solute carrier family 7 (cationic ami- acid transporter, y+ system), member 1 [Source:MGI Symbol;Acc:MGI:88117]		1	5.86638	0	0.170463	0	10	FALSE	3	0	1	0	0.837787	0	0	Solute carrier family 7 (cationic amino acid transporter; y+ system); member 1; High-affinity; low capacity permease involved in the transport of the cationic amino acids (arginine; lysine and ornithine) in non-hepatic tissues; Belongs to the amino acid-polyamine-organocation (APC) superfamily. Cationic amino acid transporter (CAT) (TC 2.A.3.3) family.	2.55415	Slc7a1
Grm8	X	-	-	-	X	-	-	0	add.P	4.16e-14	4428175	1	DNA : SV113 | DNA : SV113 | DNA : SV113	1	DNA: SV113 | DNA: SV113	6	27275119	28135178	ENSMUSG00000024211	glutamate receptor, metabotropic 8 [Source:MGI Symbol;Acc:MGI:1351345]		12	3.68103	0.0119124	0.271663	0.727273	8	FALSE	14.3333	0	12	0	0.910632	3416	0.265432	Glutamate receptor; metabotropic 8; G-protein coupled receptor for glutamate. Ligand binding causes a conformation change that triggers signaling via guanine nucleotide-binding proteins (G proteins) and modulates the activity of down-stream effectors. Signaling inhibits adenylate cyclase activity.	1.50593	Grm8
Gng12	X	-	-	X	-	-	-	0	dom.P	1.02e-14	24681	4	DNA : G_Roseburia | DNA : G_Roseburia | RNA : SV151 | RNA : SV151 | RNA : SV151 | RNA : SV40 | RNA : SV40 | RNA : SV40 | RNA : SV63 | RNA : SV63 | RNA : SV63	4	DNA: G_Roseburia | RNA: SV151 | SV63 | SV40	6	66896397	67021350	ENSMUSG00000036402	guanine nucleotide binding protein (G protein), gamma 12 [Source:MGI Symbol;Acc:MGI:1336171]		30	3.35345	0.107839	0.298201	0.271264	7	FALSE	10.6	0	30	0	0.921552	21146	0.153623	Guanine nucleotide-binding protein G(I)/G(S)/G(O) subunit gamma-12; Guanine nucleotide-binding proteins (G proteins) are involved as a modulator or transducer in various transmembrane signaling systems. The beta and gamma chains are required for the GTPase activity; for replacement of GDP by GTP; and for G protein- effector interaction.	2.03665	Gng12
Tpra1	X	-	X	-	-	-	-	1	add.P	1.11e-12	53593	3	DNA : SV119 | DNA : SV119 | DNA : SV64 | DNA : SV64 | DNA : SV64 | DNA : SV98 | DNA : SV98 | DNA : SV98	3	DNA: SV98 | SV64 | SV119	6	88902251	88912238	ENSMUSG00000002871	transmembrane protein, adipocyte asscociated 1 [Source:MGI Symbol;Acc:MGI:1345190]		3	3.91379	0.00944566	0.255507	0.333333	7	FALSE	12.6667	0	3	0	0.902874	3010	0.440476	Transmembrane domain protein of 40 kDa regulated in adipocytes; Transmembrane protein; adipocyte asscociated 1	2.46513	Tpra1
Iqsec1	X	-	X	-	-	-	-	3	add.P	7.06e-15	198483	8	DNA : G_Roseburia | DNA : G_Roseburia | RNA : SV151 | RNA : SV151 | RNA : SV151 | RNA : SV20 | RNA : SV20 | RNA : SV20 | RNA : SV376 | RNA : SV376 | RNA : SV376 | RNA : SV4 | RNA : SV4 | RNA : SV4 | RNA : SV40 | RNA : SV40 | RNA : SV40 | RNA : SV45 | RNA : SV45 | RNA : SV45 | RNA : SV63 | RNA : SV63 | RNA : SV63	4	DNA: G_Roseburia | RNA: SV151 | SV63 | SV40 | DNA: G_Roseburia | RNA: SV151 | SV63 | SV40	6	90656088	90988685	ENSMUSG00000034312	IQ motif and Sec7 domain 1 [Source:MGI Symbol;Acc:MGI:1196356]		0	0	0	0	0	0	TRUE	0	0	0	0	Infinity	0	0	IQ motif and SEC7 domain-containing protein 1; Guanine nucleotide exchange factor for ARF1 and ARF6. Guanine nucleotide exchange factor activity is enhanced by lipid binding. Accelerates GTP binding by ARFs of all three classes. Guanine nucleotide exchange protein for ARF6; mediating internalisation of beta-1 integrin.	1.94079	Iqsec1
Nup210	X	-	X	-	-	-	-	3	add.P	7.06e-15	198483	8	DNA : G_Roseburia | DNA : G_Roseburia | RNA : SV151 | RNA : SV151 | RNA : SV151 | RNA : SV20 | RNA : SV20 | RNA : SV20 | RNA : SV376 | RNA : SV376 | RNA : SV376 | RNA : SV4 | RNA : SV4 | RNA : SV4 | RNA : SV40 | RNA : SV40 | RNA : SV40 | RNA : SV45 | RNA : SV45 | RNA : SV45 | RNA : SV63 | RNA : SV63 | RNA : SV63	4	DNA: G_Roseburia | RNA: SV151 | SV63 | SV40 | DNA: G_Roseburia | RNA: SV151 | SV40 | SV63 | DNA: G_Roseburia | RNA: SV40 | SV151 | SV63 | DNA: G_Roseburia | RNA: SV40 | SV63 | SV151	6	91013068	91116829	ENSMUSG00000030091	nucleoporin 210 [Source:MGI Symbol;Acc:MGI:1859555]		1	5	0	0.2	0	9	FALSE	6	0	1	0	0.866667	0	0	Nuclear envelope pore membrane protein POM 210; Nucleoporin essential for nuclear pore assembly and fusion; nuclear pore spacing; as well as structural integrity; Belongs to the NUP210 family.	2.01096	Nup210
Foxp1	X	-	-	-	-	-	-	0	add.P	2.39e-23	418889	8	DNA : SV35 | DNA : SV35 | DNA : SV35 | RNA : C_Bacilli | RNA : C_Bacilli | RNA : F_Lactobacillaceae | RNA : F_Lactobacillaceae | RNA : G_Lactobacillus | RNA : G_Lactobacillus | RNA : O_Lactobacillales | RNA : O_Lactobacillales | RNA : SV181 | RNA : SV20 | RNA : SV20 | RNA : SV20 | RNA : SV31 | RNA : SV31 | RNA : SV31 | RNA : SV35 | RNA : SV35 | RNA : SV35	8	RNA: SV23 | RNA: SV23 | RNA: SV31 | SV20 | C_Bacilli | O_Lactobacillales | F_Lactobacillaceae | G_Lactobacillus | SV181	6	98925338	99522721	ENSMUSG00000030067	forkhead box P1 [Source:MGI Symbol;Acc:MGI:1914004]		2	5.73276	0.00862069	0.174436	0	10	FALSE	1.5	0	2	0	0.842241	1692	0.5	Forkhead-related transcription factor 1; Transcriptional repressor. Can act with CTBP1 to synergistically repress transcription but CTPBP1 is not essential. Plays an important role in the specification and differentiation of lung epithelium. Acts cooperatively with FOXP4 to regulate lung secretory epithelial cell fate and regeneration by restricting the goblet cell lineage program; the function m…	3.24099	Foxp1
Eif4e3	X	-	-	-	-	-	-	0	add.P	2.39e-23	418889	8	DNA : SV35 | DNA : SV35 | DNA : SV35 | RNA : C_Bacilli | RNA : C_Bacilli | RNA : F_Lactobacillaceae | RNA : F_Lactobacillaceae | RNA : G_Lactobacillus | RNA : G_Lactobacillus | RNA : O_Lactobacillales | RNA : O_Lactobacillales | RNA : SV181 | RNA : SV20 | RNA : SV20 | RNA : SV20 | RNA : SV31 | RNA : SV31 | RNA : SV31 | RNA : SV35 | RNA : SV35 | RNA : SV35	7	RNA: SV31 | SV20 | C_Bacilli | O_Lactobacillales | F_Lactobacillaceae | G_Lactobacillus | SV181	6	99625135	99666771	ENSMUSG00000093661	eukaryotic translation initiation factor 4E member 3 [Source:MGI Symbol;Acc:MGI:1914142]		2	4.74569	0.0171667	0.210718	0	9	FALSE	7	0	2	0	0.875144	3380	0.5	Eukaryotic translation initiation factor 4E member 3; Recognizes and binds the 7-methylguanosine-containing mRNA cap during an early step in the initiation of protein synthesis. May act as an inhibitor of EIF4E1 activity.	1.04667	Eif4e3
Prok2	X	-	-	X	-	-	-	0	add.P	2.39e-23	418889	8	DNA : SV35 | DNA : SV35 | DNA : SV35 | RNA : C_Bacilli | RNA : C_Bacilli | RNA : F_Lactobacillaceae | RNA : F_Lactobacillaceae | RNA : G_Lactobacillus | RNA : G_Lactobacillus | RNA : O_Lactobacillales | RNA : O_Lactobacillales | RNA : SV181 | RNA : SV20 | RNA : SV20 | RNA : SV20 | RNA : SV31 | RNA : SV31 | RNA : SV31 | RNA : SV35 | RNA : SV35 | RNA : SV35	7	RNA: SV20 | SV31 | O_Lactobacillales | C_Bacilli | F_Lactobacillaceae | G_Lactobacillus | SV181	6	99711299	99726392	ENSMUSG00000030069	prokineticin 2 [Source:MGI Symbol;Acc:MGI:1354178]		12	3.76724	0.0423129	0.265446	0.681818	8	FALSE	13.75	0	12	0	0.907759	9540	0.308712	Protein Bv8 homolog; May function as an output molecule from the suprachiasmatic nucleus (SCN) that transmits behavioral circadian rhythm. May also function locally within the SCN to synchronize output. Potently contracts gastrointestinal (GI) smooth muscle (By similarity); Belongs to the AVIT (prokineticin) family.	1.68413	Prok2
Itpr1	X	-	-	-	X	-	-	0	add.P	2.39e-23	11009106	2	DNA : SV35 | DNA : SV35 | DNA : SV35 | RNA : SV135 | RNA : SV135 | RNA : SV35 | RNA : SV35 | RNA : SV35	1	DNA: SV35 | RNA: SV35	6	108213096	108551109	ENSMUSG00000030102	i-sitol 1,4,5-trisphosphate receptor 1 [Source:MGI Symbol;Acc:MGI:96623]		6	3.63793	0.0614862	0.274882	0.133333	7	FALSE	11.8333	0	6	0	0.912069	13252	0.23	Inositol 1;4;5-trisphosphate-binding protein P400; Intracellular channel that mediates calcium release from the endoplasmic reticulum following stimulation by inositol 1;4;5- trisphosphate. Involved in the regulation of epithelial secretion of electrolytes and fluid through the interaction with AHCYL1. Plays a role in ER stress-induced apoptosis. Cytoplasmic calcium released from the ER triggers …	2.73511	Itpr1
Grm7	X	-	-	-	X	-	-	0	add.P	1.4e-12	27880596	1	RNA : SV135 | RNA : SV135	1	RNA: SV50	6	110645581	111567230	ENSMUSG00000056755	glutamate receptor, metabotropic 7 [Source:MGI Symbol;Acc:MGI:1351344]		12	3.68103	0.0119124	0.271663	0.727273	8	FALSE	14.3333	0	12	0	0.910632	3416	0.265432	Glutamate receptor; metabotropic 7; G-protein coupled receptor for glutamate. Ligand binding causes a conformation change that triggers signaling via guanine nucleotide-binding proteins (G proteins) and modulates the activity of down-stream effectors; such as adenylate cyclase. Signaling inhibits adenylate cyclase activity (By similarity).	1.09007	Grm7
Oxtr	X	-	-	X	-	-	-	0	add.P	4.4e-16	27880596	1	RNA : SV135 | RNA : SV135	1	RNA: SV135	6	112473683	112489943	ENSMUSG00000049112	oxytocin receptor [Source:MGI Symbol;Acc:MGI:109147]		12	4.03879	0.00921505	0.247599	0.727273	8	FALSE	13.6667	0	12	0	0.898707	2402	0.377315	Oxytocin receptor; Receptor for oxytocin. The activity of this receptor is mediated by G proteins which activate a phosphatidylinositol- calcium second messenger system.	1.53565	Oxtr
Cxcl12	X	-	-	-	X	-	-	0	add.P	1.18e-09	27880596	1	RNA : SV135 | RNA : SV135	1	RNA: SV135	6	117168535	117181367	ENSMUSG00000061353	chemokine (C-X-C motif) ligand 12 [Source:MGI Symbol;Acc:MGI:103556]		18	3.40948	0.0669238	0.2933	0.385621	7	FALSE	12.3889	0	18	0	0.919684	14650	0.189744	12-O-tetradecanoylphorbol 13-acetate repressed protein 1; Chemoattractant active on T-lymphocytes; monocytes; but not neutrophils. Activates the C-X-C chemokine receptor CXCR4 to induce a rapid and transient rise in the level of intracellular calcium ions and chemotaxis. Also binds to atypical chemokine receptor ACKR3; which activates the beta-arrestin pathway and acts as a scavenger receptor for…	3.86569	Cxcl12
C5ar2	-	-	-	-	X	-	-	0	add.P	6e-14	NA	0	NA	0	NA	7	16234585	16244154	ENSMUSG00000074361	complement component 5a receptor 2 [Source:MGI Symbol;Acc:MGI:2442013]
Rps19	-	X	-	-	-	-	-	0	dom.P	2.86e-15	12633357	2	RNA : G_Odoribacter | RNA : G_Odoribacter | RNA : G_Odoribacter | RNA : SV52	0	NA	7	24884371	24889806	ENSMUSG00000040952	ribosomal protein S19 [Source:MGI Symbol;Acc:MGI:1333780]		11	4.51293	0.0122286	0.221585	0.472727	9	FALSE	6.90909	0	11	0	0.882902	5070	0.300395	40S ribosomal protein S19; Required for pre-rRNA processing and maturation of 40S ribosomal subunits.	3.27648	Rps19
Cyp2b10	-	X	-	-	-	X	-	0	dom.P	2.86e-15	12633357	2	RNA : G_Odoribacter | RNA : G_Odoribacter | RNA : G_Odoribacter | RNA : SV52	0	NA	7	25897620	25926624	ENSMUSG00000030483	cytochrome P450, family 2, subfamily b, polypeptide 10 [Source:MGI Symbol;Acc:MGI:88598]		8	4.35345	0.00649564	0.229703	0.571429	8	FALSE	7.125	0	8	0	0.888218	3380	0.419118	Cytochrome P450; family 2; subfamily b; polypeptide 10; Cytochromes P450 are a group of heme-thiolate monooxygenases. In liver microsomes; this enzyme is involved in an NADPH-dependent electron transport pathway. It oxidizes a variety of structurally unrelated compounds; including steroids; fatty acids; and xenobiotics.	3.52196	Cyp2b10
Timm50	-	X	X	-	-	-	X	1	add.P	7.57e-17	7980628	5	RNA : G_Odoribacter | RNA : G_Odoribacter | RNA : G_Odoribacter | RNA : G_Oscillibacter | RNA : SV36 | RNA : SV36 | RNA : SV36 | RNA : SV52 | RNA : SV97 | RNA : SV97 | RNA : SV97	0	NA	7	28305516	28312072	ENSMUSG00000003438	translocase of inner mitochondrial membrane 50 [Source:MGI Symbol;Acc:MGI:1913775]		0	0	0	0	0	0	TRUE	0	0	0	0	Infinity	0	0	Mitochondrial import inner membrane translocase subunit TIM50; Essential component of the TIM23 complex; a complex that mediates the translocation of transit peptide-containing proteins across the mitochondrial inner membrane.	2.34227	Timm50
Sycn	-	X	X	-	-	-	-	1	add.P	7.57e-17	7980628	5	RNA : G_Odoribacter | RNA : G_Odoribacter | RNA : G_Odoribacter | RNA : G_Oscillibacter | RNA : SV36 | RNA : SV36 | RNA : SV36 | RNA : SV52 | RNA : SV97 | RNA : SV97 | RNA : SV97	0	NA	7	28540885	28542209	ENSMUSG00000084174	syncollin [Source:MGI Symbol;Acc:MGI:1915666]		1	5.36207	0	0.186495	0	9	FALSE	7	0	1	0	0.854598	0	0	Syncollin; Functions in exocytosis in pancreatic acinar cells regulating the fusion of zymogen granules with each other. May have a pore-forming activity on membranes and regulate exocytosis in other exocrine tissues.	4.70377	Sycn
Eif3k	-	X	X	-	-	-	-	1	add.P	7.57e-17	7980628	5	RNA : G_Odoribacter | RNA : G_Odoribacter | RNA : G_Odoribacter | RNA : G_Oscillibacter | RNA : SV36 | RNA : SV36 | RNA : SV36 | RNA : SV52 | RNA : SV97 | RNA : SV97 | RNA : SV97	0	NA	7	28971372	28981864	ENSMUSG00000053565	eukaryotic translation initiation factor 3, subunit K [Source:MGI Symbol;Acc:MGI:1921080]		6	4.56897	0.0097337	0.218868	0.6	8	FALSE	8.83333	0	6	0	0.881034	2862	0.481481	Eukaryotic translation initiation factor 3 subunit 12; Component of the eukaryotic translation initiation factor 3 (eIF-3) complex; which is required for several steps in the initiation of protein synthesis. The eIF-3 complex associates with the 40S ribosome and facilitates the recruitment of eIF-1; eIF-1A; eIF-2:GTP:methionyl-tRNAi and eIF-5 to form the 43S pre- initiation complex (43S PIC). The…	2.232	Eif3k
Fcgrt	-	X	X	-	-	-	-	2	add.P	1.22e-45	4816189	5	DNA : SV13 | DNA : SV6 | DNA : SV6 | RNA : G_Odoribacter | RNA : G_Odoribacter | RNA : G_Odoribacter | RNA : SV25 | RNA : SV49	0	NA	7	45092990	45103851	ENSMUSG00000003420	Fc receptor, IgG, alpha chain transporter [Source:MGI Symbol;Acc:MGI:103017]		0	0	0	0	0	0	TRUE	0	0	0	0	Infinity	0	0	IgG Fc fragment receptor transporter alpha chain; Binds to the Fc region of monomeric immunoglobulins gamma. Mediates the selective uptake of IgG from milk and helps newborn animals to acquire passive immunity. IgG in the milk is bound at the apical surface of the intestinal epithelium. The resultant FcRn-IgG complexes are transcytosed across the intestinal epithelium and IgG is released from FcR…	4.7184	Fcgrt
Snrnp70	X	-	X	-	-	-	-	4	add.P	1.22e-45	3047	10	DNA : SV102 | DNA : SV102 | DNA : SV102 | DNA : SV13 | DNA : SV32 | DNA : SV32 | DNA : SV32 | DNA : SV38 | DNA : SV38 | DNA : SV38 | DNA : SV47 | DNA : SV47 | DNA : SV47 | DNA : SV50 | DNA : SV50 | DNA : SV50 | DNA : SV6 | DNA : SV6 | RNA : G_Odoribacter | RNA : G_Odoribacter | RNA : G_Odoribacter | RNA : SV102 | RNA : SV102 | RNA : SV102 | RNA : SV25 | RNA : SV38 | RNA : SV49 | RNA : SV49 | RNA …	6	DNA: SV102 | SV47 | SV32 | SV50 | SV38 | RNA: SV49 | SV102 | SV38	7	45376453	45395742	ENSMUSG00000063511	small nuclear ribonucleoprotein 70 (U1) [Source:MGI Symbol;Acc:MGI:98341]		5	4.39655	0	0.227451	1	8	FALSE	7.8	0	5	0	0.886782	0	0.410526	U1 small nuclear ribonucleoprotein 70 kDa; Component of the spliceosomal U1 snRNP; which is essential for recognition of the pre-mRNA 5' splice-site and the subsequent assembly of the spliceosome. SNRNP70 binds to the loop I region of U1-snRNA. The truncated isoforms cannot bind U1-snRNA (By similarity).	2.67991	Snrnp70
Mfge8	X	-	X	-	X	-	-	2	add.P	4.27e-11	6666626	2	RNA : G_Eisenbergiella | RNA : SV35 | RNA : SV35 | RNA : SV35	1	RNA: SV35	7	79133768	79149060	ENSMUSG00000030605	milk fat globule-EGF factor 8 protein [Source:MGI Symbol;Acc:MGI:102768]		8	4	0	0.25	1	8	FALSE	12.125	0	8	0	0.9	0	0.336806	Milk fat globule-EGF factor 8 protein; Contributes to phagocytic removal of apoptotic cells in many tissues. Specific ligand for the alpha-v/beta-3 and alpha- v/beta-5 receptors. Also binds to phosphatidylserine-enriched cell surfaces in a receptor-independent manner. Zona pellucida-binding protein which may play a role in gamete interaction (By similarity). Plays an important role in the mainten…	3.39101	Mfge8
Fzd4	X	-	-	-	X	-	-	0	add.P	4.27e-11	13235297	4	DNA : unclassified_F_Rumi-coccaceae | RNA : G_Eisenbergiella | RNA : SV281 | RNA : SV77	1	RNA: G_Eisenbergiella	7	89404355	89413134	ENSMUSG00000049791	frizzled class receptor 4 [Source:MGI Symbol;Acc:MGI:108520]		4	4.19397	0.00431489	0.238438	0.5	8	FALSE	13.5	0	4	0	0.893534	596	0.389706	Frizzled homolog 4 (Drosophila); Receptor for Wnt proteins. Most of frizzled receptors are coupled to the beta-catenin (CTNNB1) canonical signaling pathway; which leads to the activation of disheveled proteins; inhibition of GSK-3 kinase; nuclear accumulation of beta-catenin (CTNNB1) and activation of Wnt target genes. Plays a critical role in retinal vascularization by acting as a receptor for W…	2.33078	Fzd4
Wnt11	X	-	-	-	X	-	-	0	add.P	4.27e-11	6668138	5	DNA : SV21 | RNA : G_Eisenbergiella | RNA : SV281 | RNA : SV40 | RNA : SV77	3	DNA: SV21 | RNA: SV40 | RNA: G_Eisenbergiella	7	98835112	98855195	ENSMUSG00000015957	wingless-type MMTV integration site family, member 11 [Source:MGI Symbol;Acc:MGI:101948]		6	3.89655	0.0185923	0.256637	0.266667	8	FALSE	10.6667	0	6	0	0.903448	3672	0.269231	Wingless-related MMTV integration site 11; Ligand for members of the frizzled family of seven transmembrane receptors. Probable developmental protein. May be a signaling molecule which affects the development of discrete regions of tissues. Is likely to signal over only few cell diameters; Belongs to the Wnt family.	2.53962	Wnt11
Pth	X	-	-	-	X	-	-	0	add.P	4.27e-11	56478114	1	RNA : G_Eisenbergiella	1	RNA: G_Eisenbergiella	7	113385580	113388570	ENSMUSG00000059077	parathyroid hormone [Source:MGI Symbol;Acc:MGI:97799]		11	3.46983	0.0395996	0.288199	0.327273	7	FALSE	10.4545	0	11	0	0.917672	8648	0.180223	Parathyroid hormone; PTH elevates calcium level by dissolving the salts in bone and preventing their renal excretion.	2.79386	Pth
Calca	X	-	-	-	X	-	-	0	add.P	4.27e-11	56478114	1	RNA : G_Eisenbergiella	1	RNA: G_Eisenbergiella	7	114631478	114636357	ENSMUSG00000030669	calcitonin/calcitonin-related polypeptide, alpha [Source:MGI Symbol;Acc:MGI:2151253]		6	3.91379	0	0.255507	1	7	FALSE	12.1667	0	6	0	0.902874	0	0.296748	Calcitonin/calcitonin-related polypeptide; alpha; Causes a rapid but short-lived drop in the level of calcium and phosphate in blood by promoting the incorporation of those ions in the bones.	2.83525	Calca
Nucb2	X	X	-	-	-	-	-	0	add.P	4.27e-11	56478114	1	RNA : G_Eisenbergiella	2	DNA: G_Marvinbryantia | RNA: G_Eisenbergiella | RNA: G_Eisenbergiella	7	116504369	116540584	ENSMUSG00000030659	nucleobindin 2 [Source:MGI Symbol;Acc:MGI:1858179]		1	5.03448	0	0.19863	0	9	FALSE	12	0	1	0	0.865517	0	0	DNA-binding protein NEFA; Calcium-binding protein. May have a role in calcium homeostasis; Belongs to the nucleobindin family.	2.78497	Nucb2
Rplp2	-	X	X	-	-	-	-	2	add.P	1.26e-16	2010075	4	DNA : G_Odoribacter | DNA : G_Odoribacter | DNA : G_Odoribacter | DNA : SV70 | RNA : G_Odoribacter | RNA : G_Odoribacter | RNA : G_Odoribacter | RNA : SV3 | RNA : SV3 | RNA : SV52 | RNA : SV52 | RNA : SV52	0	NA	7	141447370	141451585	ENSMUSG00000025508	ribosomal protein, large P2 [Source:MGI Symbol;Acc:MGI:1914436]		10	4.35345	0.0176798	0.229703	0.466667	8	FALSE	7.5	0	10	0	0.888218	5186	0.296	60S acidic ribosomal protein P2; Plays an important role in the elongation step of protein synthesis.	3.10229	Rplp2
Myom2	X	X	X	-	-	-	-	3	add.P	1.2e-12	4119145	4	DNA : SV119 | DNA : SV64 | DNA : SV64 | DNA : SV98 | DNA : SV98 | DNA : SV98 | RNA : SV396 | RNA : SV64 | RNA : SV64 | RNA : SV98 | RNA : SV98	3	DNA: SV64 | SV98 | SV119 | RNA: SV98 | SV64	8	15057653	15133541	ENSMUSG00000031461	myomesin 2 [Source:MGI Symbol;Acc:MGI:1328358]		2	1	0	1	1	1	FALSE	2	0	2	0	1	0	1	Myomesin 2	0.854403	Myom2
Nrg1	X	-	-	-	-	-	-	0	add.P	3.88e-15	18905	3	DNA : SV32 | DNA : SV32 | DNA : SV32 | DNA : SV47 | DNA : SV47 | RNA : SV49	3	DNA: SV32 | SV47 | DNA: SV32 | SV47 | DNA: SV32 | SV47 | DNA: SV32 | SV47 | RNA: SV49	8	31814551	32884797	ENSMUSG00000062991	neuregulin 1 [Source:MGI Symbol;Acc:MGI:96083]		2	4.73707	0.00633926	0.211101	0	8	FALSE	8	0	2	0	0.875431	1206	0.5	Neuregulin-1 type III beta1-a; Neuregulin 1	2.66141	Nrg1
Adcy7	X	-	-	-	X	-	-	0	dom.P	3.6e-33	227861	3	DNA : SV17 | DNA : SV17 | RNA : unclassified_C_Deltaproteobacteria | RNA : unclassified_C_Deltaproteobacteria | RNA : unclassified_C_Deltaproteobacteria | RNA : SV234 | RNA : SV234 | RNA : SV234	1	RNA: unclassified_C_Deltaproteobacteria	8	88272403	88329962	ENSMUSG00000031659	adenylate cyclase 7 [Source:MGI Symbol;Acc:MGI:102891]		6	3.91379	0	0.255507	1	7	FALSE	12.1667	0	6	0	0.902874	0	0.296748	Adenylate cyclase type VII; This is a membrane-bound; calcium-inhibitable adenylyl cyclase; Belongs to the adenylyl cyclase class-4/guanylyl cyclase family.	1.63804	Adcy7
Ces1e	-	X	X	-	-	-	-	1	dom.P	3.6e-33	9144999	2	DNA : SV17 | DNA : SV17 | RNA : SV234 | RNA : SV234 | RNA : SV234	0	NA	8	93201218	93229619	ENSMUSG00000061959	carboxylesterase 1E [Source:MGI Symbol;Acc:MGI:95432]		1	5.77586	0	0.173134	0	9	FALSE	3	0	1	0	0.840805	0	0	Liver carboxylesterase 22; Involved in the detoxification of xenobiotics and in the activation of ester and amide prodrugs.	2.29964	Ces1e
Ces1f	-	X	X	-	-	-	-	1	dom.P	3.6e-33	9144999	2	DNA : SV17 | DNA : SV17 | RNA : SV234 | RNA : SV234 | RNA : SV234	0	NA	8	93256236	93279747	ENSMUSG00000031725	carboxylesterase 1F [Source:MGI Symbol;Acc:MGI:2142687]		3	4.78017	0.00968653	0.209197	0	8	FALSE	4.66667	0	3	0	0.873994	2840	0.458333	Triacylglycerol hydrolase 2; Hydrolyzes p-nitrophenyl butyrate (PNPB); triacylglycerol and monoacylglycerol. Shows higher activity against PNPB; a short-chain fatty acid ester; than against triolein; a long-chain fatty acid ester. Shows no detectable activity against diacylglycerol; cholesterol ester or phospholipids. May play a role in adipocyte lipolysis; Belongs to the type-B carboxylesterase/…	3.01341	Ces1f
Chordc1	X	X	-	-	-	-	-	0	dom.P	1.04e-11	663124	2	RNA : SV26 | RNA : SV281 | RNA : SV281	1	RNA: SV26 | RNA: SV26 | RNA: SV26	9	18292125	18317442	ENSMUSG00000001774	cysteine and histidine-rich domain (CHORD)-containing, zinc-binding protein 1 [Source:MGI Symbol;Acc:MGI:1914167]		2	4.73276	0.00357562	0.211293	0	9	FALSE	7	0	2	0	0.875575	572	0.5	Cysteine and histidine-rich domain (CHORD)-containing; zinc-binding protein 1; Regulates centrosome duplication; probably by inhibiting the kinase activity of ROCK2. Proposed to act as co-chaperone for HSP90. May play a role in the regulation of NOD1 via a HSP90 chaperone complex. In vitro; has intrinsic chaperone activity. This function may be achieved by inhibiting association of ROCK2 with NPM…	2.0522	Chordc1
Gclc	-	X	X	-	-	-	X	2	add.P	3.27e-09	6904818	2	DNA : unclassified_P_Bacteroidetes | RNA : SV97	0	NA	9	77754535	77794485	ENSMUSG00000032350	glutamate-cysteine ligase, catalytic subunit [Source:MGI Symbol;Acc:MGI:104990]		8	4.38793	0.0174943	0.227898	0.285714	8	FALSE	5.875	0	8	0	0.887069	5170	0.319444	Glutamate-cysteine ligase; catalytic subunit; Belongs to the glutamate--cysteine ligase type 3 family.	3.10968	Gclc
Gsta4	-	X	X	-	-	X	-	2	add.P	3.27e-09	6904818	2	DNA : unclassified_P_Bacteroidetes | RNA : SV97	0	NA	9	78182774	78209349	ENSMUSG00000032348	glutathione S-transferase, alpha 4 [Source:MGI Symbol;Acc:MGI:1309515]		7	4.66379	0.000817557	0.214418	0.809524	8	FALSE	8.14286	0	7	0	0.877874	560	0.508929	Glutathione S-transferase; alpha 4; Conjugation of reduced glutathione to a wide number of exogenous and endogenous hydrophobic electrophiles.	3.30119	Gsta4
Gsta1	-	X	X	-	-	X	-	2	add.P	3.27e-09	6904818	2	DNA : unclassified_P_Bacteroidetes | RNA : SV97	0	NA	9	78230656	78242684	ENSMUSG00000074183	glutathione S-transferase, alpha 1 (Ya) [Source:MGI Symbol;Acc:MGI:1095417]		7	4.66379	0.000817557	0.214418	0.809524	8	FALSE	8.14286	0	7	0	0.877874	560	0.508929	Glutathione S-transferase; alpha 1 (Ya); Conjugation of reduced glutathione to a wide number of exogenous and endogenous hydrophobic electrophiles; Belongs to the GST superfamily. Alpha family.	3.50303	Gsta1
Tent5a	X	X	-	-	-	-	-	0	add.P	6.34e-13	0	1	RNA SV248 | RNA SV248	1	RNA: SV248	9	85320439	85327348	ENSMUSG00000032265	terminal nucleotidyltransferase 5A [Source:MGI Symbol;Acc:MGI:2670964]
Arpp21	-	-	-	-	-	-	-	0	add.P	1.59e-12	5309120	2	RNA : SV22 | RNA : SV22 | RNA : SV36 | RNA : SV36 | RNA : SV36	0	NA	9	112065091	112235938	ENSMUSG00000032503	cyclic AMP-regulated phosphoprotein, 21 [Source:MGI Symbol;Acc:MGI:107562]		0	0	0	0	0	0	TRUE	0	0	0	0	Infinity	0	0	Cyclic AMP-regulated phosphoprotein; 21	1.08493	Arpp21
Pdcd6ip	-	-	X	-	-	-	-	6	add.P	1.21e-14	1240848	3	RNA : SV22 | RNA : SV22 | RNA : SV36 | RNA : SV36 | RNA : SV36 | RNA : SV88 | RNA : SV88 | RNA : SV88	0	NA	9	113651744	113708259	ENSMUSG00000032504	programmed cell death 6 interacting protein [Source:MGI Symbol;Acc:MGI:1333753]		2	4.40948	0	0.226784	1	8	FALSE	8.5	0	2	0	0.886351	0	0.566667	Programmed cell death 6 interacting protein; Multifunctional protein involved in endocytosis; multivesicular body biogenesis; membrane repair; cytokinesis; apoptosis and maintenance of tight junction integrity. Class E VPS protein involved in concentration and sorting of cargo proteins of the multivesicular body (MVB) for incorporation into intralumenal vesicles (ILVs) that are generated by invag…	2.94614	Pdcd6ip
Clasp2	X	-	X	-	-	-	-	6	add.P	1.21e-14	1240848	3	RNA : SV22 | RNA : SV22 | RNA : SV36 | RNA : SV36 | RNA : SV36 | RNA : SV88 | RNA : SV88 | RNA : SV88	1	RNA: SV88	9	113741473	113919682	ENSMUSG00000033392	CLIP associating protein 2 [Source:MGI Symbol;Acc:MGI:1923749]		4	4.09914	0.000180245	0.243954	0.666667	8	FALSE	7.75	0	4	0	0.896695	38	0.430556	Cytoplasmic linker-associated protein 2; Microtubule plus-end tracking protein that promotes the stabilization of dynamic microtubules. Involved in the nucleation of noncentrosomal microtubules originating from the trans-Golgi network (TGN). Required for the polarization of the cytoplasmic microtubule arrays in migrating cells towards the leading edge of the cell. May act at the cell cortex to en…	1.18933	Clasp2
Ubp1	-	-	X	-	-	-	-	6	add.P	1.59e-12	5309120	2	RNA : SV22 | RNA : SV22 | RNA : SV36 | RNA : SV36 | RNA : SV36	0	NA	9	113930934	113977202	ENSMUSG00000009741	upstream binding protein 1 [Source:MGI Symbol;Acc:MGI:104889]		1	6.56034	0	0.152431	0	10	FALSE	2	0	1	0	0.814655	0	0	Upstream binding protein 1; Functions as a transcriptional activator in a promoter context-dependent manner. Involved in regulation of the alpha- globin gene in erythroid cells. Activation of the alpha-globin promoter in erythroid cells is via synergistic interaction with TFCP2. Functions as a trans-acting factor that regulates the domestic strain CYP2D9 gene through specific association with the…	1.5412	Ubp1
Fbxl2	-	-	X	-	-	-	-	6	add.P	1.59e-12	5309120	2	RNA : SV22 | RNA : SV22 | RNA : SV36 | RNA : SV36 | RNA : SV36	0	NA	9	113963637	114046191	ENSMUSG00000032507	F-box and leucine-rich repeat protein 2 [Source:MGI Symbol;Acc:MGI:1919429]		3	4.57759	0.0197363	0.218456	0	8	FALSE	3.66667	0	3	0	0.880747	3622	0.333333	F-box and leucine-rich repeat protein 2; Calcium-activated substrate recognition component of the SCF (SKP1-cullin-F-box protein) E3 ubiquitin-protein ligase complex; SCF(FBXL2); which mediates the ubiquitination and subsequent proteasomal degradation of target proteins. Unlike many F-box proteins; FBXL2 does not seem to target phosphodegron within its substrates but rather calmodulin-binding mot…	1.11268	Fbxl2
Susd5	-	-	X	-	-	-	-	6	add.P	1.59e-12	5309120	2	RNA : SV22 | RNA : SV22 | RNA : SV36 | RNA : SV36 | RNA : SV36	0	NA	9	114057140	114098728	ENSMUSG00000086596	sushi domain containing 5 [Source:MGI Symbol;Acc:MGI:2685972]		2	5.56466	0.00862069	0.179706	0	9	FALSE	2	0	2	0	0.847845	1566	0.5	Sushi domain containing 5		Susd5
Xcr1	X	-	-	X	-	-	-	0	add.P	8.53e-11	0	3	DNA : SV32 | DNA : SV47 | DNA : SV47 | RNA : SV102 | RNA : SV102 | RNA : SV102	3	DNA: SV47 | SV32 | RNA: SV102	9	123852315	123862029	ENSMUSG00000060509	chemokine (C motif) receptor 1 [Source:MGI Symbol;Acc:MGI:1346338]		12	3.96552	0.00222699	0.252174	0.757576	8	FALSE	14.6667	0	12	0	0.901149	792	0.357724	Chemokine (C motif) receptor 1; Receptor for chemokines SCYC1 and SCYC2. Subsequently transduces a signal by increasing the intracellular calcium ions level. Receptor for XCL1/Lymphotactin (Probable).	1.9902	Xcr1
Iyd	X	X	-	-	-	-	-	0	add.P	1.53e-17	13013375	2	RNA G_Odoribacter | RNA G_Odoribacter | RNA G_Odoribacter | RNA SV52 | RNA SV52 | RNA SV52	2	RNA: SV52 | G_Odoribacter	10	3540240	3554877	ENSMUSG00000019762	iodotyrosine deiodinase [Source:MGI Symbol;Acc:MGI:1917587]		3	4.84052	0	0.206589	1	9	FALSE	11.3333	0	3	0	0.871983	0	0.755556	Iodotyrosine dehalogenase 1; Catalyzes the oxidative NADPH-dependent deiodination of monoiodotyrosine (L-MIT) or diiodotyrosine (L-DIT). Acts during the hydrolysis of thyroglobulin to liberate iodide; which can then reenter the hormone-producing pathways. Acts more efficiently on monoiodotyrosine than on diiodotyrosine (By similarity).	2.20744	Iyd
Epm2a	X	-	-	-	-	-	-	0	add.P	1.53e-17	13013375	2	RNA : G_Odoribacter | RNA : G_Odoribacter | RNA : G_Odoribacter | RNA : SV52 | RNA : SV52 | RNA : SV52	3	DNA: SV17 | RNA: SV52 | G_Odoribacter | RNA: SV52 | G_Odoribacter | RNA: G_Odoribacter | SV52	10	11343404	11459644	ENSMUSG00000055493	epilepsy, progressive myoclonic epilepsy, type 2 gene alpha [Source:MGI Symbol;Acc:MGI:1341085]		0	0	0	0	0	0	TRUE	0	0	0	0	Infinity	0	0	Epilepsy; progressive myoclonic epilepsy; type 2 gene alpha; Plays an important role in preventing glycogen hyperphosphorylation and the formation of insoluble aggregates; via its activity as glycogen phosphatase; and by promoting the ubiquitination of proteins involved in glycogen metabolism via its interaction with the E3 ubiquitin ligase NHLRC1/malin. Dephosphorylates phosphotyrosine and synth…	0.689688	Epm2a
Utrn	X	-	-	-	-	-	-	0	add.P	1.53e-17	13013375	2	RNA : G_Odoribacter | RNA : G_Odoribacter | RNA : G_Odoribacter | RNA : SV52 | RNA : SV52 | RNA : SV52	3	DNA: SV17 | RNA: SV52 | G_Odoribacter | RNA: G_Odoribacter | SV52	10	12382188	12869365	ENSMUSG00000019820	utrophin [Source:MGI Symbol;Acc:MGI:104631]		2	4.88793	0.00422737	0.204586	0	8	FALSE	2	0	2	0	0.870402	734	0.5	Utrophin	2.24637	Utrn
Pbld1	-	X	X	-	-	-	-	1	add.P	7.67e-13	9262858	1	RNA : SV97 | RNA : SV97	0	NA	10	63060162	63077962	ENSMUSG00000112129	phenazine biosynthesis-like protein domain containing 1 [Source:MGI Symbol;Acc:MGI:1915621]		0	0	0	0	0	0	TRUE	0	0	0	0	Infinity	0	0	Phenazine biosynthesis-like protein domain containing 1; Belongs to the PhzF family.	2.13288	Pbld1
Wdr18	-	X	X	-	-	-	-	1	P	4.93e-09	9790596	1	RNA : G_Odoribacter	0	NA	10	79960152	79970203	ENSMUSG00000035754	WD repeat domain 18 [Source:MGI Symbol;Acc:MGI:2158400]		1	5.50431	0	0.181676	0	9	FALSE	7	0	1	0	0.849856	0	0	WD repeat-containing protein 18; May play a role during development (By similarity). Functions as a component of the Five Friends of Methylated CHTOP (5FMC) complex; the 5FMC complex is recruited to ZNF148 by methylated CHTOP; leading to desumoylation of ZNF148 and subsequent transactivation of ZNF148 target genes; Belongs to the WD repeat IPI3/WDR18 family.	2.24557	Wdr18
Snrpf	-	X	-	-	-	-	-	0	add.P	2.34e-10	15224346	1	RNA : G_Odoribacter	0	NA	10	93583029	93589706	ENSMUSG00000020018	small nuclear ribonucleoprotein polypeptide F [Source:MGI Symbol;Acc:MGI:1917128]		9	4.15948	0.0425475	0.240415	0.305556	8	FALSE	6.33333	0	9	0	0.894684	8634	0.218254	Small nuclear ribonucleoprotein polypeptide F; Core component of the spliceosomal U1; U2; U4 and U5 small nuclear ribonucleoproteins (snRNPs); the building blocks of the spliceosome. Thereby; plays an important role in the splicing of cellular pre-mRNAs. Most spliceosomal snRNPs contain a common set of Sm proteins SNRPB; SNRPD1; SNRPD2; SNRPD3; SNRPE; SNRPF and SNRPG that assemble in a heptameric…	2.40266	Snrpf
Nr2c1	X	-	X	-	-	-	-	2	add.P	2.34e-10	95467	2	DNA : SV17 | RNA : G_Odoribacter	1	DNA: SV17	10	94148023	94197211	ENSMUSG00000005897	nuclear receptor subfamily 2, group C, member 1 [Source:MGI Symbol;Acc:MGI:1352465]		0	0	0	0	0	0	TRUE	0	0	0	0	Infinity	0	0	Nuclear receptor subfamily 2; group C; member 1; Orphan nuclear receptor. Binds the IR7 element in the promoter of its own gene in an autoregulatory negative feedback mechanism. Primarily repressor of a broad range of genes including ESR1 and RARB. Together with NR2C2; forms the core of the DRED (direct repeat erythroid-definitive) complex that represses embryonic and fetal globin transcription. …	1.35757	Nr2c1
Ndufa12	-	X	X	-	-	-	-	2	add.P	2.34e-10	95467	2	DNA : SV17 | RNA : G_Odoribacter	0	NA	10	94198720	94221443	ENSMUSG00000020022	NADH:ubiqui-ne oxidoreductase subunit A12 [Source:MGI Symbol;Acc:MGI:1913664]		1	4.91379	0	0.203509	0	8	FALSE	6	0	1	0	0.86954	0	0	NADH dehydrogenase [ubiquinone] 1 alpha subcomplex subunit 12; Accessory subunit of the mitochondrial membrane respiratory chain NADH dehydrogenase (Complex I); that is believed not to be involved in catalysis. Complex I functions in the transfer of electrons from NADH to the respiratory chain. The immediate electron acceptor for the enzyme is believed to be ubiquinone.	2.47794	Ndufa12
Lyz1	-	X	-	-	-	-	X	0	add.P	2.48e-09	17240418	1	RNA : SV115	0	NA	10	117287797	117292868	ENSMUSG00000069515	lysozyme 1 [Source:MGI Symbol;Acc:MGI:96902]
Cdc42se2	-	X	X	-	-	-	-	2	add.P	4.91e-10	8792908	1	RNA : SV130	0	NA	11	54717456	54787675	ENSMUSG00000052298	CDC42 small effector 2 [Source:MGI Symbol;Acc:MGI:1919979]		2	4.60345	0.00685436	0.217228	0	8	FALSE	4.5	0	2	0	0.879885	928	0.5	CDC42 small effector protein 2; Probably involved in the organization of the actin cytoskeleton by acting downstream of CDC42; inducing actin filament assembly. Alters CDC42-induced cell shape changes. In activated T-cells; may play a role in CDC42-mediated F-actin accumulation at the immunological synapse. May play a role in early contractile events in phagocytosis in macrophages (By similarity).	2.29293	Cdc42se2
Hint1	-	X	X	-	-	-	-	2	add.P	4.91e-10	8792908	1	RNA : SV130	0	NA	11	54866383	54870501	ENSMUSG00000020267	histidine triad nucleotide binding protein 1 [Source:MGI Symbol;Acc:MGI:1321133]		7	3.81466	0.0562189	0.262147	0.142857	8	FALSE	7.14286	0	7	0	0.906178	12178	0.170732	Histidine triad nucleotide binding protein 1; Hydrolyzes purine nucleotide phosphoramidates with a single phosphate group; including adenosine 5'monophosphoramidate (AMP-NH2); adenosine 5'monophosphomorpholidate (AMP-morpholidate) and guanosine 5'monophosphomorpholidate (GMP-morpholidate). Hydrolyzes lysyl-AMP (AMP-N-epsilon-(N-alpha-acetyl lysine methyl ester)) generated by lysine tRNA ligase; a…	3.1635	Hint1
Nmur2	X	-	X	X	-	-	-	2	add.P	5.67e-21	8792908	1	RNA : SV130	5	DNA: G_Dorea | RNA: SV293 | SV184 | G_Dorea | DNA: G_Butyricicoccus | DNA: G_Butyricicoccus | DNA: G_Dorea | RNA: G_Dorea | SV184 | SV293 | RNA: SV12	11	56024987	56041010	ENSMUSG00000037393	neuromedin U receptor 2 [Source:MGI Symbol;Acc:MGI:2441765]		18	3.71552	0.00904559	0.269142	0.594771	8	FALSE	14.1667	0	18	0	0.909483	3282	0.252976	Neuromedin U receptor 2; Receptor for the neuromedin-U and neuromedin-S neuropeptides.	1.34322	Nmur2
Gria1	X	-	-	-	-	-	-	0	add.P	5.67e-21	4077410	4	DNA : G_Dorea | DNA : G_Dorea | DNA : G_Dorea | RNA : G_Dorea | RNA : G_Dorea | RNA : G_Dorea | RNA : SV130 | RNA : SV184 | RNA : SV184 | RNA : SV184 | RNA : SV293 | RNA : SV293 | RNA : SV293	4	DNA: G_Dorea | RNA: SV293 | SV184 | G_Dorea | DNA: G_Butyricicoccus | DNA: G_Butyricicoccus | DNA: G_Dorea | RNA: G_Dorea | SV184 | SV293	11	57011387	57330244	ENSMUSG00000020524	glutamate receptor, io-tropic, AMPA1 (alpha 1) [Source:MGI Symbol;Acc:MGI:95808]		4	4.01724	0.0236865	0.248927	0.166667	7	FALSE	7.75	0	4	0	0.899425	6094	0.426471	Glutamate receptor; ionotropic; AMPA1 (alpha 1); Ionotropic glutamate receptor. L-glutamate acts as an excitatory neurotransmitter at many synapses in the central nervous system. Binding of the excitatory neurotransmitter L- glutamate induces a conformation change; leading to the opening of the cation channel; and thereby converts the chemical signal to an electrical impulse. The receptor then de…	1.62073	Gria1
Alox15	-	X	-	-	-	-	X	0	add.P	3.4e-10	5457231	2	DNA : F_Prevotellaceae | RNA : SV115	0	NA	11	70344152	70352031	ENSMUSG00000018924	arachidonate 15-lipoxygenase [Source:MGI Symbol;Acc:MGI:87997]		5	3.85776	0.0279951	0.259218	0.5	7	FALSE	9.4	0	5	0	0.904741	8472	0.4	Arachidonate 12-lipoxygenase; leukocyte-type; Non-heme iron-containing dioxygenase that catalyzes the stereo-specific peroxidation of free and esterified polyunsaturated fatty acids generating a spectrum of bioactive lipid mediators. Converts arachidonic acid into 12- hydroperoxyeicosatetraenoic acid/12-HPETE and 15- hydroperoxyeicosatetraenoic acid/15-HPETE. Also converts linoleic acid to 13-hyd…	2.2519	Alox15
Phb	-	X	-	-	-	-	X	0	add.P	1.74e-56	15944623	2	RNA : SV184 | RNA : SV184 | RNA : SV293 | RNA : SV293	0	NA	11	95666957	95680773	ENSMUSG00000038845	prohibitin [Source:MGI Symbol;Acc:MGI:97572]
Eif1	-	X	-	-	-	-	-	0	dom.P	1.41e-16	NA	0	NA	0	NA	11	100319885	100322096	ENSMUSG00000035530	eukaryotic translation initiation factor 1 [Source:MGI Symbol;Acc:MGI:105125]		4	5.09052	0	0.196444	1	9	FALSE	9.75	0	4	0	0.863649	0	0.65	Eukaryotic translation initiation factor 1; Necessary for scanning and involved in initiation site selection. Promotes the assembly of 48S ribosomal complexes at the authentic initiation codon of a conventional capped mRNA (By similarity).	2.88146	Eif1
Rnf144a	X	-	-	-	-	-	-	0	add.P	2.77e-15	0	6	DNA : G_Roseburia | DNA : G_Roseburia | RNA : SV151 | RNA : SV151 | RNA : SV151 | RNA : SV22 | RNA : SV40 | RNA : SV40 | RNA : SV40 | RNA : SV63 | RNA : SV63 | RNA : SV63 | RNA : SV97	4	DNA: G_Roseburia | RNA: SV63 | SV40 | SV151	12	26300964	26415254	ENSMUSG00000020642	ring finger protein 144A [Source:MGI Symbol;Acc:MGI:1344401]		0	0	0	0	0	0	TRUE	0	0	0	0	Infinity	0	0	Ubiquitin-conjugating enzyme 7-interacting protein 4; E3 ubiquitin-protein ligase which accepts ubiquitin from E2 ubiquitin-conjugating enzymes UBE2L3 and UBE2L6 in the form of a thioester and then directly transfers the ubiquitin to targeted substrates. Mediates the ubiquitination and degradation of the DNA damage kinase PRKDC.	0.080596	Rnf144a
Lamb1	-	X	-	-	-	-	X	0	add.P	9.32e-09	13907319	1	RNA : G_Acetatifactor	0	NA	12	31265234	31329644	ENSMUSG00000002900	laminin B1 [Source:MGI Symbol;Acc:MGI:96743]
Slc26a3	X	X	X	-	-	-	-	4	add.P	6.63e-15	3365103	4	DNA : unclassified_C_Deltaproteobacteria | DNA : unclassified_C_Deltaproteobacteria | DNA : unclassified_C_Deltaproteobacteria | DNA : unclassified_F_Porphyromonadaceae | DNA : unclassified_F_Porphyromonadaceae | DNA : unclassified_F_Porphyromonadaceae | DNA : SV29 | DNA : SV29 | DNA : SV29 | RNA : G_Acetatifactor	3	DNA: unclassified_C_Deltaproteobacteria | unclassified_F_Porphyromonadaceae | SV29	12	31390871	31473917	ENSMUSG00000001225	solute carrier family 26, member 3 [Source:MGI Symbol;Acc:MGI:107181]		0	0	0	0	0	0	TRUE	0	0	0	0	Infinity	0	0	Solute carrier family 26; member 3; Chloride/bicarbonate exchanger. Mediates the efficient absorption of chloride ions in the colon; participating in fluid homeostasis. Plays a role in the chloride and bicarbonate homeostasis during sperm epididymal maturation and capacitation; Belongs to the SLC26A/SulP transporter (TC 2.A.53) family.	3.9139	Slc26a3
Immp2l	X	-	-	-	-	-	-	0	dom.P	9.88e-21	0	8	DNA : F_Staphylococcaceae | DNA : G_Staphylococcus | DNA : O_Bacillales | DNA : SV9 | RNA : G_Acetatifactor | RNA : G_Marvinbryantia | RNA : SV238 | RNA : SV36 | RNA : SV36 | RNA : SV36	7	DNA: SV9 | O_Bacillales | G_Staphylococcus | F_Staphylococcaceae | RNA: SV36 | G_Marvinbryantia | SV238 | RNA: SV36	12	41024090	41955588	ENSMUSG00000056899	IMP2 inner mitochondrial membrane peptidase-like (S. cerevisiae) [Source:MGI Symbol;Acc:MGI:2135611]		0	0	0	0	0	0	TRUE	0	0	0	0	Infinity	0	0	IMP2 inner mitochondrial membrane peptidase-like (S. cerevisiae); Catalyzes the removal of transit peptides required for the targeting of proteins from the mitochondrial matrix; across the inner membrane; into the inter-membrane space. Known to process the nuclear encoded protein DIABLO (By similarity).	1.10642	Immp2l
Actr10	-	X	X	-	-	-	X	1	add.P	4.45e-10	5639950	2	RNA : G_Marvinbryantia | RNA : SV229	0	NA	12	70937857	70964718	ENSMUSG00000021076	ARP10 actin-related protein 10 [Source:MGI Symbol;Acc:MGI:1891654]		6	3.75431	0.00133689	0.266361	0.733333	7	FALSE	10	0	6	0	0.90819	382	0.277778	ARP10 actin-related protein 10; Belongs to the actin family.	1.55322	Actr10
Gpx2	-	X	-	-	-	-	-	0	dom.P	2.86e-15	NA	0	NA	0	NA	12	76792333	76795554	ENSMUSG00000042808	glutathione peroxidase 2 [Source:MGI Symbol;Acc:MGI:106609]		9	3.93966	0.0259885	0.253829	0.416667	7	FALSE	8.22222	0	9	0	0.902011	7416	0.266667	Glutathione peroxidase 2	3.68549	Gpx2
Serpina3b	X	-	-	-	X	-	-	0	add.P	1.43e-13	50809	3	RNA : G_Marvinbryantia | RNA : SV158 | RNA : SV158 | RNA : SV158 | RNA : SV370	2	RNA: SV158 | SV370	12	104127996	104139545	ENSMUSG00000066364	serine (or cysteine) peptidase inhibitor, clade A, member 3B [Source:MGI Symbol;Acc:MGI:2182835]		7	3.48276	0.0295761	0.287129	0.52381	7	FALSE	10.4286	0	7	0	0.917241	7974	0.221884	Serine (or cysteine) peptidase inhibitor; clade A; member 3B	1.82091	Serpina3b
Dync1h1	X	-	-	-	X	-	-	0	dom.P	1.32e-18	6298095	1	RNA : SV36 | RNA : SV36 | RNA : SV36	1	RNA: SV36	12	110601452	110666945	ENSMUSG00000018707	dynein cytoplasmic 1 heavy chain 1 [Source:MGI Symbol;Acc:MGI:103147]		14	3.24569	0.0985948	0.308101	0.197802	7	FALSE	7.21429	0	14	0	0.925144	17228	0.121065	Cytoplasmic dynein 1 heavy chain 1; Cytoplasmic dynein 1 acts as a motor for the intracellular retrograde motility of vesicles and organelles along microtubules. Dynein has ATPase activity; the force-producing power stroke is thought to occur on release of ADP. Plays a role in mitotic spindle assembly and metaphase plate congression.	2.91094	Dync1h1
Chrm3	X	-	-	X	-	-	-	0	add.P	1.01e-19	1541811	3	RNA SV293 | RNA G_Fusicatenibacter | RNA G_Fusicatenibacter | RNA G_Fusicatenibacter | RNA SV133 | RNA SV133 | RNA SV133	3	RNA: SV293 | RNA: G_Fusicatenibacter | SV133	13	9875486	10360847	ENSMUSG00000046159	cholinergic receptor, muscarinic 3, cardiac [Source:MGI Symbol;Acc:MGI:88398]		11	4.09052	0.000663805	0.244468	0.836364	8	FALSE	14	0	11	0	0.896983	166	0.388889	Cholinergic receptor; muscarinic 3; cardiac; The muscarinic acetylcholine receptor mediates various cellular responses; including inhibition of adenylate cyclase; breakdown of phosphoinositides and modulation of potassium channels through the action of G proteins. Primary transducing effect is Pi turnover.	2.22749	Chrm3
Adcy2	X	-	X	-	X	-	-	3	add.P	9.88e-21	1313430	1	RNA : SV36	1	RNA: SV36	13	68620043	68999541	ENSMUSG00000021536	adenylate cyclase 2 [Source:MGI Symbol;Acc:MGI:99676]		7	3.90948	0.000697437	0.255788	0.761905	7	FALSE	12.5714	0	7	0	0.903017	136	0.30662	ATP pyrophosphate-lyase 2; Catalyzes the formation of the signaling molecule cAMP in response to G-protein signaling. Down-stream signaling cascades mediate changes in gene expression patterns and lead to increased IL6 production. Functions in signaling cascades downstream of the muscarinic acetylcholine receptors; Belongs to the adenylyl cyclase class-4/guanylyl cyclase family.	1.06719	Adcy2
Cox7c	X	X	-	-	-	-	-	0	add.P	6e-14	20874750	1	RNA : SV101 | RNA : SV101 | RNA : SV101	1	RNA: SV101	13	86044816	86046904	ENSMUSG00000017778	cytochrome c oxidase subunit 7C [Source:MGI Symbol;Acc:MGI:103226]		2	4.63362	0	0.215814	1	9	FALSE	9.5	0	2	0	0.878879	0	0.558824	Cytochrome c oxidase subunit 7C; mitochondrial; This protein is one of the nuclear-coded polypeptide chains of cytochrome c oxidase; the terminal oxidase in mitochondrial electron transport.	2.92249	Cox7c
Hexb	-	X	-	-	-	-	X	0	add.P	6e-14	20874750	1	RNA : SV101 | RNA : SV101 | RNA : SV101	0	NA	13	97176331	97198357	ENSMUSG00000021665	hexosaminidase B [Source:MGI Symbol;Acc:MGI:96074]
Pik3r1	X	-	-	-	X	-	-	0	add.P	6e-14	5418384	2	RNA : SV101 | RNA : SV101 | RNA : SV101 | RNA : SV85 | RNA : SV85 | RNA : SV85	1	RNA: SV101	13	101680563	101768217	ENSMUSG00000041417	phosphoi-sitide-3-kinase regulatory subunit 1 [Source:MGI Symbol;Acc:MGI:97583]		14	4	0.0221795	0.25	0.527473	8	FALSE	11.9286	0	14	0	0.9	4988	0.294643	Phosphatidylinositol 3-kinase; regulatory subunit; polypeptide 1 (p85 alpha); Binds to activated (phosphorylated) protein-Tyr kinases; through its SH2 domain; and acts as an adapter; mediating the association of the p110 catalytic unit to the plasma membrane. Necessary for the insulin-stimulated increase in glucose uptake and glycogen synthesis in insulin-sensitive tissues. Plays an important rol…	3.20852	Pik3r1
Nln	X	X	-	-	-	-	-	0	add.P	6e-14	5418384	2	RNA : SV101 | RNA : SV101 | RNA : SV85 | RNA : SV85 | RNA : SV85	1	RNA: SV85	13	104023057	104109614	ENSMUSG00000021710	neurolysin (metallopeptidase M3 family) [Source:MGI Symbol;Acc:MGI:1923055]		0	0	0	0	0	0	TRUE	0	0	0	0	Infinity	0	0	Neurolysin (metallopeptidase M3 family); Hydrolyzes oligopeptides such as neurotensin; bradykinin and dynorphin A; Belongs to the peptidase M3 family.	0.948871	Nln
Glud1	-	X	-	-	-	-	-	0	add.P	2.36e-09	39215731	1	RNA : SV63	0	NA	14	34310727	34345265	ENSMUSG00000021794	glutamate dehydrogenase 1 [Source:MGI Symbol;Acc:MGI:95753]		7	4.02155	0.0154093	0.24866	0.380952	8	FALSE	8	0	7	0	0.899282	4016	0.228571	Glutamate dehydrogenase 1; mitochondrial; Mitochondrial glutamate dehydrogenase that converts L- glutamate into alpha-ketoglutarate. Plays a key role in glutamine anaplerosis by producing alpha-ketoglutarate; an important intermediate in the tricarboxylic acid cycle. May be involved in learning and memory reactions by increasing the turnover of the excitatory neurotransmitter glutamate.	3.32429	Glud1
Ero1l	-	-	-	-	-	-	X	0	add.P	2.36e-09	39215731	1	RNA : SV63	0	NA	14	45283087	45318771	ENSMUSG00000021831	ERO1-like (S. cerevisiae) [Source:MGI Symbol;Acc:MGI:1354385]
Ephx2	-	X	-	-	-	-	X	0	add.P	7.07e-14	17533896	2	RNA : SV63 | RNA : SV97 | RNA : SV97 | RNA : SV97	0	NA	14	66084374	66124500	ENSMUSG00000022040	epoxide hydrolase 2, cytoplasmic [Source:MGI Symbol;Acc:MGI:99500]		7	4.25	0.0280235	0.235294	0.190476	7	FALSE	7.14286	0	7	0	0.891667	8066	0.253968	Bifunctional epoxide hydrolase 2; Bifunctional enzyme. The C-terminal domain has epoxide hydrolase activity and acts on epoxides (alkene oxides; oxiranes) and arene oxides. Plays a role in xenobiotic metabolism by degrading potentially toxic epoxides. Also determines steady-state levels of physiological mediators. The N-terminal domain has lipid phosphatase activity; with the highest activity tow…	3.13648	Ephx2
Sucla2	X	X	-	-	-	-	-	0	add.P	7.07e-14	9737842	3	DNA : unclassified_C_Deltaproteobacteria | DNA : SV29 | DNA : SV29 | DNA : SV29 | RNA : SV97 | RNA : SV97 | RNA : SV97	2	DNA: SV29 | unclassified_C_Deltaproteobacteria | DNA: SV29 | unclassified_C_Deltaproteobacteria | DNA: SV29 | unclassified_C_Deltaproteobacteria	14	73525319	73596142	ENSMUSG00000022110	succinate-Coenzyme A ligase, ADP-forming, beta subunit [Source:MGI Symbol;Acc:MGI:1306775]		2	4.47414	0.00328047	0.223507	0	9	FALSE	10.5	0	2	0	0.884195	912	0.5	Succinate--CoA ligase [ADP-forming] subunit beta; mitochondrial; ATP-specific succinyl-CoA synthetase functions in the citric acid cycle (TCA); coupling the hydrolysis of succinyl-CoA to the synthesis of ATP and thus represents the only step of substrate-level phosphorylation in the TCA. The beta subunit provides nucleotide specificity of the enzyme and binds the substrate succinate; while the bi…	2.65845	Sucla2
Oxgr1	X	-	-	-	X	-	-	0	add.P	3.1e-16	111733	3	RNA SV22 | RNA SV22 | RNA SV22 | RNA SV36 | RNA SV36 | RNA SV97 | RNA SV97 | RNA SV97 | RNA SV97 | RNA SV97	3	RNA: SV22 | SV97 | SV36	14	120019585	120042435	ENSMUSG00000044819	oxoglutarate (alpha-ketoglutarate) receptor 1 [Source:MGI Symbol;Acc:MGI:2685145]		10	3.79741	0	0.263337	1	8	FALSE	16.6	0	10	0	0.906753	0	0.319231	Oxoglutarate (alpha-ketoglutarate) receptor 1; Receptor for alpha-ketoglutarate. Seems to act exclusively through a G(q)-mediated pathway.	1.38656	Oxgr1
Mtdh	X	-	-	-	-	-	-	0	add.P	3.41e-51	1318735	8	DNA : G_Anaerostipes | DNA : G_Anaerostipes | DNA : G_Anaerostipes | DNA : G_Roseburia | DNA : G_Roseburia | DNA : G_Roseburia | DNA : unclassified_F_Prevotellaceae | DNA : SV243 | DNA : SV243 | DNA : SV243 | DNA : SV79 | DNA : SV79 | DNA : SV79 | RNA : G_Anaerostipes | RNA : G_Anaerostipes | RNA : G_Anaerostipes | RNA : G_Roseburia | RNA : G_Roseburia | RNA : G_Roseburia | RNA : unclassified_F_P…	8	DNA: G_Roseburia | SV79 | G_Anaerostipes | SV243 | unclassified_F_Prevotellaceae | RNA: G_Roseburia | G_Anaerostipes | SV139 | SV79 | SV246 | unclassified_F_Prevotellaceae | SV234	15	34082694	34145624	ENSMUSG00000022255	metadherin [Source:MGI Symbol;Acc:MGI:1914404]		2	3.89655	0.0033932	0.256637	0	7	FALSE	8	0	2	0	0.903448	730	0.5	Lysine-rich CEACAM1 co-isolated protein; Downregulates SLC1A2/EAAT2 promoter activity when expressed ectopically. Activates the nuclear factor kappa-B (NF- kappa-B) transcription factor. Promotes anchorage-independent growth of immortalized melanocytes and astrocytes which is a key component in tumor cell expansion. Promotes lung metastasis and also has an effect on bone and brain metastasis; pos…	2.6466	Mtdh
Laptm4b	-	-	X	-	-	-	-	1	add.P	3.41e-51	1318735	8	DNA : G_Anaerostipes | DNA : G_Anaerostipes | DNA : G_Anaerostipes | DNA : G_Roseburia | DNA : G_Roseburia | DNA : G_Roseburia | DNA : unclassified_F_Prevotellaceae | DNA : SV243 | DNA : SV243 | DNA : SV243 | DNA : SV79 | DNA : SV79 | DNA : SV79 | RNA : G_Anaerostipes | RNA : G_Anaerostipes | RNA : G_Anaerostipes | RNA : G_Roseburia | RNA : G_Roseburia | RNA : G_Roseburia | RNA : unclassified_F_P…	0	NA	15	34238028	34284302	ENSMUSG00000022257	lysosomal-associated protein transmembrane 4B [Source:MGI Symbol;Acc:MGI:1890494]		1	6.21552	0	0.160888	0	11	FALSE	4	0	1	0	0.826149	0	0	Lysosomal-associated protein transmembrane 4B; Required for optimal lysosomal function. Blocks EGF- stimulated EGFR intraluminal sorting and degradation. Conversely by binding with the phosphatidylinositol 4;5-bisphosphate; regulates its PIP5K1C interaction; inhibits HGS ubiquitination and relieves LAPTM4B inhibition of EGFR degradation. Recruits SLC3A2 and SLC7A5 (the Leu transporter) to the lys…	2.69772	Laptm4b
Matn2	-	-	X	-	-	-	-	1	add.P	3.41e-51	1318735	8	DNA : G_Anaerostipes | DNA : G_Anaerostipes | DNA : G_Anaerostipes | DNA : G_Roseburia | DNA : G_Roseburia | DNA : G_Roseburia | DNA : unclassified_F_Prevotellaceae | DNA : SV243 | DNA : SV243 | DNA : SV243 | DNA : SV79 | DNA : SV79 | DNA : SV79 | RNA : G_Anaerostipes | RNA : G_Anaerostipes | RNA : G_Anaerostipes | RNA : G_Roseburia | RNA : G_Roseburia | RNA : G_Roseburia | RNA : unclassified_F_P…	0	NA	15	34306677	34436273	ENSMUSG00000022324	matrilin 2 [Source:MGI Symbol;Acc:MGI:109613]		0	0	0	0	0	0	TRUE	0	0	0	0	Infinity	0	0	Matrilin 2; Involved in matrix assembly.	1.52442	Matn2
Rpl30	-	-	X	-	-	-	-	1	add.P	3.41e-51	1318735	8	DNA : G_Anaerostipes | DNA : G_Anaerostipes | DNA : G_Anaerostipes | DNA : G_Roseburia | DNA : G_Roseburia | DNA : G_Roseburia | DNA : unclassified_F_Prevotellaceae | DNA : SV243 | DNA : SV243 | DNA : SV243 | DNA : SV79 | DNA : SV79 | DNA : SV79 | RNA : G_Anaerostipes | RNA : G_Anaerostipes | RNA : G_Anaerostipes | RNA : G_Roseburia | RNA : G_Roseburia | RNA : G_Roseburia | RNA : unclassified_F_P…	0	NA	15	34440505	34443640	ENSMUSG00000058600	ribosomal protein L30 [Source:MGI Symbol;Acc:MGI:98037]		12	4.25	0.0374587	0.235294	0.363636	9	FALSE	6.66667	0	12	0	0.891667	10052	0.238095	Ribosomal protein L30; Belongs to the eukaryotic ribosomal protein eL30 family.	3.22289	Rpl30
Erich5	-	-	X	-	-	-	-	1	add.P	3.41e-51	1318735	8	DNA : G_Anaerostipes | DNA : G_Anaerostipes | DNA : G_Anaerostipes | DNA : G_Roseburia | DNA : G_Roseburia | DNA : G_Roseburia | DNA : unclassified_F_Prevotellaceae | DNA : SV243 | DNA : SV243 | DNA : SV243 | DNA : SV79 | DNA : SV79 | DNA : SV79 | RNA : G_Anaerostipes | RNA : G_Anaerostipes | RNA : G_Anaerostipes | RNA : G_Roseburia | RNA : G_Roseburia | RNA : G_Roseburia | RNA : unclassified_F_P…	0	NA	15	34453305	34473892	ENSMUSG00000044726	glutamate rich 5 [Source:MGI Symbol;Acc:MGI:2447772]		0	0	0	0	0	0	TRUE	0	0	0	0	Infinity	0	0	Glutamate-rich protein 5; Glutamate rich 5		Erich5
Pop1	-	-	X	-	-	-	-	1	add.P	3.41e-51	1318735	8	DNA : G_Anaerostipes | DNA : G_Anaerostipes | DNA : G_Anaerostipes | DNA : G_Roseburia | DNA : G_Roseburia | DNA : G_Roseburia | DNA : unclassified_F_Prevotellaceae | DNA : SV243 | DNA : SV243 | DNA : SV243 | DNA : SV79 | DNA : SV79 | DNA : SV79 | RNA : G_Anaerostipes | RNA : G_Anaerostipes | RNA : G_Anaerostipes | RNA : G_Roseburia | RNA : G_Roseburia | RNA : G_Roseburia | RNA : unclassified_F_P…	0	NA	15	34495304	34530648	ENSMUSG00000022325	processing of precursor 1, ribonuclease P/MRP family, (S. cerevisiae) [Source:MGI Symbol;Acc:MGI:1914974]		0	0	0	0	0	0	TRUE	0	0	0	0	Infinity	0	0	Processing of precursor 1; ribonuclease P/MRP family; (S. cerevisiae)	0.377831	Pop1
Kcns2	-	-	X	-	-	-	-	1	add.P	3.41e-51	1318735	8	DNA : G_Anaerostipes | DNA : G_Anaerostipes | DNA : G_Anaerostipes | DNA : G_Roseburia | DNA : G_Roseburia | DNA : G_Roseburia | DNA : unclassified_F_Prevotellaceae | DNA : SV243 | DNA : SV243 | DNA : SV243 | DNA : SV79 | DNA : SV79 | DNA : SV79 | RNA : G_Anaerostipes | RNA : G_Anaerostipes | RNA : G_Anaerostipes | RNA : G_Roseburia | RNA : G_Roseburia | RNA : G_Roseburia | RNA : unclassified_F_P…	0	NA	15	34837355	34843407	ENSMUSG00000050963	K+ voltage-gated channel, subfamily S, 2 [Source:MGI Symbol;Acc:MGI:1197011]		4	5.21983	0.00862069	0.191577	0.5	10	FALSE	9	0	4	0	0.859339	3210	0.625	Potassium voltage-gated channel subfamily S member 2; Potassium channel subunit that does not form functional channels by itself. Can form functional heterotetrameric channels with KCNB1 and KCNB2; modulates the delayed rectifier voltage- gated potassium channel activation and deactivation rates of KCNB1 and KCNB2.		Kcns2
Stk3	-	-	X	-	-	-	-	2	add.P	3.41e-51	1318735	8	DNA : G_Anaerostipes | DNA : G_Anaerostipes | DNA : G_Anaerostipes | DNA : G_Roseburia | DNA : G_Roseburia | DNA : G_Roseburia | DNA : unclassified_F_Prevotellaceae | DNA : SV243 | DNA : SV243 | DNA : SV243 | DNA : SV79 | DNA : SV79 | DNA : SV79 | RNA : G_Anaerostipes | RNA : G_Anaerostipes | RNA : G_Anaerostipes | RNA : G_Roseburia | RNA : G_Roseburia | RNA : G_Roseburia | RNA : unclassified_F_P…	0	NA	15	34875496	35178921	ENSMUSG00000022329	serine/threonine kinase 3 [Source:MGI Symbol;Acc:MGI:1928487]		3	4.24138	0.0212216	0.235772	0	8	FALSE	6.33333	0	3	0	0.891954	3648	0.333333	Mammalian STE20-like protein kinase 2; Stress-activated; pro-apoptotic kinase which; following caspase-cleavage; enters the nucleus and induces chromatin condensation followed by internucleosomal DNA fragmentation. Key component of the Hippo signaling pathway which plays a pivotal role in organ size control and tumor suppression by restricting proliferation and promoting apoptosis. The core of th…	1.71422	Stk3
Dgat1	-	X	X	-	-	-	-	1	add.P	6.14e-11	7927327	3	RNA : SV155 | RNA : SV155 | RNA : SV155 | RNA : SV170 | RNA : SV170 | RNA : SV180 | RNA : SV180	0	NA	15	76502015	76511953	ENSMUSG00000022555	diacylglycerol O-acyltransferase 1 [Source:MGI Symbol;Acc:MGI:1333825]		3	4.50862	0.0195752	0.221797	0	8	FALSE	6	0	3	0	0.883046	4942	0.384615	Acyl-CoA retinol O-fatty-acyltransferase; Catalyzes the terminal and only committed step in triacylglycerol synthesis by using diacylglycerol and fatty acyl CoA as substrates. In contrast to DGAT2 it is not essential for survival. May be involved in VLDL (very low density lipoprotein) assembly. In liver; plays a role in esterifying exogenous fatty acids to glycerol. Functions as the major acyl-Co…	3.80438	Dgat1
Tomm22	-	X	-	-	-	-	X	0	add.P	1.7e-18	4279780	4	RNA : SV155 | RNA : SV170 | RNA : SV180 | RNA : SV36 | RNA : SV36 | RNA : SV36	0	NA	15	79670861	79673400	ENSMUSG00000022427	translocase of outer mitochondrial membrane 22 [Source:MGI Symbol;Acc:MGI:2450248]
Mchr1	X	-	-	X	-	-	-	0	add.P	1.7e-18	1098871	5	RNA : SV155 | RNA : SV170 | RNA : SV180 | RNA : SV36 | RNA : SV36 | RNA : SV36 | RNA : SV97	2	RNA: SV36 | SV97	15	81235499	81238964	ENSMUSG00000050164	melanin-concentrating hormone receptor 1 [Source:MGI Symbol;Acc:MGI:2180756]		18	3.71552	0.00904559	0.269142	0.594771	8	FALSE	14.1667	0	18	0	0.909483	3282	0.252976	Melanin-concentrating hormone receptor 1; Receptor for melanin-concentrating hormone; coupled to both G proteins that inhibit adenylyl cyclase and G proteins that activate phosphoinositide hydrolysis.	1.56628	Mchr1
Cyp2d26	-	X	-	-	-	-	X	0	add.P	6.14e-11	20709499	3	RNA : SV155 | RNA : SV170 | RNA : SV180	0	NA	15	82790101	82794294	ENSMUSG00000022445	cytochrome P450, family 2, subfamily d, polypeptide 26 [Source:MGI Symbol;Acc:MGI:1923529]		6	4.50431	0.0202217	0.22201	0.266667	9	FALSE	8.66667	0	6	0	0.88319	8032	0.369565	Cytochrome P450; family 2; subfamily d; polypeptide 26; Cytochromes P450 are a group of heme-thiolate monooxygenases. In liver microsomes; this enzyme is involved in an NADPH-dependent electron transport pathway. It oxidizes a variety of structurally unrelated compounds; including steroids; fatty acids; and xenobiotics.	2.95397	Cyp2d26
Adamts20	X	-	X	-	-	-	-	1	add.P	1.87e-113	0	3	DNA : G_Dorea | DNA : G_Dorea | DNA : G_Dorea | RNA : G_Dorea | RNA : G_Dorea | RNA : G_Dorea | RNA : SV184 | RNA : SV184 | RNA : SV184 | RNA : SV293 | RNA : SV293 | RNA : SV293	3	DNA: G_Dorea | RNA: G_Dorea | SV293 | SV184	15	94270163	94465418	ENSMUSG00000022449	a disintegrin-like and metallopeptidase (reprolysin type) with thrombospondin type 1 motif, 20 [Source:MGI Symbol;Acc:MGI:2660628]		0	0	0	0	0	0	TRUE	0	0	0	0	Infinity	0	0	A disintegrin-like and metallopeptidase (reprolysin type) with thrombospondin type 1 motif; 20; May play a role in tissue-remodeling process occurring in both normal and pathological conditions. May have a protease- independent function in the transport from the endoplasmic reticulum to the Golgi apparatus of secretory cargos; mediated by the GON domain.	0.956401	Adamts20
Srl	X	-	X	-	-	-	-	1	add.P	1.92e-09	60729	1	DNA : SV113	1	DNA: SV113	16	4480216	4541816	ENSMUSG00000022519	sarcalumenin [Source:MGI Symbol;Acc:MGI:2146620]		2	1	0	1	1	1	FALSE	2	0	2	0	1	0	1	Sarcalumenin; May be involved in the regulation of calcium transport.	0.183037	Srl
Dnajb11	-	X	-	-	-	X	-	0	add.P	4.72e-11	20527619	1	RNA : SV234 | RNA : SV234 | RNA : SV234	0	NA	16	22857845	22879634	ENSMUSG00000004460	DnaJ heat shock protein family (Hsp40) member B11 [Source:MGI Symbol;Acc:MGI:1915088]
Htr1f	X	-	-	-	X	-	-	0	add.P	5.57e-19	27533448	1	RNA : SV135	3	DNA: G_Anaerostipes | SV79 | RNA: SV79 | G_Anaerostipes | SV139	16	64924729	65105854	ENSMUSG00000050783	5-hydroxytryptamine (serotonin) receptor 1F [Source:MGI Symbol;Acc:MGI:99842]		11	3.67241	0.0117088	0.2723	0.818182	8	FALSE	15.2727	0	11	0	0.91092	3120	0.286449	5-hydroxytryptamine (serotonin) receptor 1F; G-protein coupled receptor for 5-hydroxytryptamine (serotonin). Also functions as a receptor for various alkaloids and psychoactive substances. Ligand binding causes a conformation change that triggers signaling via guanine nucleotide-binding proteins (G proteins) and modulates the activity of down-stream effectors; such as adenylate cyclase. Signaling…	0.76094	Htr1f
Cbr1	X	-	X	-	-	-	-	1	add.P	2.66e-09	37204	1	DNA : SV3	1	DNA: SV3 | DNA: SV3 | DNA: SV3	16	93605853	93610505	ENSMUSG00000051483	carbonyl reductase 1 [Source:MGI Symbol;Acc:MGI:88284]		1	1	0	1	0	1	FALSE	1	0	1	0	1	0	0	15-hydroxyprostaglandin dehydrogenase [NADP(+)]; NADPH-dependent reductase with broad substrate specificity. Catalyzes the reduction of a wide variety of carbonyl compounds including quinones; prostaglandins; menadione; plus various xenobiotics. Catalyzes the reduction of the antitumor anthracyclines doxorubicin and daunorubicin to the cardiotoxic compounds doxorubicinol and daunorubicinol. Can c…	3.06416	Cbr1
Cbr3	X	X	-	-	-	-	-	0	add.P	3.72e-11	37204	1	DNA SV3	1	DNA: SV3 | DNA: SV3	16	93683215	93690990	ENSMUSG00000022947	carbonyl reductase 3 [Source:MGI Symbol;Acc:MGI:1309992]		1	1	0	1	0	1	FALSE	1	0	1	0	1	0	0	NADPH-dependent carbonyl reductase 3; Has low NADPH-dependent oxidoreductase activity towards 4-benzoylpyridine and menadione (in vitro).	2.36736	Cbr3
C4b	X	-	-	-	X	-	-	0	dom.P	1.03e-15	10123822	2	DNA : SV145 | DNA : SV145 | DNA : SV145 | RNA : SV145 | RNA : SV145 | RNA : SV145 | RNA : SV50 | RNA : SV50 | RNA : SV50	2	DNA: SV145 | DNA: SV145 | RNA: SV145 | DNA: SV145 | RNA: SV145 | DNA: SV5	17	34728380	34743882	ENSMUSG00000073418	complement component 4B (Chido blood group) [Source:MGI Symbol;Acc:MGI:88228]		10	3.85345	0.00987254	0.259508	0.666667	8	FALSE	11.2	0	10	0	0.904885	2420	0.25814	Complement component 4B (Chido blood group); Non-enzymatic component of C3 and C5 convertases and thus essential for the propagation of the classical complement pathway. Covalently binds to immunoglobulins and immune complexes and enhances the solubilization of immune aggregates and the clearance of IC through CR1 on erythrocytes. Catalyzes the transacylation of the thioester carbonyl group to fo…	2.91236	C4b
Cfb	X	-	-	-	X	-	-	0	dom.P	1.03e-15	10123822	2	DNA : SV145 | DNA : SV145 | DNA : SV145 | RNA : SV145 | RNA : SV145 | RNA : SV145 | RNA : SV50 | RNA : SV50 | RNA : SV50	1	DNA: SV145 | RNA: SV145	17	34856374	34862518	ENSMUSG00000090231	complement factor B [Source:MGI Symbol;Acc:MGI:105975]		6	3.98707	0.0100773	0.250811	0.4	8	FALSE	12.1667	0	6	0	0.900431	2358	0.324324	Complement factor B; Factor B which is part of the alternate pathway of the complement system is cleaved by factor D into 2 fragments: Ba and Bb. Bb; a serine protease; then combines with complement factor 3b to generate the C3 or C5 convertase; Belongs to the peptidase S1 family.	3.20815	Cfb
Hspa1b	-	X	-	-	-	X	-	0	dom.P	1.03e-15	10123822	2	DNA : SV145 | DNA : SV145 | DNA : SV145 | RNA : SV145 | RNA : SV145 | RNA : SV50 | RNA : SV50 | RNA : SV50	0	NA	17	34956436	34959238	ENSMUSG00000090877	heat shock protein 1B [Source:MGI Symbol;Acc:MGI:99517]
Hspa1l	-	X	-	-	-	-	X	0	dom.P	1.03e-15	10123822	2	DNA : SV145 | DNA : SV145 | DNA : SV145 | RNA : SV145 | RNA : SV145 | RNA : SV50 | RNA : SV50 | RNA : SV50	0	NA	17	34972703	34979285	ENSMUSG00000007033	heat shock protein 1-like [Source:MGI Symbol;Acc:MGI:96231]
Mep1a	-	X	X	-	-	-	-	2	add.P	1.8e-12	5190732	3	DNA : G_Butyricicoccus | DNA : SV145 | DNA : SV145 | DNA : SV145 | RNA : SV145 | RNA : SV145 | RNA : SV264 | RNA : SV264	0	NA	17	43474324	43502812	ENSMUSG00000023914	meprin 1 alpha [Source:MGI Symbol;Acc:MGI:96963]		3	4.37931	0.0257128	0.228346	0	8	FALSE	7	0	3	0	0.887356	3832	0.333333	Meprin 1 alpha; Belongs to the peptidase M12A family.	3.36885	Mep1a
C3	X	-	X	X	-	-	-	2	add.P	1.8e-12	231	2	DNA : SV145 | DNA : SV145 | DNA : SV145 | RNA : unclassified_C_Deltaproteobacteria | RNA : SV145	1	RNA: unclassified_C_Deltaproteobacteria	17	57203970	57228136	ENSMUSG00000024164	complement component 3 [Source:MGI Symbol;Acc:MGI:88227]		25	3.2931	0.092681	0.303665	0.293333	7	FALSE	11.2	0	25	0	0.923563	20612	0.162319	Complement component 3; C3 plays a central role in the activation of the complement system. Its processing by C3 convertase is the central reaction in both classical and alternative complement pathways. After activation C3b can bind covalently; via its reactive thioester; to cell surface carbohydrates or immune aggregates.	3.06424	C3
Galnt14	X	-	X	-	-	-	-	4	add.P	5.37e-14	0	4	DNA : F_Prevotellaceae | DNA : F_Prevotellaceae | DNA : G_Paraprevotella | DNA : G_Paraprevotella | DNA : SV7 | DNA : SV7 | RNA : F_Prevotellaceae | RNA : G_Paraprevotella | RNA : G_Paraprevotella | RNA : SV158 | RNA : SV158 | RNA : SV158	4	DNA: G_Paraprevotella | F_Prevotellaceae | SV7 | RNA: G_Paraprevotella | SV158 | F_Prevotellaceae	17	73493228	73710453	ENSMUSG00000024064	polypeptide N-acetylgalactosaminyltransferase 14 [Source:MGI Symbol;Acc:MGI:1918935]		0	0	0	0	0	0	TRUE	0	0	0	0	Infinity	0	0	UDP-N-acetyl-alpha-D-galactosamine:polypeptide N-acetylgalactosaminyltransferase 14; Catalyzes the initial reaction in O-linked oligosaccharide biosynthesis; the transfer of an N-acetyl-D- galactosamine residue to a serine or threonine residue on the protein receptor. Displays activity toward mucin-derived peptide substrates such as Muc2; Muc5AC; Muc7; and Muc13 (-58). May be involved in O-glycos…	1.33461	Galnt14
Slc3a1	X	X	X	-	-	-	-	NA	add.P	5.37e-14	1405853	3	DNA : F_Prevotellaceae | DNA : F_Prevotellaceae | DNA : G_Paraprevotella | DNA : G_Paraprevotella | DNA : SV7 | DNA : SV7 | RNA : F_Prevotellaceae | RNA : G_Paraprevotella	2	DNA: SV7 | G_Paraprevotella	17	85028376	85064236	ENSMUSG00000024131	solute carrier family 3, member 1 [Source:MGI Symbol;Acc:MGI:1195264]		3	4.87069	0.0134206	0.20531	0	9	FALSE	5	0	3	0	0.870977	3188	0.333333	Neutral and basic amino acid transport protein rBAT; Involved in the high-affinity sodium-independent transport of cystine and neutral and dibasic amino acids (system B(0;+)-like activity). May function as an activator of SLC7A9 and be involved in the high-affinity reabsorption of cystine in the kidney proximal tubule.	3.14357	Slc3a1
Adcyap1	X	-	-	-	X	-	-	0	add.P	4.27e-11	22037	1	RNA SV97 | RNA SV97	1	RNA: SV97	17	93199017	93206537	ENSMUSG00000024256	adenylate cyclase activating polypeptide 1 [Source:MGI Symbol;Acc:MGI:105094]		8	3.76724	0.0249175	0.265446	0.535714	7	FALSE	9.375	0	8	0	0.907759	4442	0.222561	Pituitary adenylate cyclase-activating polypeptide; Binding to its receptor activates G proteins and stimulates adenylate cyclase in pituitary cells (By similarity). Promotes neuron projection development through the RAPGEF2/Rap1/B- Raf/ERK pathway (By similarity). In chromaffin cells; induces long-lasting increase of intracellular calcium concentrations and neuroendocrine secretion (By similarit…	1.9947	Adcyap1
Mettl4	X	-	-	-	-	-	-	0	add.P	1.26e-12	22037	1	RNA SV97 | RNA SV97	1	RNA: SV97	17	94722590	94750019	ENSMUSG00000055660	methyltransferase like 4 [Source:MGI Symbol;Acc:MGI:1924031]		1	4.76293	0	0.209955	0	8	FALSE	8	0	1	0	0.874569	0	0	Methyltransferase-like protein 4; Probable methyltransferase.	0.245396	Mettl4
Ppp2r2b	X	-	-	-	-	-	-	0	add.P	2.07e-41	959184	6	DNA : C_Bacilli | DNA : C_Bacilli | DNA : C_Bacilli | DNA : F_Staphylococcaceae | DNA : F_Staphylococcaceae | DNA : F_Staphylococcaceae | DNA : G_Staphylococcus | DNA : G_Staphylococcus | DNA : G_Staphylococcus | DNA : O_Bacillales | DNA : O_Bacillales | DNA : O_Bacillales | DNA : SV156 | DNA : SV156 | DNA : SV156 | DNA : SV9 | DNA : SV9 | DNA : SV9	6	DNA: C_Bacilli | SV9 | O_Bacillales | F_Staphylococcaceae | G_Staphylococcus | SV156 | DNA: SV156 | C_Bacilli | G_Staphylococcus | SV9 | O_Bacillales | F_Staphylococcaceae	18	42637432	43083127	ENSMUSG00000024500	protein phosphatase 2, regulatory subunit B, beta [Source:MGI Symbol;Acc:MGI:1920180]		4	4.2069	0.0092009	0.237705	0.166667	7	FALSE	4	0	4	0	0.893103	1526	0.291667	Serine/threonine-protein phosphatase 2A 55 kDa regulatory subunit B beta isoform; The B regulatory subunit might modulate substrate selectivity and catalytic activity; and also might direct the localization of the catalytic enzyme to a particular subcellular compartment. Within the PP2A holoenzyme complex; isoform 2 is required to promote proapoptotic activity. Isoform 2 regulates neuronal surviv…	1.72711	Ppp2r2b
Alpk2	X	-	-	-	-	-	-	0	add.P	3.38e-21	2950683	7	RNA : unclassified_F_Rumi-coccaceae | RNA : unclassified_F_Rumi-coccaceae | RNA : unclassified_F_Rumi-coccaceae | RNA : SV155 | RNA : SV155 | RNA : SV170 | RNA : SV170 | RNA : SV180 | RNA : SV180 | RNA : SV180 | RNA : SV25 | RNA : SV25 | RNA : SV25 | RNA : SV49 | RNA : SV49 | RNA : SV49 | RNA : SV82 | RNA : SV82 | RNA : SV82	7	RNA: SV82 | unclassified_F_Rumi-coccaceae | SV49 | SV25 | SV180 | SV170 | SV155	18	65265529	65394066	ENSMUSG00000032845	alpha-kinase 2 [Source:MGI Symbol;Acc:MGI:2449492]		1	1.5	0	0.666667	0	2	FALSE	2	0	1	0	0.75	0	0	Ankyrin repeat domain 45		Ankrd45
Rpl17	-	X	-	-	-	-	-	0	add.P	9.66e-09	19066636	1	DNA : SV17	0	NA	18	74998558	75003381	ENSMUSG00000062328	ribosomal protein L17 [Source:MGI Symbol;Acc:MGI:2448270]		6	4.74138	0.000266936	0.210909	0.933333	9	FALSE	9.66667	0	6	0	0.875287	108	0.537037	60S ribosomal protein L17; Component of the large ribosomal subunit.	2.91685	Rpl17
Galr1	X	-	-	-	X	-	-	0	add.P	2.59e-13	19066636	1	DNA : SV17	1	DNA: SV17	18	82392380	82406777	ENSMUSG00000024553	galanin receptor 1 [Source:MGI Symbol;Acc:MGI:1096364]		10	3.79741	0	0.263337	1	8	FALSE	16.6	0	10	0	0.906753	0	0.319231	Galanin receptor type 1; Receptor for the hormone galanin. The activity of this receptor is mediated by G proteins that inhibit adenylate cyclase activity; Belongs to the G-protein coupled receptor 1 family.	1.58946	Galr1
Cyp2c55	-	X	-	-	-	X	-	0	add.P	6.68e-10	8701865	3	DNA : SV5 | RNA : SV126 | RNA : SV126 | RNA : SV238 | RNA : SV238 | RNA : SV238	0	NA	19	39007019	39042693	ENSMUSG00000025002	cytochrome P450, family 2, subfamily c, polypeptide 55 [Source:MGI Symbol;Acc:MGI:1919332]		9	4.28448	0.00786397	0.2334	0.583333	8	FALSE	7.22222	0	9	0	0.890517	4086	0.401235	Cytochrome P450; family 2; subfamily c; polypeptide 55; Metabolizes arachidonic acid mainly to 19- hydroxyeicosatetraenoic acid (HETE); Belongs to the cytochrome P450 family.	3.44229	Cyp2c55
Cyp2c65	-	X	-	-	-	X	-	0	add.P	6.68e-10	8701865	3	DNA : SV5 | RNA : SV126 | RNA : SV126 | RNA : SV238 | RNA : SV238 | RNA : SV238	0	NA	19	39061015	39093944	ENSMUSG00000067231	cytochrome P450, family 2, subfamily c, polypeptide 65 [Source:MGI Symbol;Acc:MGI:1919553]		9	4.28448	0.00786397	0.2334	0.583333	8	FALSE	7.22222	0	9	0	0.890517	4086	0.401235	Cytochrome P450; family 2; subfamily c; polypeptide 65	3.13473	Cyp2c65
																						11	3.71983	0.0351964	0.26883	0.2	8	FALSE	7.09091	0	11	0	0.909339	8588	0.175	2-phospho-D-glycerate hydro-lyase; Multifunctional enzyme that; as well as its role in glycolysis; plays a part in various processes such as growth control; hypoxia tolerance and allergic responses (By similarity). May also function in the intravascular and pericellular fibrinolytic system due to its ability to serve as a receptor and activator of plasminogen on the cell surface of several cell-t…	3.53222	Eno1
																						0	0	0	0	0	0	TRUE	0	0	0	0	Infinity	0	0	RIKEN cDNA 4930470P17 gene		mCG_9035
																						0	0	0	0	0	0	TRUE	0	0	0	0	Infinity	0	0	RIKEN cDNA 1700025C18 gene		1700025C18Rik

## Sheet: Legend
Gene	candidate gene
Closest to SNP	Is the gene the closest gene to the peak SNP
Diff. expressed in GF	Is the gene found to be differentially expressed in GF vs. conventional mice
In other studies	IS the gene found in other mouse QTL studies
Hub genes network snps	Is the gene a hub gene in the STRING network of all the genes situated closest to the peak SNP
First neighbors hubs snps network	Is the gene a first neighbor of a hub gene in the SNP gene network
Hub genes network diff. expression	Is the gene a hub gene in the network containing the genes that are also found to be differentially expressed in GF vs conventional mice
First neighbours hub genes network diff. expression	Is the gene a neighbor of the hub gene in the differentially expressed network
Number of overlaps with other studies	How many times is it found in other studies
P type	Which model had the lowest P value (total, additive or dominance)
Min P	lowest P value
Min interval (Mb)	Interval of significant region in megabases (Mb)
Number of taxa intervals	Number of taxa with this gene in the significant region
Taxa interval	Taxa with this gene in the significat region, taxa in bold (heritability >0.5), taxa in italics (co-speciation rate > 0.5)
Number of taxa marker	Number of taxa with the SNP significant
Taxa marker	Taxa with the SNP significant, taxa in bold (heritability >0.5), taxa in italics (co-speciation rate > 0.5)
Chr	Chromosome where gene is situated
Start_position	Start position gene
End_position	End position gene
Ensembl_gene_id	Ensemble gene id
Description	Ensemble gene description
